# Supplementary material for: Engaging high-risk groups in early lung cancer diagnosis: a qualitative study of symptom presentation and intervention preferences among the UK’s most deprived communities
Source: PubMed Central journal article supplement (PMC6538016; doi:10.1136/bmjopen-2018-025902), 2019-05-22
Supplement: bmjopen-2018-025902.draft_revisions.pdf [file bmjopen-2018-025902.draft_revisions.pdf]

# BMJ Open

BMJ Open is committed to open peer review. As part of this commitment we make the peer review history of every article we publish publicly available.

When an article is published we post the peer reviewers' comments and the authors' responses online. We also post the versions of the paper that were used during peer review. These are the versions that the peer review comments apply to.

The versions of the paper that follow are the versions that were submitted during the peer review process. They are not the versions of record or the final published versions. They should not be cited or distributed as the published version of this manuscript.

BMJ Open is an open access journal and the full, final, typeset and author-corrected version of record of the manuscript is available on our site with no access controls, subscription charges or pay-per-view fees (<http://bmjopen.bmj.com>).

If you have any questions on BMJ Open's open peer review process please email [info.bmjopen@bmj.com](mailto:info.bmjopen@bmj.com)

# BMJ Open

## Engaging high-risk groups in early lung cancer detection: a qualitative study of symptom presentation and intervention preferences amongst the UK's most deprived communities

|                               |                                                                                                                                                                                                                                                                                                                                                                                                                                                                                                                                                                                                                                                                                        |
|-------------------------------|----------------------------------------------------------------------------------------------------------------------------------------------------------------------------------------------------------------------------------------------------------------------------------------------------------------------------------------------------------------------------------------------------------------------------------------------------------------------------------------------------------------------------------------------------------------------------------------------------------------------------------------------------------------------------------------|
| Journal:                      | <i>BMJ Open</i>                                                                                                                                                                                                                                                                                                                                                                                                                                                                                                                                                                                                                                                                        |
| Manuscript ID                 | bmjopen-2018-025902                                                                                                                                                                                                                                                                                                                                                                                                                                                                                                                                                                                                                                                                    |
| Article Type:                 | Research                                                                                                                                                                                                                                                                                                                                                                                                                                                                                                                                                                                                                                                                               |
| Date Submitted by the Author: | 09-Aug-2018                                                                                                                                                                                                                                                                                                                                                                                                                                                                                                                                                                                                                                                                            |
| Complete List of Authors:     | <p>McCutchan, GM; Cardiff University, Division of Population Medicine<br/> Hiscock, Julia; Bangor University, North Wales Centre for Primary Care Research<br/> Hood, Kerenza<br/> Murchie, Peter; University of Aberdeen, Division of Applied Health Science<br/> Neal, RD; University of Leeds<br/> Newton, Gareth; Cardiff University, Division of Population Medicine, Patient and Public Involvement<br/> Thomas, Sara; Public Health Wales, Cwm Taf Public Health Team<br/> Thomas, Ann Maria; Cardiff University, Division of Population Medicine, Patient and Public Involvement<br/> Brain, Kate; Cardiff University, Division of Population Medicine, School of Medicine</p> |
| Keywords:                     | PRIMARY CARE, PUBLIC HEALTH, QUALITATIVE RESEARCH, RESPIRATORY MEDICINE (see Thoracic Medicine), lung cancer, socioeconomic status                                                                                                                                                                                                                                                                                                                                                                                                                                                                                                                                                     |
|                               |                                                                                                                                                                                                                                                                                                                                                                                                                                                                                                                                                                                                                                                                                        |

SCHOLARONE™  
Manuscripts

1  
2  
3 1 **Title page**

4 2  
5  
6 3 **Title:** Engaging high-risk groups in early lung cancer detection: a qualitative study of symptom  
7 4 presentation and intervention preferences amongst the UK's most deprived communities  
8 5

9  
10 6 **Authors:** Dr Grace McCutchan<sup>1§</sup>, Dr Julia Hiscock<sup>2</sup>, Prof Kerry Hood<sup>3</sup>, Dr Peter Murchie<sup>4</sup>, Prof Richard  
11 7 Neal<sup>5</sup>, Mr Gareth Newton<sup>1</sup>, Mrs Sara Thomas<sup>6</sup>, Mrs Ann-Maria Thomas<sup>1</sup>, Dr Kate Brain<sup>1</sup>  
12 8

13 9  
14 10  
15 11 **Affiliations:**

16 12 <sup>1</sup>Division of Population Medicine, School of Medicine, Cardiff University, Cardiff, UK

17 13 <sup>2</sup>North Wales Centre for Primary Care Research, Bangor University, Wrexham, UK

18 14 <sup>3</sup>Centre for Trials Research, School of Medicine, Cardiff University, Cardiff, UK

19 15 <sup>4</sup>Division of Applied Health Sciences, Section of Academic Primary Care, University of Aberdeen,  
20 16 Aberdeen, UK

21 17 <sup>5</sup>Leeds Institute of Health Sciences, Faculty of Medicine and Health, University of Leeds, Leeds, UK

22 18 <sup>6</sup>Cwm Taf Public Health Team, Public Health Wales, Kier Hardy University Health Park, Merthyr  
23 19 Tydfil, UK.  
24 20

25 21 <sup>§</sup>**Corresponding author:** Grace McCutchan. Postal address: Division of Population Medicine, Cardiff  
26 22 University, 1st Floor, Neuadd Meirionnydd, Heath Park, Cardiff, CF14 4YS. Email:  
27 23 mccutchanGM@cardiff.ac.uk. Telephone: +44 (0)2920 687639.  
28 24

29 25  
30 26  
31 27  
32 28  
33 29  
34 30  
35 31  
36 32  
37 33  
38 34  
39 35  
40 36  
41 37  
42 38  
43 39  
44 40  
45 41  
46 42  
47 43  
48 44  
49 45  
50 46  
51 47  
52 48  
53 49  
54 50  
55 51  
56 52  
57 53  
58 54  
59 55  
60 56

23 **Word count: 4738**

## 1 **Abstract**

### 3 **Objectives**

4 People at high-risk for lung cancer - current/former smokers, aged 40+ years, with serious lung  
5 comorbidity (i.e. Chronic Obstructive Pulmonary Disease) and living in highly deprived areas - are  
6 more likely to prolong symptom presentation, leading to advanced stage diagnosis. This qualitative  
7 study aimed to understand the influences on early presentation with lung cancer symptoms in high-  
8 risk individuals and intervention preferences.

### 10 **Methods**

11 Semi-structured qualitative interviews with 37 high-risk individuals, identified through seven GP  
12 practices socioeconomically deprived areas of England, Scotland and Wales (most deprived 20%). A  
13 symptom attribution task was used to explore lung symptom perception and help seeking,  
14 underpinned by Leventhal's Common Sense model. Four focus groups with high-risk individuals and  
15 local stakeholders (healthcare professionals and community partners) to explore preferences for an  
16 intervention to promote early lung cancer symptom presentation. Data were synthesised using  
17 Framework analysis.

### 19 **Results**

20 Individual and area level indicators of deprivation confirm that our sample were highly deprived.  
21 Fixation on managing 'treatable' short-term conditions (chest infections), led to denial and  
22 avoidance of 'inevitable and incurable' longer-term conditions (lung cancer). Feeling judged and  
23 unworthy of medical help because of their perceived social standing or lifestyle deterred medical  
24 help seeking, particularly when difficult life circumstances and traumatic events lead to  
25 current/former tobacco and alcohol addiction. Focus group participants suggested multi-faceted  
26 interventions in community venues, with information about lung cancer symptoms and the benefits  
27 of early diagnosis, led by a trained and non-judgemental facilitator.

### 29 **Conclusions**

30 This study was novel in engaging a high risk, highly deprived sample to provide in-depth  
31 understanding of the broader contextual influences on self-management of lung cancer symptoms.  
32 Perceived lack of health service entitlement and complex lives facilitated avoidance of recognising  
33 and presenting with lung cancer symptoms. Community-based interventions are required to  
34 empower this population to seek medical help.

1  
2  
3 1 **Key words:** Lung cancer, deprived, qualitative, early diagnosis, medical help seeking, barriers.  
4  
5 2

6 3 **Strengths and limitations of the study**

- 7 4
- 8 • This was the first study to use in-depth qualitative methods to explore how to engage  
9 individuals who are highest risk for lung cancer in early lung cancer detection.  
10
  - 11 • A major strength of this study was the proactive and rigorous sampling procedures used, to  
12 ensure that all interview participants recruited were at highest risk for lung cancer.  
13
  - 14 • Assessment of individual and area level indicators of deprivation confirm that interview  
15 participants were highly deprived; all participants resided in the most deprived 20% areas of  
16 three nations of the UK, and most participants were unemployed/seeking benefits, and/or  
17 rented social housing.  
18
  - 19 • To overcome the methodological limitations associated with studying anticipated or  
20 retrospectively recalled cancer symptom presentation, we recruited participants with no  
21 previous diagnosis of lung cancer and did not mention lung cancer in the interview study  
22 materials or during completion of the symptom attribution task.  
23
  - 24 • Opportunistic recruitment of focus group participations was a potential limitation of the  
25 study as participants may be more favourably disposed to an intervention.  
26  
27  
28  
29  
30  
31  
32  
33  
34  
35  
36  
37  
38  
39  
40  
41  
42  
43  
44  
45  
46  
47  
48  
49  
50  
51  
52  
53  
54  
55  
56  
57  
58  
59  
60

## 1 INTRODUCTION

2 Lung cancer is the leading cause of cancer mortality worldwide[1]. Outcomes are among the poorest  
3 for all cancers, with only 10% of lung cancer patients surviving five or more years in the UK[2].

4 Diagnosis of lung cancer at an early stage can enable curative surgical resection, meaning over 80%  
5 of patients will survive one year or more when diagnosed at Stage I[3]. Delayed medical help seeking  
6 for symptoms and the high proportion of lung cancer diagnoses through emergency departments  
7 may partly explain why lung cancer is commonly diagnosed at an advanced, incurable stage[4]. Due  
8 to low specificity of lung cancer symptoms and similarity to other acute and comorbid respiratory  
9 conditions, patients face difficulty in knowing when to seek medical help[5,6].

10  
11 Multiple symptoms and risk factors for lung cancer including older age, smoking, the presence of a  
12 lung comorbidity and socioeconomic deprivation increase the likelihood that a symptomatic  
13 individual has lung cancer[7-9]. Lung cancer is more common and mortality higher in areas of high  
14 socioeconomic deprivation; it has been estimated that each year, socioeconomic inequalities  
15 account for 11,700 excess cases of lung cancer and 9,900 potentially avoidable lung cancer deaths in  
16 England[10]. High prevalence of smoking, lung comorbid conditions and industry-type work such as  
17 mining, all of which are well documented risk factors for lung cancer, contribute to high lung cancer  
18 incidence and mortality in deprived communities[11, 12].

19  
20 The presence of lung comorbidity such as chronic obstructive pulmonary disease (COPD) and history  
21 of smoking have been associated with a lower likelihood of presenting with lung cancer symptoms  
22 early[13,14]. In the lead up to lung cancer diagnosis, vague symptoms may go unnoticed, or be  
23 misattributed to smoking, aging or other comorbid conditions such as heart disease or emphysema,  
24 thereby prolonging help seeking[5,13,15-26]. In addition, stigma attached to lung cancer[23,27-30]  
25 and fear of lung cancer diagnosis can deter medical help seeking for symptoms, particularly among  
26 smokers[23-25,29,31-33], leading to advanced stage disease at diagnosis[19]. To date, research has  
27 mainly been conducted with lung cancer patients from a range of socioeconomic groups,  
28 retrospectively exploring the barriers to symptom presentation.

29  
30 The current study used a combination of interviews and focus groups to gain in-depth understanding  
31 of the influences on lung cancer symptom presentation behaviour and intervention preferences in  
32 high risk, highly deprived groups. We targeted socioeconomically deprived areas across three  
33 nations of the UK to approach potential participants, and used rigorous sampling procedures to  
34 ensure that our sample were at the highest risk for lung cancer. The focus groups, conducted in

1 highly deprived areas, explored intervention preferences with stakeholders who live or work in  
2 deprived communities. To our knowledge, this was the first study to explore the influences on early  
3 lung cancer detection and intervention preferences in high risk groups living in the most deprived  
4 quintiles in the UK.

## 6 **METHODS**

7 The Consolidated Criteria for Reporting Qualitative Research (COREQ)[34] criteria were used to  
8 guide reporting (Supplementary File 1).

### 10 **Participant recruitment and sampling**

12 **Interviews.** Interview participants were recruited through seven general medical practices (GP) in  
13 South Wales (Cwm Taf, n=3), England (Liverpool, n=1) and Scotland (Aberdeen, n=3). GP practices  
14 with the highest proportion of their patients that reside in the lowest quintile of deprivation were  
15 contacted. Practice managers were asked to screen GP practice databases purposively for eligible  
16 study participants: men and women over the age of 40, who were current or former smokers, with a  
17 lung condition (COPD including chronic bronchitis and emphysema, interstitial lung disease or  
18 occupational lung disease). Participants were sampled purposively according to smoking status due  
19 to an initially high response rate from former smokers. GP practices in Cwm Taf were asked to  
20 recruit current and former smokers, with no parameter on number of years since quit attempt. One  
21 GP practice in Aberdeen was asked to recruit current smokers and recent quitters (within ten years).  
22 Two GP practices in Aberdeen and one GP practice in Liverpool recruited current smokers only.

24 To ensure that participants from highly deprived areas were invited to take part in the study,  
25 individual postcodes were screened by the research team. Eligible patients from the initial database  
26 screen were assigned a pseudo-anonymised participant identifier (PID). PID and postcode were  
27 checked against Index of Multiple Deprivation score, and those that resided in the most deprived  
28 quintile were eligible for the study. The final list of potentially eligible participants was checked by  
29 the GP for ability to provide informed consent, uncontrolled drug or alcohol misuse or violence (i.e.  
30 considered by the GP to be a risk to the interviewer or themselves) and general health status (i.e.  
31 very seriously ill). Participants were excluded if they were diagnosed with lung cancer, were  
32 terminally ill or did not have capacity to consent.

1 **Focus groups.** Participants for the focus groups with members of the public were recruited  
2 opportunistically through primary care or local community groups. Participant recruitment through  
3 primary care employed the same methods as those used to invite the interview participants.  
4 Pseudonymised participant identifiers were checked to ensure that those who took part in the focus  
5 groups had not already participated in the interviews. Additional participants were recruited  
6 opportunistically through local community respiratory support groups and non-health related groups  
7 in the local community centre. Local community group organisers in areas of high deprivation were  
8 contacted and asked for help to recruit members of the public in our target group. Local health  
9 service planning groups and health board staff facilitated recruitment for the healthcare professional  
10 and community partner (HPCP) focus groups.

## 11 **Study procedures**

12  
13  
14 Written consent and permission to audio-record were obtained prior to the interviews and focus  
15 groups.

16  
17 **Interviews.** Eligible participants were invited by letter with more detailed study information  
18 attached, with a reminder at two weeks to non-respondents. Those consenting were contacted by  
19 the interviewer (GM or JH) to arrange a suitable time and date for the interview, to outline the study  
20 and answer any questions.

21  
22 Interviews were conducted using a semi-structured topic guide based on the Common Sense Model  
23 to guide discussion around illness perceptions and coping strategies[35]. The interview aimed to  
24 explore experiences of their lung condition, symptom attribution, symptom experience and help  
25 seeking behaviour, the influence of smoking history on new or changing symptoms, and lung cancer  
26 awareness and beliefs.

27  
28 A symptom sorting task was used to provide participants with a concrete visual task to increase  
29 engagement with the interview in the context of potential low literacy. The task formed a basis for  
30 discussion about symptom attribution and experience, where participants were asked to order 11  
31 symptoms from those they would go to the doctor with first, through to the last. The 11 symptoms  
32 were selected from the NICE guidance for referral of suspected lung cancer. The symptoms were re-  
33 worded to simplify the language in line with wording found on the NHS Choices website for lung  
34 cancer symptoms and any reference to time scale of symptoms was removed (Supplementary file 2).



1  
2  
3 1 For example, a cough that lasts for 3 weeks or more was amended to 'persistent cough', and  
4 2 haemoptysis was amended to 'coughing up blood'. The presentation order of the symptoms was  
5 3 rotated between interviews.  
6  
7 4

8  
9 5 To explore potential lung cancer symptom attribution outside of a cancer context, there was no  
10 6 mention of cancer in the study information packs or when participants completed the symptom  
11 7 sorting task. If appropriate, participants were asked questions to explore lung cancer awareness and  
12 8 beliefs at the end of the interview or when participants discussed lung cancer unprompted.  
13  
14 9

15  
16  
17 10 Demographic data were collected using a short questionnaire, including three additional measures  
18 11 of socioeconomic group: age, gender, smoking status (quantity and duration), home ownership,  
19 12 occupation and educational attainment. Interviews were conducted until data saturation (no new  
20 13 themes emerging[36]).  
21  
22 14

23  
24  
25 15 **Focus groups.** Healthcare professionals (i.e. GP, nurse, community pharmacist) and community  
26 16 partners (i.e. community worker) who work in areas of deprivation, and with people with smoking  
27 17 history and/or lung conditions were sent information about the study and invited to take part in the  
28 18 focus group. A mutually convenient time, date and location for the focus groups was agreed. The  
29 19 focus groups were conducted using a semi-structured topic guide to explore preferences for an  
30 20 intervention to promote earlier lung cancer diagnosis. Separate topic guides were used for the public  
31 21 and professional groups. Topics for discussion were: preferred format of the intervention,  
32 22 recommendations for intervention content, preferred location and facilitator for intervention  
33 23 delivery, and recommendations for the inclusion of smoking cessation advice.  
34  
35 24

### 25 **Setting**

26 26 Most interviews (n=34) took place face-to-face in participant's own homes, with three taking place in  
27 27 a café, local community centre or over the telephone, and lasted between 46 and 146 minutes  
28 28 (mean 83 minutes). Family members were present for three interviews but did not participate in the  
29 29 study. Focus groups took place in primary care settings (n=2) or local community centres (n=2).  
30 30 Members of the public who took part in the interviews or focus groups were given a £10 shopping  
31 31 voucher to thank them for their time. Healthcare professionals and community partners were not  
32 32 reimbursed for their time.  
33  
34 33

1  
2  
3 1 Interviews and focus groups in England were conducted by JH (PhD), a trained and experienced  
4 2 female qualitative Research Fellow and Medical Sociologist. The Welsh and Scottish interviews and  
5 3 focus groups were conducted by GM (PhD), a female Health Psychologist and trained qualitative  
6 4 Research Associate.  
7  
8  
9

## 10 6 **Data analysis**

11  
12 7 Interviews and focus groups were audio-recorded and transcribed verbatim. Anonymised transcripts  
13 8 were analysed in detail using the Framework method[37]. The data were analysed in five stages:  
14 9 familiarisation, identification of a thematic framework, indexing, charting, and interpretation. A  
15 10 separate index was created on Microsoft Excel for the interview and focus group data; however,  
16 11 wherever possible, overlap was coded using the same indexing terms, for example 'barriers to  
17 12 symptom presentation' was commonly discussed in both the interview and focus groups. The index  
18 13 was developed by two researchers (GM and JH). Themes were generated independently and  
19 14 consolidated through discussion in nine interpretation workshops over a nine month period by GM  
20 15 and JH. The different perspectives of the researchers as noted above was a benefit during analysis  
21 16 and interpretation. Field notes were recorded for each interview and focus group, and incorporated  
22 17 into discussion during the analysis workshops. Interpretive themes were generated by JH and GM,  
23 18 and developed with all authors in monthly management meetings. Transcripts and study findings  
24 19 were not checked by participants; however, all participants were mailed a summary of the study  
25 20 findings.  
26  
27  
28  
29  
30  
31  
32  
33  
34  
35

## 36 22 **Ethical approval**

37 23 The study received ethical approval from Southampton Central- Hampshire A Research Ethics  
38 24 Committee (16/SC/0589).  
39  
40  
41

42 26 **Patient and public involvement.** Patient and public representatives (AMT and GN) were involved in  
43 27 the design of the study and interpretation of study findings in monthly management group  
44 28 meetings. All study materials and topic guides were developed with lay input (AMT and GN) and  
45 29 written to a reading age of 10 years due to potentially low literacy.  
46  
47  
48  
49  
50  
51  
52  
53  
54  
55  
56  
57  
58  
59  
60

## RESULTS

### Interviews

Seventy-eight returned the study reply slip and declined to participate in the study; reasons for refusal unknown. The majority of our sample were female, current smokers, and with a mean age of 65 years (Table 1). Most had a diagnosis of COPD. All 37 participants resided in the lowest quintile of deprivation for their respective country, of whom 15 were in the most deprived decile. Most participants had left school before age 15 with no formal qualifications, lived in social housing, and claimed disability benefit or job seekers allowance.

**Table 1. Qualitative interview sample characteristics**

| Sample characteristics                               | Total n=37   |
|------------------------------------------------------|--------------|
| <b>Gender</b>                                        |              |
| Male                                                 | 16           |
| Female                                               | 21           |
| <b>Age, years</b>                                    |              |
| Mean (range)                                         | 64.7 (48-84) |
| <b>Smoking status</b>                                |              |
| Current smoker                                       | 18           |
| Occasional smoker                                    | 3            |
| Former smoker, recent quitter (within five years)    | 5            |
| Former smoker (quit over five years ago)             | 11           |
| <b>Deprivation decile<sup>†</sup></b>                |              |
| <b>Welsh Index of Multiple Deprivation (WIMD)</b>    |              |
| Decile 1 (most deprived 10%)                         | 5            |
| Decile 2 (most deprived 10-20%)                      | 10           |
| <b>Scottish Index of Multiple Deprivation (SIMD)</b> |              |
| Decile 1 (most deprived 10%)                         | 4            |
| Decile 2 (most deprived 10-20%)                      | 12           |
| <b>English Index of Multiple Deprivation (IMD)</b>   |              |
| Decile 1 (most deprived 10%)                         | 6            |
| <b>Self-reported lung condition</b>                  |              |
| COPD                                                 | 26           |
| Chronic bronchitis                                   | 2            |
| Chronic emphysema                                    | 2            |
| Occupational lung disease                            | 1            |
| Unsure of diagnosis                                  | 4            |
| Missing                                              | 2            |
| <b>Educational attainment</b>                        |              |
| Left school at/before age 15                         | 29           |
| Completed CSEs, O-Levels or equivalent               | 5            |
| Completed A levels or equivalent                     | 1            |
| Completed further education but not degree           | 1            |
| Missing                                              | 1            |

|                                               |    |
|-----------------------------------------------|----|
| <b>Employment</b>                             |    |
| Employed full-time                            | 2  |
| Employed part-time                            | 1  |
| Casual work                                   | 1  |
| Job seekers or disability benefit             | 17 |
| Retired                                       | 16 |
| <b>Home/living arrangement</b>                |    |
| Own flat/house                                | 14 |
| Rent from local authority/housing association | 21 |
| Rent privately                                | 1  |
| Missing                                       | 1  |

\*Calculated using participant postcode and local authority data

Key themes were: strategies involved in symptom detection and help seeking behaviour, fixation on maintaining short term health, denial and avoidance of longer term health, the desire to be a model patient, and the importance of the relationship with their healthcare professional. See Figure 1 for illustrative quotes.

### ***Symptom detection strategies and help seeking***

Lung cancer symptoms were viewed as “part and parcel” (male, 68, England, current smoker) of their lung condition, other pre-existing comorbidities or smoking habit, and were consequently normalised and perceived not to require medical help. Changes to vague or respiratory-type lung cancer symptoms were only taken seriously when remarked on by friends and family or when they impacted on daily life.

Symptoms that could indicate a chest infection were constantly monitored. Participants used sophisticated strategies such as noticing changes in the colour and consistency of their phlegm or subtle audible changes in their cough to actively detect chest infections. Such strategies were used to facilitate early detection and treatment for chest infections through their primary care provider or with rescue packs (emergency packs of steroids and antibiotics that can be kept at home), due to lung condition.

Constant monitoring of phlegm for control of lung condition meant that participants could and would notice haemoptysis, but few reported actively looking for haemoptysis. Disparity between actual and anticipated medical help seeking was found for haemoptysis. Most participants had not previously experienced haemoptysis, but would anticipate seeking medical help immediately due to

1 the potentially serious nature of blood. However, some participants who had previously or were  
2 currently experiencing haemoptysis reported normalisation, leading to delays in medical help  
3 seeking or no help seeking.

#### 4 5 ***Focus on maintaining short term health***

6  
7 When symptoms were easy to detect, they were attributed to what was perceived as a treatable  
8 cause and represented an immediate health threat i.e. a chest infection due to lung condition,  
9 participants sought medical help quickly. Participants could often request an appointment the same  
10 day as permitted by their GP surgery policies. Prompt help seeking was due to fear of not being able  
11 to breathe and the potentially life-threatening nature of chest infections, and is likely to reflect the  
12 need to maintain good health in the short term.

13  
14 The focus on maintaining short term health may reflect low general expectations of health, where  
15 some participants were surprised to live past 60 years of age. In addition, due to fear of potentially  
16 hearing bad news, some participants expressed a preference to not ask questions during a  
17 consultation or yearly review with the nurse. Furthermore, our highly deprived sample prioritised  
18 day-by-day living over longer term planning, thereby focusing on health in the short term.

#### 19 20 ***Denial or avoidance of long term health outcomes***

21  
22 Most participants were sceptical of the link between lung cancer and smoking. Conversely,  
23 participants thought that lung cancer was inevitable due to their current or former lifestyle,  
24 including smoking history, working conditions and the reported incidence of lung cancer in their  
25 community. Beliefs about inevitability were often coupled with highly negative fearful and fatalistic  
26 beliefs about lung cancer, with no cure and eventual death. Such claims were evidenced by a high  
27 proportion of friends and family who were diagnosed with lung cancer and often died. A few  
28 participants discussed that a cure for lung cancer involved luck or was 'some miracle' (male, 56,  
29 Wales, occasional smoker), reflecting a perceived lack of control over early detection and treatment.  
30 Consequently, actual or anticipated medical help seeking for lung cancer symptoms was motivated  
31 by pain, or to seek a diagnosis and prognosis to notify family members. However, some participants  
32 would anticipate refusal of treatment or even contemplate suicide.

1 We found differences in how participants with and without dependent family responded to  
2 symptoms of lung cancer. Female participants with dependent children or grandchildren were all  
3 motivated to visit the doctor with symptoms suggestive of lung cancer, in order to receive a  
4 prognosis to enable childcare arrangements after death. Women with dependent children who held  
5 more positive beliefs about lung cancer treatment would seek help for treatment to 'stay healthy'  
6 and prolong life. Participants with no dependent family would be more likely to ignore lung cancer  
7 symptoms, or seek medical help if in pain but refuse treatment.

### 8 9 ***The model patient***

10  
11 Participants discussed a sense of lack of entitlement to health services due to smoking habit, where  
12 respiratory-type symptoms of lung cancer were perceived as self-inflicted. For some, this was  
13 reinforced by an actual or expected 'smoking lecture' each time they sought medical help; the  
14 lecture made participants feel ostracised, particularly when smoking was used as a coping  
15 mechanism and contributed to not feeling worthy of seeking medical help. Some participants  
16 perceived that they may be treated differently by health professionals because they live in an area of  
17 deprivation, and discussed a potential power imbalance during consultations.

18  
19 Conversely, participants were highly critical of people who were perceived to waste, exploit and  
20 overuse NHS resources. They cited drug addicts, illegitimate benefits claimers, older people wanting  
21 social interaction, and people with coughs and colds as over users of the health service. Such beliefs  
22 may reflect a downward comparison to other more stigmatised service users to legitimise their own  
23 help seeking. In order to be considered a model and non-problem patient, participants legitimise  
24 their own help seeking only when absolutely necessary - and often after trying their 'own cures' i.e.  
25 cough medicine from the pharmacist - to not burden the doctors. Infrequent attenders or 'good  
26 service users' felt a sense of superiority for being a model patient.

### 27 28 ***Relationship with the healthcare professional***

29  
30 Some participants disclosed traumatic events in their lives including physical and sexual abuse,  
31 leading to tobacco dependence and alcohol addiction. In addition, more than half of the sample  
32 described symptoms of depression and anxiety. Therefore, the relationship with their healthcare  
33 professional was important when considering whether to present with lung symptoms; to feel

1 understood by the healthcare professional, with their personal history taken into account in the  
2 context of health behaviour such as smoking.

3  
4 Those who felt comfortable, safe and not judged by their chosen healthcare professional felt  
5 encouraged to present with symptoms. Some participants were prepared to wait up to three weeks  
6 for an appointment with their preferred healthcare professional to discuss worrisome and  
7 potentially serious symptoms that could indicate lung cancer. Many participants reported problems  
8 with maintaining continuity of care, highlighting problems with the stretched National Health  
9 Service.

10  
11 **[insert Figure 1 here, currently on an additional file]**

### 12 **Focus groups**

13  
14  
15 Two public focus groups were conducted in Wales and England, respectively. Most participants were  
16 female and former smokers, and all participants were diagnosed with a lung condition. Two  
17 professional focus groups were conducted in Wales. Most participants were female, and were  
18 medical professionals (Table 2).

19  
20 **Table 2. Focus group characteristics**

| Members of the public                               | N participants   | Healthcare professionals and community partners | N participants   |
|-----------------------------------------------------|------------------|-------------------------------------------------|------------------|
| <b>Group 1, England</b>                             | <b>total n=7</b> | <b>Group 3, Wales</b>                           | <b>total n=5</b> |
| <i>Gender</i>                                       |                  | <i>Gender</i>                                   |                  |
| Female                                              | 6                | Female                                          | 2                |
| Male                                                | 1                | Male                                            | 3                |
| <i>Smoking status</i>                               |                  | <i>Occupation</i>                               |                  |
| Current smoker                                      | 3                | Community nurse                                 | 1                |
| Former smoker                                       | 3                | Support group facilitator                       | 1                |
| Never smoker                                        | 1                | Community partner                               | 1                |
| <i>Self-reported lung condition</i>                 |                  | Third sector representative                     | 1                |
| COPD                                                | 7                | Public health representative                    | 1                |
| Recruited through Primary Care and community groups |                  | Recruited through the Health Board              |                  |
| <b>Group 2, Wales</b>                               | <b>total n=9</b> | <b>Group 4, Wales</b>                           | <b>total n=7</b> |
| <i>Gender</i>                                       |                  | <i>Gender</i>                                   |                  |
| Female                                              | 5                | Female                                          | 6                |
| Male                                                | 4                | Male                                            | 1                |
| <i>Smoking status</i>                               |                  | <i>Occupation</i>                               |                  |
| Current smoker                                      | 3                | Practice manager                                | 1                |

|                                     |   |                                                     |   |
|-------------------------------------|---|-----------------------------------------------------|---|
| Former smoker                       | 4 | Pharmacist                                          | 1 |
| Never smoker                        | 2 | GP                                                  | 2 |
| <i>Self-reported lung condition</i> |   | Practice nurse                                      | 2 |
| COPD                                | 9 | Medical student                                     | 1 |
| Recruited through community groups  |   | Recruited through the Health Board/<br>Primary Care |   |

Key themes discussed were: barriers to early lung cancer detection, and preferences regarding the format and content of an intervention for the early detection of lung cancer. See Figure 2 for illustrative quotes.

### **Barriers to lung cancer symptom presentation**

The focus groups confirmed our interview findings, where fear of wasting the doctor's time with trivial symptoms and fear of being judged or lectured about smoking deterred medical help seeking for lung cancer symptoms. In addition, the health professional group supported our findings that patients with lung conditions tend to fixate on chest infections. However, we found disparity between the patient-reported experience of the GP's approach to smoking and the healthcare professional reported approach to smoking cessation. Healthcare professionals in Wales discussed new guidance that discourages health professionals from 'lecturing' patients, suggesting the patient reported experience may be based on previous healthcare interactions, and they consequently anticipate a lecture.

### **Potential format of an intervention to support earlier lung cancer detection**

All groups discussed a preference for community based interventions, away from a traditional healthcare setting, for example a community event, talk in a community venue or health check bus, similar to breast screening mobile units. The anonymous and relaxed nature of such an intervention meant that intervention participants would feel they were not wasting GP time; rather it would act as a signal that their attendance at the event was desired. Participants compared this to a visit to the doctor, where they felt they were wasting the GP's time because they were not invited to attend. It was considered important that the intervention facilitator was knowledgeable or trained, non-judgemental, easy to talk to and approachable. Participants suggested a nurse, pharmacist, trained patient representative or community worker.



## 1 Intervention content

2  
3  
4  
5  
6 The public groups requested more information about the symptoms of lung cancer. However, the  
7 healthcare professional groups felt that current lung cancer symptom information was too broad,  
8 leading to dismissal and potentially denial of lung cancer information because people with smoking  
9 history or comorbid lung conditions experience most of the symptoms daily. To overcome this  
10 problem, the healthcare professionals groups discussed the need for more specific symptom  
11 information, emphasising changes to normal symptoms and coupled with information about risk  
12 factors for lung cancer.  
13  
14

15  
16  
17  
18 To modify negative beliefs about lung cancer, the health professionals groups suggested using  
19 positive stories to communicate messages about the importance of lung cancer early diagnosis and  
20 highlight the potential for survival outcomes with early stage detection.  
21  
22

23  
24  
25 The inclusion of smoking cessation information in a lung cancer intervention was considered  
26 important by all groups. However, the manner in which smoking cessation could be approached was  
27 discussed as key to effective promotion of smoking cessation. Participants suggested highlighting the  
28 benefits of stopping smoking in a gentle and relaxed manner to encourage choice to quit.  
29  
30

31  
32  
33 **[insert Figure 2 here, currently on an additional file]**  
34  
35

## 36 DISCUSSION

37  
38 Our study was the first to explore the influences on lung cancer symptom presentation and  
39 intervention preferences in high risk, highly deprived groups across three nations of the UK. We  
40 found evidence from the interviews and focus groups that individuals who are high risk for lung  
41 cancer fixate on maintaining health in the short term. Prioritising the daily management of their lung  
42 condition led to avoidance of longer term health problems such as lung cancer, to gain a sense of  
43 control over health in the context of difficult personal circumstances. Health beliefs were found to  
44 underpin behaviour in relation to medical help seeking, where perceptions of 'inevitable but curable'  
45 chest infections led to immediate help seeking. However, 'inevitable but incurable' lung cancer led  
46 to inaction when faced with potentially serious symptoms and anticipated refusal of treatment.  
47 Interview participants felt that the relationship with the healthcare professional was key when  
48 considering medical help seeking. The importance of the interaction between provider and patient  
49 was mirrored in the focus groups, where participants felt that a non-judgemental intervention  
50  
51  
52  
53  
54  
55  
56  
57  
58  
59  
60

1  
2  
3 1 facilitator was important. Multi-faceted community-based interventions, away from the traditional  
4 healthcare setting, were preferred by participants.  
5  
6 3

7 4 A major strength of this study was the rigorous sampling procedures. We screened postcodes to  
8 ensure participants resided in the lowest quintile of deprivation, and measured multiple additional  
9 indicators of deprivation. Individual and area level indicators confirm that our sample was highly  
10 deprived, for instance most were unemployed and seeking benefits, and rented social housing. In  
11 addition, we recruited participants with no previous diagnosis of lung cancer, without mention of  
12 lung cancer until discussed by participants during the interview, or at the end of the interview. These  
13 recruitment and interview procedures meant we were able to explore actual and anticipated lung  
14 cancer symptom presentation in those who were symptomatic or asymptomatic. This strategy was  
15 employed to overcome the methodological limitations associated with studying either retrospective  
16 or anticipated symptom presentation in isolation[15]. Although we carefully sampled participants  
17 and collected additional demographic measures to validate our sampling frame, we were unable to  
18 conduct a focus group in Scotland due to low response, which is a potential limitation of the study.  
19 In addition, focus group participants were recruited opportunistically, with the potential that  
20 participants were more favourably disposed to an intervention.  
21  
22 18

23 19 Previous empirical studies report prolonged lung cancer symptom presentation due to  
24 misattribution[5,13,15-26,33,38,39] and in our study, we found evidence that participants  
25 normalised their lung cancer symptoms to smoking habit, and lung and other comorbid conditions.  
26 In contrast to previous studies that report haemoptysis as a facilitator to prompt medical help  
27 seeking[13,25,27,40-42], participants with experience of haemoptysis reported prolonged medical  
28 help seeking or described avoidant coping, and normalisation when blood was noticed. Denial and  
29 normalisation of haemoptysis may be specific to socioeconomically deprived groups. Our highly  
30 deprived sample reported daily struggles with complex physical and mental health needs, and with  
31 the challenges associated with living on no or limited income. Previous studies in socioeconomically  
32 deprived communities report that in the context of competing life demands, health was dealt with  
33 reactively and with low priority[43,44].  
34  
35 30

36 31 In addition, fear of being ineligible for treatment due to lifestyle, has the potential to deter medical  
37 help seeking in deprived groups, conceptualised as Candidacy[44]. The underlying concept of health  
38 service Candidacy[44] may explain why participants described feeling unworthy of seeking medical  
39 help. In addition to challenging life circumstances, interview and focus group participants reported  
40  
41  
42  
43  
44  
45  
46  
47  
48  
49  
50  
51  
52  
53  
54  
55  
56  
57  
58  
59  
60

1  
2  
3 1 fear of being judged and ignored by health professionals due to their smoking habit or social  
4 2 standing, contributing to perceptions of unworthiness. Furthermore, participants reported the  
5 3 desire to be a model patient and to not waste valuable GP time, which influenced medical help  
6 4 seeking. Although the desire to be a 'good citizen' has previously been reported[24,25], to our  
7 5 knowledge, the current study was the first to explore perceptions of appropriate consultation  
8 6 behaviour in a highly deprived sample. Our emerging findings related to Candidacy, combined with  
9 7 the desire to exhibit 'good' consultation behaviour, may contribute to normalisation of symptoms  
10 8 previously regarded as serious and therefore discourage help seeking. Consequently, high risk, highly  
11 9 deprived participants are likely to focus on health in the short term, and ignore longer-term health  
12 10 issues which may lead to advanced stage lung cancer diagnosis.

11  
12 We found that participants held seemingly contradictory views of their lung cancer susceptibility,  
13 13 reporting scepticism about the causal role of smoking in lung cancer alongside perceived inevitability  
14 14 of lung cancer. Beliefs about the link between smoking and lung cancer may reflect societal stigma  
15 15 towards smoking, where participants downplay the negative effects of smoking, possibly to  
16 16 legitimise medical help seeking for symptoms considered related to smoking. Perceived inevitability  
17 17 of lung cancer is likely to reflect the high proportion of people that our sample of deprived  
18 18 participants knew with lung cancer, as a consequence of high lung cancer incidence in areas of  
19 19 deprivation. Perceived inevitability for lung cancer has previously been reported to minimise  
20 20 normalisation of lung cancer symptoms and prompt help seeking[45]. However, we report  
21 21 normalisation and ignoring of haemoptysis, possibly due to a combination of high fear and fatalism  
22 22 of lung cancer, difficult life circumstances and low perceived health service Candidacy. Furthermore,  
23 23 our findings raise questions of perceived social justice as influences on medical help seeking. High-  
24 24 risk individuals who believe that they cannot legitimately seek medical help because of their former  
25 25 or current lifestyle may therefore be resigned to the prospect of developing lung cancer.

### 26 27 **Practice and policy implications**

28  
29 With a comorbid lung condition and smoking history, those who are high risk for lung cancer will, in  
30 30 the main, be symptomatic. Therefore, as suggested by the focus groups, it is important to highlight  
31 31 the significance of changing and multiple symptoms in an intervention, to avoid normalisation. High  
32 32 risk individuals should be empowered to seek timely medical help and made to feel welcome, not  
33 33 judged or blamed for their current or former lifestyle. For instance, as suggested in the focus groups,  
34 34 interventions targeted at deprived groups could be conducted outside of a traditional healthcare

1 setting and out to the community with non-judgemental facilitators. Our findings highlight the  
2 importance of an intervention where participants would be invited to attend, as opposed to the  
3 patient attending the GP surgery. An invitation may help to eliminate any potential perceptions of  
4 wasting GP time and make their attendance feel valued.

5  
6 Over half of the current sample described mental health problems and/or difficult current or former  
7 life circumstances. Intervention developers and HCPs in highly deprived communities should be  
8 aware of these wider social and contextual factors, and receive training to safeguard themselves. In  
9 addition, facilitators and HCPs should know how and where to appropriately signpost intervention  
10 participants who disclose difficult circumstances. Finally, the current UK health system potentially  
11 encourages patients with a lung condition to focus on short term management of their condition. GP  
12 prescribing of antibiotics and the use of rescue packs may inadvertently reinforce patients to detect  
13 and act on symptoms of a chest infection. There is potential that this current standard of care could  
14 be adapted to educate and encourage patients with a lung condition to detect symptoms of lung  
15 cancer, thereby shifting the focus to longer term health. More research is required to understand  
16 how to motivate highly deprived groups to consider health in the long term, while recognising the  
17 wider social determinants of health[46].

## 18 19 **Conclusion**

20  
21 The challenges of living in an area of deprivation with social exclusion issues, combined with fear of  
22 judgement by health professionals, contribute to denial and ignoring of lung cancer symptoms.  
23 Multi-faceted community based interventions are required to highlight lung cancer symptoms, the  
24 importance of early diagnosis and empower people who are high risk for lung cancer to seek timely  
25 medical help.

1  
2  
3 1 **Additional information**

4  
5 2  
6 3 **Ethics approval and consent to participate**

7 4 The study received ethical approval from Southampton Central- Hampshire A Research Ethics  
8 5 Committee (16/SC/0589). Written informed consent was obtained from all participants who took  
9 6 part in the study.  
10 7

11 8 **Consent for publication**

12 9 Not applicable  
13 10

14 11 **Data sharing**

15 12 Qualitative data is not publicly available for this study to maintain participant confidentiality.  
16 13

17 14 **Competing interests**

18 15 The authors confirm that there are no conflicts of interest.  
19 16

20 17 **Funding**

21 18 This work was supported by Cancer Research UK (grant reference number: C16377/A22034).  
22 19

23 20 **Author contributorship**

24 21 All authors designed the study. GM and JH conducted, coded and analysed the interviews and focus  
25 22 group data. All authors contributed to the interpretation of data. GM drafted the manuscript and all  
26 23 authors contributed to the review and editing of the manuscript. All authors read and approved the  
27 24 final manuscript.  
28 25

29 26 **Acknowledgements**

30 27 We would like to thank everyone who helped with recruitment for this study, and all the participants  
31 28 who took part in the study; without these individuals this study would not have been possible. We  
32 29 would like to thank the Advisory Group (Anthony Byrne, Gareth Collier, Adrian Edwards, Dyfed  
33 30 Huws, David Lewis, Maura Matthews and Fiona Walter) and the study Administrator Lucy Watkins,  
34 31 for their ongoing support and advice throughout the study.  
35 32  
36 33  
37 34

## 1 References

- 2
- 3
- 4
- 5
- 6 1. Fitzmaurice C, Allen C, Barber RM, *et al*. Global, Regional, and National Cancer Incidence, Mortality, Years of Life Lost, Years Lived With Disability, and Disability-Adjusted Life-years for 32 Cancer Groups, 1990 to 2015: A Systematic Analysis for the Global Burden of Disease Study. *JAMA oncol* 2017;**3**(4):524-48. doi: 10.1001/jamaoncol.2016.5688.
- 7 2. CRUK. Lung Cancer Survival Statistics. *Cancer Research UK*. 2018. Available at: <http://www.cancerresearchuk.org/health-professional/cancer-statistics/statistics-by-cancer-type/lung-cancer#heading-Two> [accessed 04.06.2018]
- 8 3. McPhail S, Johnson S, Greenberg D, *et al*. Stage at diagnosis and early mortality from cancer in England. *BJC* 2015;**112**(1):108-15. doi: 10.1038/bjc.2015.49.
- 9 4. Barrett J, Hamilton W. Pathways to the diagnosis of lung cancer in the UK: a cohort study. *BMC Med Prac*. 2008;**9**(31). doi: 10.1186/1471-2296-9-31.
- 10 5. Mitchell ED, Rubin G, Macleod U. Understanding diagnosis of lung cancer in primary care: qualitative synthesis of significant event audit reports. *BJGP* 2013;**63**(606):37-46. doi: 10.3399/bjgp13X660760.
- 11 6. Lyratzopoulos G, Neal RD, Barbiere J, *et al*. Variation in number of general practitioner consultations before hospital referral for cancer: findings from the 2010 National Cancer Patient Experience Survey in England. *Lancet Oncol* 2012;**13**(4):353-65. doi: 10.1016/S1470-2045(12)70041-4.
- 12 7. Iyen-Omofoman B, Tata L, Baldwin DR, *et al*. Using socio-demographic and early clinical features in general practice to identify people with lung cancer earlier. *Thorax* 2012;**68**:451-9.
- 13 8. Hipsley-Cox J, Coupland C. Identifying patients with suspected lung cancer in primary care: derivation and validation of an algorithm. *BJGP* 2011;**61**(592):715-23. doi: 10.3399/bjgp11X606627.
- 14 9. NICE. NICE guidelines for lung cancer: diagnosis and management. *NICE*. 2015. Available at: <https://www.nice.org.uk/guidance/cg121> [accessed 04.06.2018].
- 15 10. National Cancer Registration and Analysis Service. Cancer by deprivation in England: 1996-2011. 2014. Available at: [http://www.ncin.org.uk/about\\_ncin/cancer\\_by\\_deprivation\\_in\\_england](http://www.ncin.org.uk/about_ncin/cancer_by_deprivation_in_england) [accessed 04.06.2018].
- 16 11. Sekine Y, Katsura H, Koh E, *et al*. Early detection of COPD is important for lung cancer surveillance. *Eur Resp J* 2012;**39**(5):1230-40. doi: 10.1183/09031936.00126011.
- 17 12. Malhotra J, Malvezzi M, Negri E, *et al*. Risk factors for lung cancer worldwide. *Eur Resp J* 2016;**48**:899-902. doi: 10.1183/13993003.00359-2016.

- 1  
2  
3 1 13. Smith SM, Campbell NC, MacLeod U *et al*. Factors contributing to the time taken to consult  
4 2 with symptoms of lung cancer: a cross-sectional study. *Thorax* 2009;**64**(6):523-31.  
5  
6 3 14. Friedemann-Smith C, Whitaker K, Winstanley K, Wardle J. Smokers are less likely than non-  
7 4 smokers to seek help for a lung cancer 'alarm' symptom. *Thorax* 2016;**71**(7).  
8 5 doi.org/10.1136/thoraxjnl-2015-208063  
9  
10 6 15. Brouselle A, Breton M, Benhadj L *et al*. Explaining time elapsed prior to cancer diagnosis:  
11 7 patients' perspectives. *BMC Health Serv Res* 2017;**17**(1):448. doi: 10.1186/s12913-017-2390-1.  
12 13  
14 8 16. McLachlan S, Mansell G, Sanders T *et al*. Symptom perceptions and help-seeking behaviour  
15 9 prior to lung and colorectal cancer diagnoses: a qualitative study. *Fam Pract*. 2015;**32**(5):568-77.  
16 10 doi: 10.1093/fampra/cmz048.  
17 18  
18 11 17. Caswell G, Seymour J, Crosby V *et al*. Lung cancer diagnosed following an emergency  
19 12 admission: exploring patient and carer perspectives on delay in seeking help. *Sup Care Cancer*  
20 13 2017;**25**(7):2259-66. doi: 10.1007/s00520-017-3633-8.  
21 22  
23 14 18. Brindle L, Pope C, Corner J, *et al*. Eliciting symptoms interpreted as normal by patients with  
24 15 early-stage lung cancer: could GP elicitation of normalised symptoms reduce delay in diagnosis?  
25 16 Cross-sectional interview study. *BMJ Open* 2012;**2**(6):1977. doi.org/10.1136/bmjopen-2012-001977.  
26 27  
28 17 19. Lyratzopoulos G, Vedsted P, Singh H. Understanding missed opportunities for more timely  
29 18 diagnosis of cancer in symptomatic patients after presentation. *BJC* 2015;**112**(1):84-91. doi:  
30 19 10.1038/bjc.2015.47.  
31 32  
32 20 20. Emery JD, Walter FM, Gray V *et al*. Diagnosing cancer in the bush: a mixed-methods study of  
33 21 symptom appraisal and help-seeking behaviour in people with cancer from rural Western Australia.  
34 22 *Fam Pract* 2013;**30**(5):541-50. doi: 10.1093/fampra/cms087.  
35 36  
36 23 21. Birt L, Hall N, Emery J *et al*. Responding to symptoms suggestive of lung cancer: a qualitative  
37 24 interview study. *BMJ Open* 2014;**11**(1);doi: 10.1136/bmjresp-2014-000067.  
38 39  
39 25 22. Chatwin J, Sanders C. The influence of social factors on help-seeking for people with lung  
40 26 cancer. *Eur J Cancer Care*. 2013;**22**(6):709-13. doi: 10.1111/ecc.12078.  
41 42  
42 27 23. Carter-Harris L. Lung Cancer Stigma as a Barrier to Medical Help-Seeking Behavior: Practice  
43 28 Implications. *J Am Assoc Nurse Pract* 2015;**27**(5):240-5. doi: 10.1002/2327-6924.12227.  
44 45  
45 29 24. Tod A, Craven J, Allmark P. Diagnostic delay in lung cancer: a qualitative study. *J Adv Nurs*  
46 30 2008;**61**(3):336-43. doi: 10.1111/j.1365-2648.2007.04542.x.  
47 48  
48 31 25. Tod A, Joanne R. Overcoming delay in the diagnosis of lung cancer: a qualitative study. *Nurs*  
49 32 *Standard* 2010;**24**(31):34-43. doi: 10.7748/ns2010.04.24.31.35.c7690.  
50 51  
51 33 26. Corner J, Hopkinson J, Roffe L. Experience of health changes and reasons for delay in seeking  
52 34 care: a UK study of the months prior to the diagnosis of lung cancer. *Thorax* 2006;**60**:1382-91.  
53  
54  
55  
56  
57  
58  
59  
60

- 1  
2  
3 1 27. Braybrook DE, Witty KR, Robertson S. Men and lung cancer: a review of the barriers and  
4 2 facilitators to male engagement in symptom reporting and screening. *J Men's Health* 2011;**8**(2):93-9.  
5 3 <https://doi.org/10.1016/j.jomh.2011.03.002>.
- 6 4 28. Chapple A, Ziebland S, McPherson A. Stigma, shame, and blame experienced by patients  
7 5 with lung cancer: qualitative study. *BMJ* 2004;**328**:1470. doi.org/10.1136/bmj.38111.639734.7C.
- 8 6 29. Murray SA, Kutzer Y, Habgood E *et al*. Reducing barriers to consulting a General Practitioner  
9 7 in patients at increased risk of lung cancer: a qualitative evaluation of the CHEST Australia  
10 8 intervention. *Fam Pract* 2017;**34**(6):740-6. doi.org/10.1093/fampra/cmz057.
- 11 9 30. Marlow LA, Waller J, Wardle J. Does lung cancer attract greater stigma than other cancer  
12 10 types? *Lung Cancer* 2015;**88**(1):104-7. doi: 10.1016/j.lungcan.2015.01.024.
- 13 11 31. Quaife S, McEwen A, James S, Wardle J. Smoking is associated with pessimistic and avoidant  
14 12 beliefs about cancer: results from the International Cancer Benchmarking Partnership. *BJC*. 2015  
15 13 **112**(11):1799-804. doi: 10.1038/bjc.2015.148.
- 16 14 32. Quaife S, Marlow L, McEwen A, Wardle J. Attitudes towards lung cancer screening in  
17 15 socioeconomically deprived and heavy smoking communities: informing screening communication.  
18 16 *HEX* 2017;**20**(4):563-73. doi: 10.1111/hex.12481.
- 19 17 33. Mor V, Masterson-Allen S, Goldberg R, *et al*. Pre-diagnostic symptom recognition and help  
20 18 seeking among cancer patients. *J Community Health* 1990;**15**(4):253-66.
- 21 19 34. Tong A, Sainsbury P, Craig J. Consolidated criteria for reporting qualitative research (COREQ):  
22 20 a 32-item checklist for interviews and focus groups. *Int J Quality Health Care* 2007;**19**(6):349-57.
- 23 21 35. Leventhal H, Brissette I, Leventhal E. The common-sense model of self-regulation of health  
24 22 and illness. In: *The Self-regulation of Health and Illness Behaviour*. Routledge. 2003:42-65.
- 25 23 36. Francis JJ, Johnston M, Robertson C *et al*. What is an adequate sample size? Operationalising  
26 24 data saturation for theory-based interview studies. *Psych Health* 2010;**25**(10):1229-45. doi:  
27 25 10.1080/08870440903194015.
- 28 26 37. Ritchie LD, Lewis J. *Qualitative Research Practice: A Guide for Social Science Students and*  
29 27 *Researchers*. Sage: London. 2003.
- 30 28 38. Hall SE, Holman CD, Threlfall *et al*. Lung Cancer: An exploration of patient and general  
31 29 practitioner perspectives on the realities of care in rural Western Australia. *Aus J Rural Health*  
32 30 2008;**16**:355-62. doi: 10.1111/j.1440-1584.2008.01016.x.
- 33 31 39. Anderson R, Paarup B, Vedsted P, *et al*. 'Containment' as an analytical framework for  
34 32 understanding patient delay: a qualitative study of cancer patients' symptom interpretation  
35 33 processes. *Soc Sci Med* 2010;**71**(2):378-85. doi: 10.1016/j.socscimed.2010.03.044.



- 1  
2  
3 1 40. Chan W, Clark A, Dervede U *et al.* Symptoms, delay to presentation and survival in lung  
4 2 cancer. *Thorax* 2016;**71**(3):80-1.  
5  
6 3 41. Corner J, Hopkinson J, Fitzsimmons D, *et al.* Is late diagnosis of lung cancer inevitable?  
7 4 Interview study of patients' recollections of symptoms before diagnosis. *Thorax* 2005;**60**:314-9.  
8 5 doi.org/10.1136/thx.2004.029264.  
9  
10 6 42. Dobson C, Russell A, Brown S, Rubin G. The role of social context in symptom appraisal and  
11 7 help-seeking among people with lung or colorectal symptoms: A qualitative interview study. *Eur J*  
12 8 *Cancer Care* 2018;**27**(2):e12815. doi: 10.1111/ecc.12815.  
13  
14 9 43. Smits S, McCutchan G, Wood F *et al.* Development of a Behavior Change Intervention to  
15 10 Encourage Timely Cancer Symptom Presentation Among People Living in Deprived Communities  
16 11 Using the Behavior Change Wheel. *Annals Beh Med.* 2016;**52**(6):474-488. doi: 10.1007/s12160-016-  
17 12 9849-x.  
18  
19 20 44. Dixon-Woods M, Cavers D, Agarwal S *et al.* Conducting a critical interpretive synthesis of the  
21 22 literature on access to healthcare by vulnerable groups. *BMC Med Res Method* 2006;**6**(35).  
23 24 doi.org/10.1186/1471-2288-6-35.  
25  
26 26 45. Macdonald S, Watt G, Macleod U. In search of the cancer candidate: can lay epidemiology  
27 17 help? *Soc Health Illness* 2013;**35**(4):575-91. doi: 10.1111/j.1467-9566.2012.01513.x.  
28  
29 18 46. Barton H, Grant M. A health map for the local human habitat. *J Royal Soc Promotion Health.*  
30 19 2006;**126**(6):252-3.  
31  
32  
33  
34  
35  
36  
37  
38

### 39 **Figure legends**

40 **Figure 1. Illustrative quotes (qualitative interviews)**

41 **Figure 2. Illustrative quotes (focus groups)**

42  
43  
44  
45  
46  
47  
48  
49  
50  
51  
52  
53  
54  
55  
56  
57  
58  
59  
60

Figure 1. Illustrative quotes (qualitative interviews)

| Theme                                                                                                                                                                                                                                                                                                                                       | Quote                                                                                                                                                                                                                                                                                                                                                                                                                                                                                                                                                                                                                                                                                                                                                                                                                                                                                                                                                                                                                                                                                                                                                                                                                                                                                                                     |
|---------------------------------------------------------------------------------------------------------------------------------------------------------------------------------------------------------------------------------------------------------------------------------------------------------------------------------------------|---------------------------------------------------------------------------------------------------------------------------------------------------------------------------------------------------------------------------------------------------------------------------------------------------------------------------------------------------------------------------------------------------------------------------------------------------------------------------------------------------------------------------------------------------------------------------------------------------------------------------------------------------------------------------------------------------------------------------------------------------------------------------------------------------------------------------------------------------------------------------------------------------------------------------------------------------------------------------------------------------------------------------------------------------------------------------------------------------------------------------------------------------------------------------------------------------------------------------------------------------------------------------------------------------------------------------|
| <p data-bbox="233 268 586 331"><b>Symptom detection strategies and help seeking</b></p> <p data-bbox="233 331 586 401">Friends and family notice symptoms</p> <p data-bbox="233 537 586 667">Sophisticated symptom detection strategies/ monitoring of chest infections</p> <p data-bbox="233 905 586 974">Normalisation of haemoptysis</p> | <p data-bbox="586 331 1349 468"><i>“My daughter might [notice changes to symptoms] cos she mentions it now and then...she’ll give me a dig and she’ll say ‘your breathing’s annoying me’. Cos it’s heavy breathing so. Then again there’s something wrong”</i> (Male, 48, Scotland, former smoker)</p> <p data-bbox="586 506 1349 800"><i>“If [phlegm is] white and bubbly it’s not a chest infection. It’s only when it goes green so you can tell yourself exactly how close you are to getting an infection... There’s just two different kinds of green spittle, if it’s fluorescent green then you’ve got an infection, normal antibiotics won’t work with me, if it’s the lighter green I’m fine with that one... it’s handy to look out for, because you can get the right medication at the right time...because if anything happens to me, there’s no one for my kids.”</i> (Female, 48, Scotland, current smoker)</p> <p data-bbox="586 837 1349 1037"><i>“Coughing up blood, I do actually get some of that I don’t know why, but it could be because of the ulcer thing and that...There again then well I do get like nosebleeds, and then I’m thinking the blood maybe coming inside and coming down, you swallow it see. So then that will come back up won’t it”</i> (Male, 62, Wales, former smoker)</p> |
| <p data-bbox="233 1037 586 1106"><b>Focus on maintaining health in the short term</b></p> <p data-bbox="233 1205 586 1274">Fear of bad news during a consultation</p>                                                                                                                                                                       | <p data-bbox="586 1037 1349 1173"><i>“I get worried about having chest infection, I get more worried about today or tomorrow rather than the future. The future that’s going ahead for us anyway. Lung cancer’s not an issue really”</i> (male, 50, Scotland, former smoker)</p> <p data-bbox="586 1205 1349 1373"><i>“I’m very poor in asking questions cos I don’t want to know the results. Simple as that...no I don’t ask when they say the oxygen [saturation] is alright I just think well it’s alright and it’s one thing less I haven’t got to worry about”</i> (Female, 69, Wales, former smoker)</p>                                                                                                                                                                                                                                                                                                                                                                                                                                                                                                                                                                                                                                                                                                           |
| <p data-bbox="233 1373 586 1442"><b>Denial and avoidance of long term health outcomes</b></p> <p data-bbox="233 1442 586 1541">Scepticism about the link between smoking and lung cancer</p> <p data-bbox="233 1677 586 1776">Perceived inevitability of lung cancer/ anticipate suicide</p>                                                | <p data-bbox="586 1442 1349 1646"><i>“You hear occasions where people who don’t smoke, who’ve never smoked. Well how do they get their lung cancer?...I’ve got [lung cancer] in my head, I’m probably going to get it, if I haven’t already got it because of the lifestyle I’ve had. Where I’ve worked and everything else, what I’ve worked with.”</i> (Male, 68, England, current smoker)</p> <p data-bbox="586 1677 1349 1845"><i>“[Lung cancer] is really, really on the forefront on the mind...I just think ‘oh god, please don’t let me get cancer’...I think if I was to get cancer, I’ve sometimes said to myself, I’d commit suicide. I would take a pill or something.”</i> (Female, 81, Scotland, current smoker)</p> <p data-bbox="586 1877 1349 1904"><i>“[Lung cancer] worries me but I’ve got proper problems to worry</i></p>                                                                                                                                                                                                                                                                                                                                                                                                                                                                           |

|                                                                                                             |                                                                                                                                                                                                                                                                                                                                                                                                                                                                                                                                                                                                                                                                                                                                              |
|-------------------------------------------------------------------------------------------------------------|----------------------------------------------------------------------------------------------------------------------------------------------------------------------------------------------------------------------------------------------------------------------------------------------------------------------------------------------------------------------------------------------------------------------------------------------------------------------------------------------------------------------------------------------------------------------------------------------------------------------------------------------------------------------------------------------------------------------------------------------|
| Avoidance of lung cancer due to social and contextual factors                                               | <p><i>about [carer for disabled son, problems with social services and benefits claims, insecurity of current council owned housing and problems with area of residence with 'junkies']. I won't worry about it until it's actually here. If I started worrying about eventualities I'd never get anywhere" (Female, 48, Scotland, current smoker)</i></p>                                                                                                                                                                                                                                                                                                                                                                                   |
| Lung cancer fatalism/ anticipated refusal of treatment                                                      | <p><i>"Until anything happened and I'm actually told that I've got [lung cancer], there's nothing I can do about it. I'm really a believer of what's in your cards is already written. So I don't look at anything like that...But if they told me it was cancer, I would go ok then, but I wouldn't take any of the treatments... if it's my time, it's my time. It just doesn't, I don't think I've got any more fight in me for all that. I think that would be the last straw for me. So I just live every day as it comes now, I don't really plan much. So I'm just living in the day, you know. Cos whatever happens, happens anyway." (Female, 49, Scotland, current smoker)</i></p>                                                 |
| Response to lung cancer symptom/ female with dependent family                                               | <p><i>"I don't think they can treat [lung cancer]. You've just got to accept it haven't you...I would go to the doctor [with a symptom], I think I would like to know how long I had. Not for me but for [my son] you know. For him...If it was just me I wouldn't want to know, but because I've got him, [I would] definitely...When I seen the blood I did think to myself, I flushed it away right away...I seen the blood and I thought no, and I thought I've got to, you know, because of [my son]. The only way I would want to know is because of him. If I was by myself I would just say, don't want to know...Can't just think about myself I've got to think about him as well." (Female, 68, Scotland, current smoker)</i></p> |
| <p><b>The model patient</b><br/>Perception of healthcare professionals attitude to smokers</p>              | <p><i>"You feel as though you're an alien because you smoke, you feel as so they just look at you and say 'urghh', you know" (Female, 52, Scotland, current smoker)</i></p>                                                                                                                                                                                                                                                                                                                                                                                                                                                                                                                                                                  |
| Critical of people who waste NHS resources                                                                  | <p><i>"I can guarantee if I went this Monday and go next Monday the same people are sitting there. I'm being honest, they're a drain on society on the NHS, but that's the way they live...these people that go there are not really ill, I think they're just seeking attention" (Male, 78, England, current smoker).</i></p>                                                                                                                                                                                                                                                                                                                                                                                                               |
| <p><b>Relationship with healthcare professional</b><br/>Disclosure of highly sensitive personal problem</p> | <p><i>"Some people are friendly and not stony faced...if [the HCP] can't even start a conversation with the simplest of ice breakers then how can people tell about pooping themselves when they're coughing up" (Female, 48, Scotland, current smoker)</i></p>                                                                                                                                                                                                                                                                                                                                                                                                                                                                              |
| Good relationship with GP                                                                                   | <p><i>"I'm alright with [one GP], you could tell her anything, I've shocked her sometimes" (Female, 51, England, current smoker)</i></p>                                                                                                                                                                                                                                                                                                                                                                                                                                                                                                                                                                                                     |

Figure 2. Illustrative quotes (focus groups)

| Theme                                                                                                                                                                            | Quote                                                                                                                                                                                                                                                                                                                                                                                                                                                                                                                                                                                                                                                                                                                                                                                                                                                                                                                                                                                                                                                                                                                                                                                                       |
|----------------------------------------------------------------------------------------------------------------------------------------------------------------------------------|-------------------------------------------------------------------------------------------------------------------------------------------------------------------------------------------------------------------------------------------------------------------------------------------------------------------------------------------------------------------------------------------------------------------------------------------------------------------------------------------------------------------------------------------------------------------------------------------------------------------------------------------------------------------------------------------------------------------------------------------------------------------------------------------------------------------------------------------------------------------------------------------------------------------------------------------------------------------------------------------------------------------------------------------------------------------------------------------------------------------------------------------------------------------------------------------------------------|
| <b>Barriers to lung cancer symptom presentation</b><br>Fixation on chest infections<br><br>Difference in perception around healthcare professional approach to patients' smoking | <p><i>"People tend to be fixated on a [chest] infection and they want their next rescue pack ready cos almost as if it's inevitable; it's going to happen in the next month or so." (Focus group 4)</i></p> <p><i>"I think there is a gulf between what people believe their GP would say to them if they do actually talk about [smoking] as opposed to what that conversation actually is in reality....But certainly as far as the formal training coming out of public health, if they are doing that then there is, that's not a lecture...But that's what people fear is going to be what they're going to be told" (Focus group 3)</i></p>                                                                                                                                                                                                                                                                                                                                                                                                                                                                                                                                                           |
| <b>Potential format of an intervention to support earlier lung cancer detection</b>                                                                                              | <p><i>Participant 2: "So what I'm saying is, you know them mobile buses... in the shopping area, where people go shops, or outside the hospital... So they set them up and people are walking past, and even though they can't be bothered to go to the doctors, and they look and they think I'll just pop in</i></p> <p><i>Participant 1: Cos you wouldn't hesitate you know, you'd just go in.</i></p> <p><i>Participant 2: You're just a person, they don't know and they're just seeing what's there, or what's there or what's the problem with you. If there's no problem</i></p> <p><i>Participant 3: People think you don't want to think you're, feel as if you're wasting the doctor's time" (Focus group 1)</i></p>                                                                                                                                                                                                                                                                                                                                                                                                                                                                             |
| <b>Intervention content</b><br>More specific symptom advice<br><br>Messages to combat negative beliefs<br><br>Smoking cessation                                                  | <p><i>Participant 1: "Yeah I think when you say 'cough' it's a bit broad and it's a bit...You know, you've had a cough for two weeks, off you go.</i></p> <p><i>Participant 3: It'd be useful if it was a change in your regular cough" (Focus group 4)</i></p> <p><i>"Positive messages, particularly around lung cancer because everybody, you know it's like a death knell isn't it? And actually it's not, it doesn't have to be. You know you're talking here about early diagnosis which is a big deal isn't it" (Focus group 3)</i></p> <p><i>"You've got to include [smoking cessation information]...I think it's how you deliver the message...not in such a way you feel ashamed for smoking. I've noticed [the nurse] has got a way of telling patients how to stop smoking, she does it in a, not in a 'well you should stop smoking', that kind of way. She'll say 'have you ever thought about giving it up. You know it would improve your chest a bit'. And I've seen [the nurse do it] more in a non-lecturey basis, more of a, 'have you ever thought about it?' Relaxed, warmer manner. So I'm not lecturing you, it's your choice. You know it's bad for you." (Focus group 4)</i></p> |

1  
2  
3  
4  
5  
6  
7  
8  
9  
10  
11  
12  
13  
14  
15  
16  
17  
18  
19  
20  
21  
22  
23  
24  
25  
26  
27  
28  
29  
30  
31  
32  
33  
34  
35  
36  
37  
38  
39  
40  
41  
42  
43  
44  
45  
46  
47  
48  
49  
50  
51  
52  
53  
54  
55  
56  
57  
58  
59  
60

For peer review only

**Supplementary File 1. Consolidated criteria for reporting qualitative studies (COREQ): 32-item checklist with page numbers to indicate section of the article [34]**

| Checklist item                                 | Questions to consider                                                                                                                                           | Page number in article |
|------------------------------------------------|-----------------------------------------------------------------------------------------------------------------------------------------------------------------|------------------------|
| <b>Domain 1: Research team and reflexivity</b> |                                                                                                                                                                 |                        |
| <b>Personal Characteristics</b>                |                                                                                                                                                                 |                        |
| 1. Interviewer/facilitator                     | Which author/s conducted the interview or focus group?                                                                                                          | 8                      |
| 2. Credentials                                 | What were the researcher's credentials? <i>E.g. PhD, MD</i>                                                                                                     | 8                      |
| 3. Occupation                                  | What was their occupation at the time of the study?                                                                                                             | 8                      |
| 4. Gender                                      | Was the researcher male or female?                                                                                                                              | 8                      |
| 5. Experience and training                     | What experience or training did the researcher have?                                                                                                            | 8                      |
| <b>Relationship with participants</b>          |                                                                                                                                                                 |                        |
| 6. Relationship established                    | Was a relationship established prior to study commencement?                                                                                                     | 6                      |
| 7. Participant knowledge of the interviewer    | What did the participants know about the researcher? <i>e.g. personal goals, reasons for doing the research</i>                                                 | 6                      |
| 8. Interviewer characteristics                 | What characteristics were reported about the interviewer/facilitator? <i>e.g. Bias, assumptions, reasons and interests in the research topic</i>                | 8                      |
| <b>Domain 2: study design</b>                  |                                                                                                                                                                 |                        |
| <b>Theoretical framework</b>                   |                                                                                                                                                                 |                        |
| 9. Methodological orientation and Theory       | What methodological orientation was stated to underpin the study? <i>e.g. grounded theory, discourse analysis, ethnography, phenomenology, content analysis</i> | 8                      |
| <b>Participant selection</b>                   |                                                                                                                                                                 |                        |
| 10. Sampling                                   | How were participants selected? <i>e.g. purposive, convenience, consecutive, snowball</i>                                                                       | 5-6                    |
| 11. Method of approach                         | How were participants approached? <i>e.g. face-to-face, telephone, mail, email</i>                                                                              | 6-7                    |
| 12. Sample size                                | How many participants were in the study?                                                                                                                        | 9, 13                  |
| 13. Non-participation                          | How many people refused to participate or dropped out? Reasons?                                                                                                 | 9                      |
| <b>Setting</b>                                 |                                                                                                                                                                 |                        |
| 14. Setting of data collection                 | Where was the data collected? <i>e.g. home, clinic, workplace</i>                                                                                               | 7                      |
| 15. Presence of non-participants               | Was anyone else present besides the participants and researchers?                                                                                               | 7                      |
| 16. Description of sample                      | What are the important characteristics of the sample? <i>e.g. demographic data, date</i>                                                                        | 9-10, 13-14            |
| <b>Data collection</b>                         |                                                                                                                                                                 |                        |
| 17. Interview guide                            | Were questions, prompts, guides provided by the authors? Was it pilot tested?                                                                                   | 6-7                    |

|                                        |                                                                                                                                          |                    |
|----------------------------------------|------------------------------------------------------------------------------------------------------------------------------------------|--------------------|
| 18. Repeat interviews                  | Were repeat interviews carried out? If yes, how many?                                                                                    | 6                  |
| 19. Audio/visual recording             | Did the research use audio or visual recording to collect the data?                                                                      | 6, 8               |
| 20. Field notes                        | Were field notes made during and/or after the interview or focus group?                                                                  | 8                  |
| 21. Duration                           | What was the duration of the interviews or focus group?                                                                                  | 7                  |
| 22. Data saturation                    | Was data saturation discussed?                                                                                                           | 7                  |
| 23. Transcripts returned               | Were transcripts returned to participants for comment and/or correction?                                                                 |                    |
| <b>Domain 3: analysis and findings</b> |                                                                                                                                          |                    |
| <b>Data analysis</b>                   |                                                                                                                                          |                    |
| 24. Number of data coders              | How many data coders coded the data?                                                                                                     | 8                  |
| 25. Description of the coding tree     | Did authors provide a description of the coding tree?                                                                                    | 8                  |
| 26. Derivation of themes               | Were themes identified in advance or derived from the data?                                                                              | 8                  |
| 27. Software                           | What software, if applicable, was used to manage the data?                                                                               | 8                  |
| 28. Participant checking               | Did participants provide feedback on the findings?                                                                                       | 8                  |
| <b>Reporting</b>                       |                                                                                                                                          |                    |
| 29. Quotations presented               | Were participant quotations presented to illustrate the themes / findings? Was each quotation identified? e.g. <i>participant number</i> | Figure 1, Figure 2 |
| 30. Data and findings consistent       | Was there consistency between the data presented and the findings?                                                                       | 9-15               |
| 31. Clarity of major themes            | Were major themes clearly presented in the findings?                                                                                     | 10-15              |
| 32. Clarity of minor themes            | Is there a description of diverse cases or discussion of minor themes?                                                                   | 10-15              |

**Supplementary file 1. Symptom sorting task****Symptoms included in the symptom sorting task**

Participants were asked '*We know that people decide go to the doctor at different times with symptoms. I'm going to show you some pieces of card with symptoms on. I'd like you to rank them from the ones that you would go to the doctor with first through to the last on this sheet of paper.*'

Coughing up blood

Persistent chest infection

Chest or shoulder pain

Ache or pain when coughing or breathing

Persistent breathlessness

A cough that doesn't go away

A long standing cough that gets worse

Persistent tiredness or lack of energy

Loss of appetite or unexplained weight loss

Changes in the appearance of fingers such as the ends becoming curved or larger

Hoarse voice



# BMJ Open

## Engaging high-risk groups in early lung cancer detection: a qualitative study of symptom presentation and intervention preferences amongst the UK's most deprived communities

|                                 |                                                                                                                                                                                                                                                                                                                                                                                                                                                                                                                                                                                                                                                                      |
|---------------------------------|----------------------------------------------------------------------------------------------------------------------------------------------------------------------------------------------------------------------------------------------------------------------------------------------------------------------------------------------------------------------------------------------------------------------------------------------------------------------------------------------------------------------------------------------------------------------------------------------------------------------------------------------------------------------|
| Journal:                        | <i>BMJ Open</i>                                                                                                                                                                                                                                                                                                                                                                                                                                                                                                                                                                                                                                                      |
| Manuscript ID                   | bmjopen-2018-025902.R1                                                                                                                                                                                                                                                                                                                                                                                                                                                                                                                                                                                                                                               |
| Article Type:                   | Research                                                                                                                                                                                                                                                                                                                                                                                                                                                                                                                                                                                                                                                             |
| Date Submitted by the Author:   | 06-Nov-2018                                                                                                                                                                                                                                                                                                                                                                                                                                                                                                                                                                                                                                                          |
| Complete List of Authors:       | McCutchan, GM; Cardiff University, Division of Population Medicine<br>Hiscock, Julia; Bangor University, North Wales Centre for Primary Care Research<br>Hood, Kerensa<br>Murchie, Peter; University of Aberdeen, Division of Applied Health Science<br>Neal, Richard; University of Leeds<br>Newton, Gareth; Cardiff University, Division of Population Medicine, Patient and Public Involvement<br>Thomas, Sara; Public Health Wales, Cwm Taf Public Health Team<br>Thomas, Ann Maria; Cardiff University, Division of Population Medicine, Patient and Public Involvement<br>Brain, Kate; Cardiff University, Division of Population Medicine, School of Medicine |
| <b>Primary Subject Heading</b>: | Oncology                                                                                                                                                                                                                                                                                                                                                                                                                                                                                                                                                                                                                                                             |
| Secondary Subject Heading:      | Respiratory medicine, Qualitative research, Public health, Health policy, Smoking and tobacco                                                                                                                                                                                                                                                                                                                                                                                                                                                                                                                                                                        |
| Keywords:                       | PRIMARY CARE, PUBLIC HEALTH, QUALITATIVE RESEARCH, RESPIRATORY MEDICINE (see Thoracic Medicine), lung cancer, socioeconomic status                                                                                                                                                                                                                                                                                                                                                                                                                                                                                                                                   |
|                                 |                                                                                                                                                                                                                                                                                                                                                                                                                                                                                                                                                                                                                                                                      |

SCHOLARONE™  
Manuscripts

1  
2  
3 1 **Title page**  
4  
5 2

6 3 **Title:** Engaging high-risk groups in early lung cancer detection: a qualitative study of symptom  
7  
8 4 presentation and intervention preferences amongst the UK's most deprived communities  
9  
10 5

11 6 **Authors:** Dr Grace M McCutchan<sup>1</sup>, Dr Julia Hiscock<sup>2</sup>, Prof KerENZA Hood<sup>3</sup>, Prof Peter Murchie<sup>4</sup>, Prof  
12  
13 7 Richard D Neal<sup>5</sup>, Mr Gareth Newton<sup>1</sup>, Mrs Sara Thomas<sup>6</sup>, Mrs Ann-Maria Thomas<sup>1</sup>, Prof Kate Brain<sup>1</sup>  
14  
15 8

16 9 **Affiliations:**

17  
18 10 <sup>1</sup>Division of Population Medicine, School of Medicine, Cardiff University, Cardiff, UK

19  
20 11 <sup>2</sup>North Wales Centre for Primary Care Research, Bangor University, Wrexham, UK

21  
22 12 <sup>3</sup>Centre for Trials Research, School of Medicine, Cardiff University, Cardiff, UK

23  
24 13 <sup>4</sup>Division of Applied Health Sciences, Section of Academic Primary Care, University of Aberdeen,  
25 14 Aberdeen, UK

26  
27 15 <sup>5</sup>Leeds Institute of Health Sciences, Faculty of Medicine and Health, University of Leeds, Leeds, UK

28  
29 16 <sup>6</sup>Cwm Taf Public Health Team, Public Health Wales, Keir Hardy University Health Park, Merthyr  
30 17 Tydfil, UK.  
31  
32 18

33 19 **Corresponding author:** Grace McCutchan. Postal address: Division of Population Medicine, Cardiff  
34 20 University, 1st Floor, Neuadd Meirionnydd, Heath Park, Cardiff, CF14 4YS. Email:  
35 21 mcutchanGM@cardiff.ac.uk. Telephone: +44 (0)2920 687639.  
36 22  
37 23  
38 24  
39 25  
40 26  
41 27  
42 28  
43 29  
44 30  
45 31  
46 32  
47 33  
48 34  
49 35  
50  
51  
52  
53  
54  
55  
56  
57  
58  
59  
60

40 24 **Word count: 5500**

## **Abstract**

### **Objectives**

People at high-risk for lung cancer - current/former smokers, aged 40+ years, with serious lung comorbidity (i.e. Chronic Obstructive Pulmonary Disease) and living in highly deprived areas - are more likely to delay symptom presentation. This qualitative study aimed to understand the influences on early presentation with lung cancer symptoms in high-risk individuals and intervention preferences.

### **Methods**

Semi-structured qualitative interviews with 37 high-risk individuals (without a cancer diagnosis), identified through seven GP practices in socioeconomically deprived areas of England, Scotland and Wales (most deprived 20%). A symptom attribution task was used to explore lung symptom perception and help-seeking, developed using Leventhal's Common Sense Model. Four focus groups with 18 high-risk individuals and 16 local stakeholders (healthcare professionals and community partners) were conducted to explore preferences for an intervention to promote early lung cancer symptom presentation. Data were synthesised using Framework analysis.

### **Results**

Individual and area level indicators of deprivation confirmed that interview participants were highly deprived. Preoccupation with managing 'treatable' short-term conditions (chest infections), led to denial and avoidance of 'inevitable and incurable' longer-term conditions (lung cancer). Feeling judged and unworthy of medical help because of their perceived social standing or lifestyle deterred medical help seeking, particularly when difficult life circumstances and traumatic events led to tobacco and alcohol addiction. Focus group participants recommended multi-faceted interventions in community venues, with information about lung cancer symptoms and the benefits of early diagnosis, led by a trained and non-judgemental facilitator.

### **Conclusions**

This study was novel in engaging a high-risk population to gain an in-depth understanding of the broader contextual influences on self-management of lung cancer symptoms. Perceived lack of health service entitlement and complex lives facilitated avoidance of recognising and presenting with lung cancer symptoms. Community-based interventions have the potential to empower disadvantaged populations to seek medical help for lung symptoms.

1  
2  
3 1 **Key words:** Lung cancer, deprived, qualitative, early diagnosis, medical help seeking, barriers.  
4  
5 2

6 3 **Strengths and limitations of the study**  
7

- 8 4 • This was the first study to use in-depth qualitative methods to explore how to engage high  
9 5 risk individuals from socioeconomically deprived areas in early lung cancer detection.  
10 6 • A major strength of this study was the proactive and rigorous sampling procedures used to  
11 7 ensure that our sample was at high risk for lung cancer.  
12 8 • Assessment of individual and area level indicators of deprivation confirmed that interview  
13 9 participants were highly deprived; all participants resided in the 20% most deprived areas of  
14 10 the three UK nations, and most participants were unemployed/seeking benefits and/or  
15 11 rented social housing.  
16 12 • To overcome the methodological limitations associated with studying anticipated or  
17 13 retrospectively recalled cancer symptom presentation, we recruited participants with no  
18 14 previous diagnosis of lung cancer and did not mention lung cancer in the interview study  
19 15 materials or during completion of the symptom attribution task.  
20 16 • Opportunistic recruitment of focus group participants who may have been more favourably  
21 17 disposed to an intervention was a potential study limitation.  
22 18  
23 19  
24 20  
25 21  
26 22  
27 23  
28 24  
29 25  
30 26  
31 27  
32 28  
33 29  
34 30  
35 31  
36 32  
37 33  
38 34  
39  
40  
41  
42  
43  
44  
45  
46  
47  
48  
49  
50  
51  
52  
53  
54  
55  
56  
57  
58  
59  
60

## 1 INTRODUCTION

2 Lung cancer is the leading cause of cancer mortality worldwide [1]. Outcomes are among the  
3 poorest for all cancers, with only 13% of lung cancer patients surviving five or more years in the UK  
4 [2]. Diagnosis of lung cancer at an early stage can enable curative surgical resection, meaning over  
5 80% of patients will survive one year or more when diagnosed at Stage I[3]. Delayed medical help  
6 seeking for symptoms and the high proportion of lung cancer diagnoses through emergency  
7 departments may partly explain why lung cancer is commonly diagnosed at an advanced, incurable  
8 stage[4]. Due to low specificity of lung cancer symptoms and similarity to other acute and comorbid  
9 respiratory conditions, patients face difficulty in knowing when to seek medical help[5,6].

10  
11 Multiple symptoms and risk factors for lung cancer including older age, smoking, the presence of a  
12 lung comorbidity and socioeconomic deprivation increase the likelihood that a patient presenting to  
13 their GP with symptoms indicative of lung cancer will receive a cancer diagnosis[7-9]. Lung cancer is  
14 more common and mortality higher in areas of high socioeconomic deprivation; it has been  
15 estimated that each year, socioeconomic inequalities account for 11,700 excess cases of lung cancer  
16 and 9,900 potentially avoidable lung cancer deaths in England[10]. High prevalence of smoking, lung  
17 comorbid conditions and asbestos exposure, all of which are well documented risk factors for lung  
18 cancer, contribute to high lung cancer incidence and mortality in deprived communities[11, 12].

19  
20 The presence of lung comorbidity such as chronic obstructive pulmonary disease (COPD) and history  
21 of smoking have been associated with a lower likelihood of presenting with lung cancer symptoms  
22 early[13,14]. In the lead up to lung cancer diagnosis, vague symptoms may go unnoticed or not  
23 considered a legitimate symptom to seek medical attention for, or be misattributed to smoking,  
24 aging or other comorbid conditions such as heart disease or COPD, thereby prolonging help  
25 seeking[5,13,15-26]. In addition, stigma attached to lung cancer[23,27-30] and fear of lung cancer  
26 diagnosis can deter medical help seeking for symptoms, particularly among smokers[23-25,29,31-  
27 33], leading to advanced stage disease at diagnosis[19]. To date, research has mainly been  
28 conducted with lung cancer patients from a range of socioeconomic groups with varying levels of  
29 lung cancer risk, retrospectively exploring the barriers to symptom presentation. Evidence is lacking  
30 about how individuals who are at high risk, and without a diagnosis of lung cancer, attribute  
31 potential lung cancer symptoms and decide to seek medical help.

32  
33 Strategies to prompt earlier help seeking for lung cancer symptoms are required. However, evidence  
34 is limited regarding optimal methods for promoting earlier detection through interventions targeted

1  
2  
3 1 at high risk, highly deprived groups. Mass media[34] and community based social marketing[35] lung  
4 cancer campaigns report limited reach to the most deprived groups. A nurse-led primary care  
5 2 intervention for older adults with a long smoking history or recent cessation reported increased and  
6 3 sustained intentions to seek help with lung cancer symptoms[36]. However, the intervention was  
7 4 not targeted at highly deprived groups. Novel methods to support the high risk groups to engage in  
8 5 early lung cancer detection are required.  
9 6  
10 7

11 8 The current study used a combination of interviews and focus groups to explore potential barriers to  
12 9 early lung cancer detection and strategies to encourage early help seeking with individuals who are  
13 10 the high risk for lung cancer. Qualitative interviews were used to gain an in-depth understanding of  
14 11 the processes and motivations involved in symptom attribution and medical help seeking for  
15 12 potential lung cancer symptoms in high risk, highly deprived individuals. We targeted  
16 13 socioeconomically deprived areas across three nations of the UK to approach potential participants,  
17 14 and used rigorous sampling procedures to ensure that our sample were at the high risk for lung  
18 15 cancer. To overcome methodological limitations associated with retrospective recall, we recruited  
19 16 participants with no previous diagnosis of lung cancer, and framed the interview around lung health,  
20 17 rather than lung cancer. Findings from the interviews were presented to focus groups participants in  
21 18 order to facilitate discussion about preferences and acceptability of interventions to engage high  
22 19 risk, highly deprived groups in early lung cancer detection. The focus groups were conducted in  
23 20 highly deprived areas with stakeholders who lived or worked in these communities. To our  
24 21 knowledge, this was the first study to explore the influences on early lung cancer detection and  
25 22 intervention preferences targeted at high risk groups living in the most deprived areas of the UK.  
26 23

## 24 **METHODS**

25 The Consolidated Criteria for Reporting Qualitative Research (COREQ)[37] criteria were used to  
26 27 guide reporting (Supplementary File 1).  
28

### 28 **Participant recruitment and sampling**

29 **Interviews.** Thirty-seven interview participants were recruited through seven primary care general  
30 31 medical practices (GP) in South Wales (Cwm Taf: three practices), England (Liverpool: one practice)  
32 33 and Scotland (Aberdeen: three practices). Using routinely published index of multiple deprivation  
34 35 (IMD) data for England, Scotland and Wales, GP practices with the highest proportion of their  
36 37 patients that reside in the most deprived quintile were contacted. Practice managers were asked to  
38 39 screen GP practice databases purposively for eligible study participants: men and women over the  
40 41  
42 43  
44 45  
46 47  
48 49  
50 51  
52 53  
54 55  
56 57  
58 59  
60

1  
2  
3 1 age of 40, who were current or former smokers, with a lung condition (COPD including chronic  
4 2 bronchitis and emphysema, interstitial lung disease or occupational lung disease). Participants were  
5 3 initially recruited from GP practices in Cwm Taf, where practice managers were asked to screen  
6 4 databases for current and former smokers, with no parameter set for number of years since quit  
7 5 attempt. Due to an initially high response rate from former smokers in Cwm Taf, subsequent  
8 6 participants in Aberdeen and Liverpool were sampled purposively according to smoking history. One  
9 7 GP practice in Aberdeen was asked to recruit current smokers and recent quitters (within ten years).  
10 8 Two GP practices in Aberdeen and one GP practice in Liverpool recruited current smokers only.  
11 9

12 10 To ensure that participants from highly deprived areas were invited to take part in the study,  
13 11 individual postcodes were screened by the research team. Eligible patients from the initial database  
14 12 screen were assigned a pseudo-anonymised participant identifier (PID). PID and postcode were  
15 13 checked against IMD score, and those that resided in the most deprived IMD quintile were eligible  
16 14 for the study. The final list of potentially eligible participants was checked by the GP for ability to  
17 15 provide informed consent, considered by the GP to be a risk to the interviewer or themselves and  
18 16 general health status (i.e. very seriously ill). Participants were excluded if they were diagnosed with  
19 17 lung cancer, were terminally ill or did not have capacity to consent.  
20 18

21 19 **Focus groups.** Eighteen participants for the focus groups with members of the public were recruited  
22 20 opportunistically through primary care or local community groups. Participant recruitment through  
23 21 primary care employed the same methods as those used to invite the interview participants.  
24 22 Pseudonymised participant identifiers were checked to ensure that those who took part in the focus  
25 23 groups had not already participated in the interviews. Additional participants were recruited  
26 24 opportunistically through local community respiratory support groups and non-health related groups  
27 25 in the local community centre. Local community group organisers in areas of high deprivation were  
28 26 contacted and asked for help to recruit members of the public in our target group. Local health  
29 27 service planning groups and health board staff facilitated recruitment of 12 participants for the  
30 28 healthcare professional and community partner (HPCP) focus groups.  
31 29

### 32 30 **Study procedures**

33 31  
34 32 Written consent and permission to audio-record were obtained on the day of the interviews and  
35 33 focus groups.  
36 34  
37 35  
38 36  
39 37  
40 38  
41 39  
42 40  
43 41  
44 42  
45 43  
46 44  
47 45  
48 46  
49 47  
50 48  
51 49  
52 50  
53 51  
54 52  
55 53  
56 54  
57 55  
58 56  
59 57  
60 58

1  
2  
3 1 **Interviews.** Eligible participants were invited by letter with more detailed study information  
4 attached, with a reminder at two weeks to non-respondents. Those who returned the study reply  
5 slip via a FREEPOST envelope were contacted by the interviewer (GM or JH) to arrange a suitable  
6 time and date for the interview, to outline the study and answer any questions.  
7  
8  
9

10 5  
11 6 Interviews were conducted using a semi-structured topic guide to facilitate a discussion about illness  
12 perceptions and coping strategies; development was guided by the Common Sense Model[38]  
13 (Supplementary File 2). The interview aimed to explore experiences of their lung condition, symptom  
14 attribution, symptom experience and help seeking behaviour, the influence of smoking history on  
15 new or changing symptoms, and if appropriate, lung cancer awareness and beliefs.  
16  
17  
18  
19

20 11  
21 12 A symptom sorting task was used to provide participants with a concrete visual task to increase  
22 engagement with the interview in the context of potential low literacy. The task formed a basis for  
23 discussion about symptom attribution and experience, where participants were asked to order 11  
24 symptoms from those they would go to the doctor with first, through to the last. The 11 symptoms  
25 were selected from the NICE guidance for referral of suspected lung cancer  
26 (<https://www.nice.org.uk/guidance/cg121>). The symptoms were re-worded to simplify the language  
27 in line with wording found on the NHS Choices website for lung cancer symptoms and any reference  
28 to time scale of symptoms was removed (Supplementary File 2, p.9). For example, a cough that lasts  
29 for 3 weeks or more was amended to 'persistent cough', and haemoptysis was amended to  
30 'coughing up blood'. The presentation order of the symptoms was rotated between interviews.  
31  
32  
33  
34  
35  
36  
37  
38  
39

40 23 To explore potential lung cancer symptom attribution outside of a cancer context, there was no  
41 mention of cancer in the interview study information packs or when participants completed the  
42 symptom sorting task. If appropriate, participants were asked questions to explore lung cancer  
43 awareness and beliefs at the end of the interview or when participants discussed lung cancer  
44 unprompted.  
45  
46  
47  
48  
49

50 29 Demographic data were collected using a short questionnaire, including three additional measures  
51 of socioeconomic group: age, gender, smoking status (quantity and duration), home ownership,  
52 occupation and educational attainment. Interviews were conducted until data saturation (no new  
53 themes emerging[39]).  
54  
55  
56  
57  
58  
59  
60



1 **Focus groups.** High risk members of the public, and healthcare professionals (i.e. GP, nurse,  
2 community pharmacist/community partners working in areas of deprivation with people with  
3 smoking history and/or lung conditions were sent information about the study and invited to take  
4 part in the focus group. Focus group participants were explicitly informed that the study was about  
5 the development of an intervention about lung cancer. A mutually convenient time, date and  
6 location for the focus groups was agreed. The focus groups were conducted using a semi-structured  
7 topic guide to explore preferences for an intervention to promote earlier lung cancer diagnosis.  
8 Separate topic guides were used for the public and professional groups (Supplementary file 3 and 4).  
9 Participants were given a verbal summary of the key findings from the qualitative interviews, and  
10 asked to discuss preferences for a potential lung cancer intervention targeted at high risk, highly  
11 deprived individuals. Topics for discussion were: preferred format of an intervention,  
12 recommendations for intervention content, preferred location and facilitator for intervention  
13 delivery, and recommendations for the inclusion of smoking cessation advice.

#### 15 **Setting**

16 Most interviews (n=34) took place face-to-face in participant's own homes, with three taking place in  
17 a café, local community centre or over the telephone, and lasted between 46 and 146 minutes  
18 (mean 83 minutes). Family members were present for three interviews but did not participate in the  
19 study. Focus groups took place in primary care settings (n=2) or local community centres (n=2).  
20 Members of the public who took part in the interviews or focus groups were given a £10 shopping.  
21 Healthcare professionals and community partners were not reimbursed for their time.

22  
23 Interviews and focus groups in England were conducted by JH (PhD), a trained and experienced  
24 female qualitative Research Fellow and Medical Sociologist. The Welsh and Scottish interviews and  
25 focus groups were conducted by GM (PhD), a female Health Psychologist and trained qualitative  
26 Research Associate.

#### 28 **Data analysis**

29 Interviews and focus groups were audio-recorded and transcribed verbatim. Anonymised transcripts  
30 were analysed in detail using the Framework method[40]. Framework analysis is a well-respected  
31 and commonly used approach to qualitative data analysis. It was considered particularly suitable for  
32 this study due to its transparency and the team work involved[41]. Framework enabled the sharing  
33 of synthesised data charts among team members to facilitate participation in analysis and  
34 interpretation workshops.

1  
2  
3 1 The data were analysed in five stages: familiarisation, identification of a thematic framework,  
4 2 indexing, charting, and interpretation. A separate index was created on Microsoft Excel for the  
5 3 interview and focus group data; however, wherever possible, overlap was coded using the same  
6 4 indexing terms, for example 'barriers to symptom presentation' was commonly discussed in both the  
7 5 interview and focus groups. The index was developed by two researchers (GM and JH). Themes were  
8 6 generated independently and consolidated through discussion in nine interpretation workshops over  
9 7 a nine month period by GM and JH. The different perspectives of the researchers as noted above  
10 8 was a benefit during analysis and interpretation. Field notes were recorded for each interview and  
11 9 focus group, and incorporated into discussion during the analysis workshops. Although not formally  
12 10 incorporated into the analysis plan, the positioning of each symptom in the attribution task was  
13 11 considered during interpretive workshops. Interpretive themes were generated by JH and GM, and  
14 12 developed with all authors in monthly management meetings. Transcripts and study findings were  
15 13 not checked by participants; however, all participants were mailed a summary of the study findings.

#### 15 **Ethical approval**

16 The study received ethical approval from Southampton Central- Hampshire A Research Ethics  
17 Committee (16/SC/0589).

19 **Patient and public involvement.** Patient and public representatives (AMT and GN) were involved in  
20 the design of the study and interpretation of study findings in monthly management group  
21 meetings. All study materials and topic guides were developed with lay input (AMT and GN) and  
22 written to a reading age of 10 years due to potentially low literacy. Reading age was calculated using  
23 the Automated Readability Index ([www.readabilityformulas.com](http://www.readabilityformulas.com)).

## 25 **RESULTS**

### 27 **Interviews**

29 Of the 397 invited to take part in the study, 78 people returned the study reply slip and declined to  
30 participate in the study; reasons for refusal were unknown. Thirty-seven participants agreed to take  
31 part in the study. The majority of the sample were female, current smokers, and with a mean age of  
32 65 years (Table 1). Most had a diagnosis of COPD. All 37 participants resided in the lowest quintile of  
33 deprivation for their respective country, of whom 15 were in the most deprived decile. Most

1 participants had left school before age 15 with no formal qualifications, lived in social housing, and  
 2 claimed disability benefit or job seekers allowance.

3 **Table 1. Qualitative interview sample characteristics**

| Sample characteristics                               | Total n=37   |
|------------------------------------------------------|--------------|
| <b>Gender</b>                                        |              |
| Male                                                 | 16           |
| Female                                               | 21           |
| <b>Age, years</b>                                    |              |
| Mean (range)                                         | 64.7 (48-84) |
| <b>Smoking status</b>                                |              |
| Current smoker                                       | 18           |
| Occasional smoker                                    | 3            |
| Former smoker, recent quitter (within five years)    | 5            |
| Former smoker (quit over five years ago)             | 11           |
| <b>Deprivation decile</b>                            |              |
| <b>Welsh Index of Multiple Deprivation (WIMD)</b>    |              |
| Decile 1 (most deprived 10%)                         | 5            |
| Decile 2 (most deprived 11-20%)                      | 10           |
| <b>Scottish Index of Multiple Deprivation (SIMD)</b> |              |
| Decile 1 (most deprived 10%)                         | 4            |
| Decile 2 (most deprived 11-20%)                      | 12           |
| <b>English Index of Multiple Deprivation (IMD)</b>   |              |
| Decile 1 (most deprived 10%)                         | 6            |
| <b>Self-reported lung condition</b>                  |              |
| COPD                                                 | 26           |
| Chronic bronchitis                                   | 2            |
| Chronic emphysema                                    | 2            |
| Occupational lung disease                            | 1            |
| Unsure of diagnosis                                  | 4            |
| Missing                                              | 2            |
| <b>Educational attainment</b>                        |              |
| Left school at/before age 15                         | 29           |
| Completed CSEs, O-Levels or equivalent               | 5            |
| Completed A levels or equivalent                     | 1            |
| Completed further education but not degree           | 1            |
| Missing                                              | 1            |
| <b>Employment</b>                                    |              |
| Employed full-time                                   | 2            |
| Employed part-time                                   | 1            |
| Casual work                                          | 1            |
| Job seekers or disability benefit                    | 17           |
| Retired                                              | 16           |
| <b>Home/living arrangement</b>                       |              |
| Own flat/house                                       | 14           |
| Rent from local authority/housing association        | 21           |
| Rent privately                                       | 1            |
| Missing                                              | 1            |

4

1  
2  
3 1 Key themes were: strategies involved in symptom detection and help seeking behaviour, maintaining  
4  
5 2 short term health, denial and avoidance of longer term health, the desire to be a model patient, and  
6  
7 3 the importance of the relationship with their healthcare professional. See Table 2 for illustrative  
8  
9 4 quotes.

### 10 5 11 6 ***Symptom detection strategies and help seeking*** 12 7

13  
14  
15 8 Symptoms discussed during the task were viewed as “part and parcel” (male, 68, England, current  
16  
17 9 smoker) of their lung condition, other pre-existing comorbidities or smoking habit, and were  
18  
19 10 consequently normalised and perceived not to require medical help. Changes to vague or  
20  
21 11 respiratory-type lung cancer symptoms were only taken seriously when remarked on by friends and  
22  
23 12 family or when they impacted on daily life.

24  
25 14 Symptoms that could indicate a chest infection were reportedly constantly monitored. Participants  
26  
27 15 discussed using sophisticated strategies such as noticing changes in the colour and consistency of  
28  
29 16 their phlegm or subtle audible changes in their cough to actively detect chest infections. Such  
30  
31 17 strategies were considered important to facilitate early detection and treatment for chest infections  
32  
33 18 through their primary care provider or with rescue packs (emergency packs of steroids and  
34  
35 19 antibiotics that can be kept at home), due to lung condition.

36  
37 21 Constant monitoring of phlegm for control of lung condition meant that participants could and  
38  
39 22 would notice haemoptysis, but few reported actively looking for haemoptysis on a regular basis.  
40  
41 23 Disparity between actual and anticipated medical help seeking was reported for haemoptysis. Most  
42  
43 24 participants had not previously experienced haemoptysis, but would anticipate seeking medical help  
44  
45 25 immediately due to the potentially serious nature of blood. However, some participants who had  
46  
47 26 previously or were currently experiencing haemoptysis attributed the presence of blood to non-  
48  
49 27 cancer causes such as their stomach ulcer or a previous flu jab. One participant ascribed their cough  
50  
51 28 to lung cancer. Some of the participants with experience of haemoptysis did not seek medical help.

### 52 30 ***Focus on maintaining short term health*** 53 31

54  
55 32 Participants reported seeking medical help quickly when symptoms were easy to detect, were  
56  
57 33 attributed to what was perceived as a treatable cause and represented an immediate health threat  
58  
59 34 i.e. a chest infection due to lung condition. Participants could often request an appointment the  
60

1 same day as permitted by their GP surgery policies. Prompt help seeking was reportedly due to fear  
2 of not being able to breathe and the potentially life-threatening nature of chest infections, and is  
3 likely to reflect the need to maintain good health in the short term.

4  
5 The focus on maintaining short term health may reflect low general expectations of health, where  
6 some participants disclosed surprise at living beyond 60 years of age. In addition, due to fear of  
7 potentially hearing bad news, some participants expressed a preference to not ask questions during  
8 a consultation or yearly review with the nurse. Participants discussed prioritising day-by-day living  
9 over longer term planning, thereby focusing on health in the short term.

### 10 11 ***Denial or avoidance of long term health outcomes***

12  
13 Most participants discussed scepticism about the link between lung cancer and smoking. Conversely,  
14 participants thought that lung cancer was inevitable due to their current or former lifestyle,  
15 including smoking history, working conditions, their lung condition and the reported incidence of  
16 lung cancer in their community. For many participants, the topic of lung cancer arose spontaneously.  
17 Lung cancer was discussed in the context of perceived inevitability when reflecting on their general  
18 lung health and during completion of the symptom task when recalling friends/family with lung  
19 cancer. Beliefs about inevitability were often coupled with highly negative fearful and fatalistic  
20 beliefs about lung cancer, with no cure and eventual death. Such claims were evidenced by knowing  
21 a high proportion of friends and family who were diagnosed with lung cancer and often died. A few  
22 participants discussed that a cure for lung cancer involved luck or was 'some miracle' (male, 56,  
23 Wales, occasional smoker), reflecting a perceived lack of control over early detection and treatment.  
24 Consequently, actual or anticipated medical help seeking for lung cancer symptoms was motivated  
25 by pain, or to seek a diagnosis and prognosis to notify family members. However, some participants  
26 anticipated refusal of treatment or would even contemplate suicide.

27  
28 We found differences in how participants with and without dependent family reported responding  
29 to symptoms of lung cancer. Female participants with dependent children or grandchildren  
30 discussed a motivation to visit the doctor with symptoms suggestive of lung cancer, in order to  
31 receive a prognosis to enable childcare arrangements after death. Women with dependent children  
32 who held more positive beliefs about lung cancer treatment reported the need to seek help for  
33 treatment to 'stay healthy' and prolong life. Participants with no dependent family were more likely  
34 to ignore lung cancer symptoms, or anticipate seeking medical help if in pain but refuse treatment.

### ***The model patient***

Participants discussed a sense of lack of entitlement to health services due to smoking habit, where respiratory-type symptoms of lung cancer were perceived as self-inflicted. For some, this was reinforced by an actual or expected 'smoking lecture' each time they sought help from healthcare professionals; the lecture made participants feel ostracised, particularly when smoking was used as a coping mechanism and contributed to not feeling worthy of seeking medical help. Some participants perceived that they may be treated differently by health professionals because they live in an area of deprivation, and discussed a potential power imbalance during consultations.

Conversely, participants reported high criticism towards people who were perceived to waste, exploit and overuse NHS resources. They cited drug addicts, illegitimate benefits claimers, older people wanting social interaction, and people with coughs and colds as over users of the health service. Such beliefs may reflect a downward comparison to other more stigmatised service users to legitimise their own help seeking. In order to be considered a model and non-problem patient, participants discussed legitimising their own help seeking by only consulting when absolutely necessary - and often after trying their 'own cures' i.e. cough medicine from the pharmacist - to not burden the doctors. Infrequent attenders or 'good service users' discussed feeling a sense of superiority for being a model patient.

### ***Relationship with the healthcare professional***

Some participants disclosed traumatic events in their lives including physical and sexual abuse, leading to tobacco dependence and alcohol addiction. In addition, more than half of the sample described symptoms of depression and anxiety. Therefore, the reported relationship with their healthcare professional was important when considering whether to present with lung symptoms. Participants discussed the need to feel understood and not judged by their healthcare professional, with their personal history taken into account in the context of health behaviour such as smoking.

Those who discussed feeling comfortable, safe and not judged by their chosen healthcare professional felt encouraged to present with symptoms. Some participants reported that they were prepared to wait up to three weeks for an appointment with their preferred healthcare professional to discuss worrisome and potentially serious symptoms that could indicate lung cancer. Many

1 participants reported problems with maintaining continuity of care, highlighting problems with the  
 2 stretched National Health Service.

3  
 4 **Table 2. Illustrative quotes (qualitative interviews)**

| Theme                                                                                                                                                                                                            | Quote                                                                                                                                                                                                                                                                                                                                                                                                                                                                                                                                                                                                                                                                                                                                                                                                                                                                                                                                                                                                                                                                                                                                                                                                                             |
|------------------------------------------------------------------------------------------------------------------------------------------------------------------------------------------------------------------|-----------------------------------------------------------------------------------------------------------------------------------------------------------------------------------------------------------------------------------------------------------------------------------------------------------------------------------------------------------------------------------------------------------------------------------------------------------------------------------------------------------------------------------------------------------------------------------------------------------------------------------------------------------------------------------------------------------------------------------------------------------------------------------------------------------------------------------------------------------------------------------------------------------------------------------------------------------------------------------------------------------------------------------------------------------------------------------------------------------------------------------------------------------------------------------------------------------------------------------|
| <b>Symptom detection strategies and help seeking</b><br>Friends and family notice symptoms<br><br>Sophisticated symptom detection strategies/ monitoring of chest infections<br><br>Normalisation of haemoptysis | <p><i>"My daughter might [notice changes to symptoms] cos she mentions it now and then...she'll give me a dig and she'll say 'your breathing's annoying me'. Cos it's heavy breathing so. Then again there's something wrong"</i> (Male, 48, Scotland, former smoker)</p> <p><i>"If [phlegm is] white and bubbly it's not a chest infection. It's only when it goes green so you can tell yourself exactly how close you are to getting an infection... There's just two different kinds of green spittle, if it's fluorescent green then you've got an infection, normal antibiotics won't work with me, if it's the lighter green I'm fine with that one... it's handy to look out for, because you can get the right medication at the right time...because if anything happens to me, there's no one for my kids."</i> (Female, 48, Scotland, current smoker)</p> <p><i>"Coughing up blood, I do actually get some of that I don't know why, but it could be because of the ulcer thing and that...There again then well I do get like nosebleeds, and then I'm thinking the blood maybe coming inside and coming down, you swallow it see. So then that will come back up won't it"</i> (Male, 62, Wales, former smoker)</p> |
| <b>Focus on maintaining health in the short term</b><br><br>Fear of bad news during a consultation                                                                                                               | <p><i>"I get worried about having chest infection, I get more worried about today or tomorrow rather than the future. The future that's going ahead for us anyway. Lung cancer's not an issue really"</i> (male, 50, Scotland, former smoker)</p> <p><i>"I'm very poor in asking questions cos I don't want to know the results. Simple as that...no I don't ask when they say the oxygen [saturation] is alright I just think well it's alright and it's one thing less I haven't got to worry about"</i> (Female, 69, Wales, former smoker)</p>                                                                                                                                                                                                                                                                                                                                                                                                                                                                                                                                                                                                                                                                                 |
| <b>Denial and avoidance of long term health outcomes</b><br>Scepticism about the link between smoking and lung cancer<br><br>Perceived inevitability of lung cancer/ anticipate suicide                          | <p><i>"You hear occasions where people who don't smoke, who've never smoked. Well how do they get their lung cancer?...I've got [lung cancer] in my head, I'm probably going to get it, if I haven't already got it because of the lifestyle I've had. Where I've worked and everything else, what I've worked with."</i> (Male, 68, England, current smoker)</p> <p><i>"[Lung cancer] is really, really on the forefront on the mind...I just think 'oh god, please don't let me get cancer'...I think if I was to get cancer, I've sometimes said to myself, I'd commit suicide. I</i></p>                                                                                                                                                                                                                                                                                                                                                                                                                                                                                                                                                                                                                                      |

|                                                                                                                                                                                                         |                                                                                                                                                                                                                                                                                                                                                                                                                                                                                                                                                                                                                                                                                                                                                                                                                                                                                                                                                                                                                                                                                                                                                                                                                                                                                                                                                                                                                                                                                                                                                                                                                                                                                                                                                                                                                                                                                                                                |
|---------------------------------------------------------------------------------------------------------------------------------------------------------------------------------------------------------|--------------------------------------------------------------------------------------------------------------------------------------------------------------------------------------------------------------------------------------------------------------------------------------------------------------------------------------------------------------------------------------------------------------------------------------------------------------------------------------------------------------------------------------------------------------------------------------------------------------------------------------------------------------------------------------------------------------------------------------------------------------------------------------------------------------------------------------------------------------------------------------------------------------------------------------------------------------------------------------------------------------------------------------------------------------------------------------------------------------------------------------------------------------------------------------------------------------------------------------------------------------------------------------------------------------------------------------------------------------------------------------------------------------------------------------------------------------------------------------------------------------------------------------------------------------------------------------------------------------------------------------------------------------------------------------------------------------------------------------------------------------------------------------------------------------------------------------------------------------------------------------------------------------------------------|
| <p>Avoidance of lung cancer due to social and contextual factors</p> <p>Lung cancer fatalism/ anticipated refusal of treatment</p> <p>Response to lung cancer symptom/ female with dependent family</p> | <p>would take a pill or something.” (Female, 81, Scotland, current smoker)</p> <p>“[Lung cancer] worries me but I’ve got proper problems to worry about [carer for disabled son, problems with social services and benefits claims, insecurity of current council owned housing and problems with area of residence with ‘junkies’]. I won’t worry about it until it’s actually here. If I started worrying about eventualities I’d never get anywhere” (Female, 48, Scotland, current smoker)</p> <p>“Until anything happened and I’m actually told that I’ve got [lung cancer], there’s nothing I can do about it. I’m really a believer of what’s in your cards is already written. So I don’t look at anything like that...But if they told me it was cancer, I would go ok then, but I wouldn’t take any of the treatments... if it’s my time, it’s my time. It just doesn’t, I don’t think I’ve got any more fight in me for all that. I think that would be the last straw for me. So I just live every day as it comes now, I don’t really plan much. So I’m just living in the day, you know. Cos whatever happens, happens anyway.” (Female, 49, Scotland, current smoker)</p> <p>“I don’t think they can treat [lung cancer]. You’ve just got to accept it haven’t you...I would go to the doctor [with a symptom], I think I would like to know how long I had. Not for me but for [my son] you know. For him...If it was just me I wouldn’t want to know, but because I’ve got him, [I would] definitely...When I seen the blood I did think to myself, I flushed it away right away...I seen the blood and I thought no, and I thought I’ve got to, you know, because of [my son]. The only way I would want to know is because of him. If I was by myself I would just say, don’t want to know...Can’t just think about myself I’ve got to think about him as well.” (Female, 68, Scotland, current smoker)</p> |
| <p><b>The model patient</b></p> <p>Perception of healthcare professionals attitude to smokers</p> <p>Critical of people who waste NHS resources</p>                                                     | <p>“You feel as though you’re an alien because you smoke, you feel as so they just look at you and say ‘urghh’, you know” (Female, 52, Scotland, current smoker)</p> <p>“I can guarantee if I went this Monday and go next Monday the same people are sitting there. I’m being honest, they’re a drain on society on the NHS, but that’s the way they live...these people that go there are not really ill, I think they’re just seeking attention” (Male, 78, England, current smoker).</p>                                                                                                                                                                                                                                                                                                                                                                                                                                                                                                                                                                                                                                                                                                                                                                                                                                                                                                                                                                                                                                                                                                                                                                                                                                                                                                                                                                                                                                   |
| <p><b>Relationship with healthcare professional</b></p> <p>Disclosure of highly sensitive personal problem</p>                                                                                          | <p>“Some people are friendly and not stony faced...if [the HCP] can’t even start a conversation with the simplest of ice breakers then how can people tell about pooping themselves when they’re coughing up” (Female, 48, Scotland, current smoker)</p>                                                                                                                                                                                                                                                                                                                                                                                                                                                                                                                                                                                                                                                                                                                                                                                                                                                                                                                                                                                                                                                                                                                                                                                                                                                                                                                                                                                                                                                                                                                                                                                                                                                                       |



|                           |                                                                                                                                   |
|---------------------------|-----------------------------------------------------------------------------------------------------------------------------------|
| Good relationship with GP | <i>"I'm alright with [one GP], you could tell her anything, I've shocked her sometimes"</i> (Female, 51, England, current smoker) |
|---------------------------|-----------------------------------------------------------------------------------------------------------------------------------|

**Focus groups**

Two public focus groups were conducted in Wales and England. Most participants were female and former smokers, and all participants were diagnosed with a lung condition. Two professional focus groups were conducted in Wales. Most participants were female, and were medical professionals (Table 3).

**Table 3. Focus group characteristics**

| Members of the public                               | N participants   | Healthcare professionals and community partners  | N participants   |
|-----------------------------------------------------|------------------|--------------------------------------------------|------------------|
| <b>Group 1, England</b>                             | <b>total n=7</b> | <b>Group 3, Wales</b>                            | <b>total n=5</b> |
| <i>Gender</i>                                       |                  | <i>Gender</i>                                    |                  |
| Female                                              | 6                | Female                                           | 2                |
| Male                                                | 1                | Male                                             | 3                |
| <i>Smoking status</i>                               |                  | <i>Occupation</i>                                |                  |
| Current smoker                                      | 3                | Community nurse                                  | 1                |
| Former smoker                                       | 3                | Support group facilitator                        | 1                |
| Never smoker                                        | 1                | Community partner                                | 1                |
| <i>Self-reported lung condition</i>                 |                  | Third sector representative                      | 1                |
| COPD                                                | 7                | Public health representative                     | 1                |
| Recruited through Primary Care and community groups |                  | Recruited through the Health Board               |                  |
| <b>Group 2, Wales</b>                               | <b>total n=9</b> | <b>Group 4, Wales</b>                            | <b>total n=7</b> |
| <i>Gender</i>                                       |                  | <i>Gender</i>                                    |                  |
| Female                                              | 5                | Female                                           | 6                |
| Male                                                | 4                | Male                                             | 1                |
| <i>Smoking status</i>                               |                  | <i>Occupation</i>                                |                  |
| Current smoker                                      | 3                | Practice manager                                 | 1                |
| Former smoker                                       | 4                | Pharmacist                                       | 1                |
| Never smoker                                        | 2                | GP                                               | 2                |
| <i>Self-reported lung condition</i>                 |                  | Practice nurse                                   | 2                |
| COPD                                                | 9                | Medical student                                  | 1                |
| Recruited through community groups                  |                  | Recruited through the Health Board/ Primary Care |                  |

Key themes discussed were: barriers to early lung cancer detection, and preferences regarding the format and content of an intervention for the early detection of lung cancer. See Table 4 for illustrative quotes.

## 1 **Barriers to lung cancer symptom presentation**

2  
3  
4  
5  
6  
7  
8  
9  
10  
11  
12  
13  
14  
15  
16  
17  
18  
19  
20  
21  
22  
23  
24  
25  
26  
27  
28  
29  
30  
31  
32  
33  
34  
35  
36  
37  
38  
39  
40  
41  
42  
43  
44  
45  
46  
47  
48  
49  
50  
51  
52  
53  
54  
55  
56  
57  
58  
59  
60

1  
2  
3 The public and stakeholder focus groups confirmed our interview findings, where fear of wasting the  
4 doctor's time with trivial symptoms and fear of being judged or lectured about smoking was  
5 perceived to deter medical help seeking for potential lung cancer symptoms. In addition, the health  
6 professional group supported our findings that patients with lung conditions tend to be preoccupied  
7 by chest infections. However, we found potential disparity between the patient-reported experience  
8 of the GP's approach to smoking and the healthcare professional reported approach to smoking  
9 cessation. Healthcare professionals in Wales discussed new guidance that discourages health  
10 professionals from 'lecturing' patients, suggesting the patient reported experience may be based on  
11 previous healthcare interactions, and they consequently anticipate a lecture. Alternatively,  
12 healthcare professionals may be unaware of new guidance, or not adhere to new guidance and  
13 consequently continue to 'lecture' patients about smoking.  
14

## 15 **Potential format of an intervention to support earlier lung cancer detection**

16  
17 All groups discussed a preference for community based interventions, away from a traditional  
18 healthcare setting, for example a community event, talk in a community venue or health check bus,  
19 similar to breast screening mobile units. The anonymous and relaxed nature of such an intervention  
20 meant that intervention participants would feel they were not wasting GP time; rather it would act  
21 as a signal that their attendance at the event was desired. Participants compared this to a visit to the  
22 doctor, where they discussed a feeling of wasting the GP's time because they were not invited to  
23 attend. It was considered important that the intervention facilitator was knowledgeable or trained,  
24 non-judgemental, easy to talk to and approachable, highlighting the importance of relational aspects  
25 of a lung cancer intervention. Participants suggested a nurse, pharmacist, trained patient  
26 representative or community worker.  
27

## 28 **Intervention content**

29  
30 The public groups requested more information about the symptoms of lung cancer. However, the  
31 healthcare professional groups felt that current lung cancer symptom information was too broad,  
32 leading to dismissal and potential denial of lung cancer information because people with smoking  
33 history or comorbid lung conditions experience most of the symptoms daily. To overcome this  
34 problem, the healthcare professionals groups discussed the need for more specific symptom

1 information, emphasising changes to normal symptoms and coupled with information about risk  
2 factors for lung cancer.

3  
4 To modify negative beliefs about lung cancer, the health professionals groups suggested using  
5 positive stories to communicate messages about the importance of lung cancer early diagnosis and  
6 highlight the potential for survival outcomes with early stage detection.

7  
8 The inclusion of smoking cessation information in a lung cancer intervention was considered  
9 important by all groups. However, the manner in which smoking cessation could be approached was  
10 discussed as key to effective promotion of smoking cessation. Participants suggested highlighting the  
11 benefits of stopping smoking in a gentle and relaxed manner to encourage choice to quit.

12  
13  
14 **Table 4. Illustrative quotes (focus groups)**

| Theme                                                                                                                                                                            | Quote                                                                                                                                                                                                                                                                                                                                                                                                                                                                                                                                                                                                                                                                                                          |
|----------------------------------------------------------------------------------------------------------------------------------------------------------------------------------|----------------------------------------------------------------------------------------------------------------------------------------------------------------------------------------------------------------------------------------------------------------------------------------------------------------------------------------------------------------------------------------------------------------------------------------------------------------------------------------------------------------------------------------------------------------------------------------------------------------------------------------------------------------------------------------------------------------|
| <b>Barriers to lung cancer symptom presentation</b><br>Fixation on chest infections<br><br>Difference in perception around healthcare professional approach to patients' smoking | <i>"People tend to be fixated on a [chest] infection and they want their next rescue pack ready cos almost as if it's inevitable; it's going to happen in the next month or so."</i> (Focus group 4)<br><br><i>"I think there is a gulf between what people believe their GP would say to them if they do actually talk about [smoking] as opposed to what that conversation actually is in reality....But certainly as far as the formal training coming out of public health, if they are doing that then there is, that's not a lecture...But that's what people fear is going to be what they're going to be told"</i> (Focus group 3)                                                                     |
| <b>Potential format of an intervention to support earlier lung cancer detection</b>                                                                                              | <i>Participant 2: "So what I'm saying is, you know them mobile buses... in the shopping area, where people go shops, or outside the hospital... So they set them up and people are walking past, and even though they can't be bothered to go to the doctors, and they look and they think I'll just pop in"</i><br><i>Participant 1: Cos you wouldn't hesitate you know, you'd just go in.</i><br><i>Participant 2: You're just a person, they don't know and they're just seeing what's there, or what's there or what's the problem with you. If there's no problem"</i><br><i>Participant 3: People think you don't want to think you're, feel as if you're wasting the doctor's time"</i> (Focus group 1) |
| <b>Intervention content</b><br>More specific symptom advice                                                                                                                      | <i>Participant 1: "Yeah I think when you say 'cough' it's a bit broad and it's a bit...You know, you've had a cough for two weeks, off you go."</i>                                                                                                                                                                                                                                                                                                                                                                                                                                                                                                                                                            |

|                                            |                                                                                                                                                                                                                                                                                                                                                                                                                                                                                                                                                                                                                                                              |
|--------------------------------------------|--------------------------------------------------------------------------------------------------------------------------------------------------------------------------------------------------------------------------------------------------------------------------------------------------------------------------------------------------------------------------------------------------------------------------------------------------------------------------------------------------------------------------------------------------------------------------------------------------------------------------------------------------------------|
| <p>Messages to combat negative beliefs</p> | <p><i>Participant 3: It'd be useful if it was a change in your regular cough" (Focus group 4)</i></p> <p><i>"Positive messages, particularly around lung cancer because everybody, you know it's like a death knell isn't it? And actually it's not, it doesn't have to be. You know you're talking here about early diagnosis which is a big deal isn't it" (Focus group 3)</i></p>                                                                                                                                                                                                                                                                         |
| <p>Smoking cessation</p>                   | <p><i>"You've got to include [smoking cessation information]...I think it's how you deliver the message...not in such a way you feel ashamed for smoking. I've noticed [the nurse] has got a way of telling patients how to stop smoking, she does it in a, not in a 'well you should stop smoking', that kind of way. She'll say 'have you ever thought about giving it up. You know it would improve your chest a bit'. And I've seen [the nurse do it] more in a non-lecturey basis, more of a, 'have you ever thought about it?' Relaxed, warmer manner. So I'm not lecturing you, it's your choice. You know it's bad for you." (Focus group 4)</i></p> |

1  
2  
3  
4  
5  
6  
7  
8  
9  
10  
11  
12  
13  
14  
15  
16  
17  
18  
19  
20  
21  
22  
23  
24  
25  
26  
27  
28  
29  
30  
31  
32  
33  
34  
35  
36  
37  
38  
39  
40  
41  
42  
43  
44  
45  
46  
47  
48  
49  
50  
51  
52  
53  
54  
55  
56  
57  
58  
59  
60

## DISCUSSION

Our study was the first to explore the influences on lung cancer symptom presentation in high risk, highly deprived groups across three nations of the UK. Preferences for an intervention targeted at high-risk groups were ascertained through focus groups. We found evidence from the interviews and focus groups that individuals who are at high risk for lung cancer tend to be preoccupied by maintaining health in the short term. Prioritising the daily management of their lung condition led to avoidance of longer term health problems such as lung cancer, to gain a sense of control over health in the context of difficult personal circumstances. Health beliefs were found to underpin behaviour in relation to medical help seeking, where perceptions of 'inevitable but curable' chest infections led to immediate help seeking. However, 'inevitable but incurable' lung cancer led to inaction when faced with potentially serious symptoms and anticipated refusal of treatment. Interview participants felt that the relationship with the healthcare professional was key when considering medical help seeking. The importance of the relational interaction between provider and patient was mirrored in the focus groups, where participants felt that a non-judgemental intervention facilitator was important. Multi-faceted community-based interventions, away from the traditional healthcare setting, were preferred by participants.

Previous empirical studies report prolonged lung cancer symptom presentation due to misattribution[5,13,15-26,33, 42] and in our study, we found evidence that participants normalised their symptoms indicative of lung cancer to smoking habit, and lung and other comorbid conditions. In contrast to previous studies that report haemoptysis as a facilitator to prompt medical help seeking[13,25,27,43-45], participants with experience of haemoptysis reported described avoidant coping, and normalisation when blood was noticed. Denial and normalisation of haemoptysis may be specific to socioeconomically deprived groups. Our highly deprived sample reported daily struggles with complex physical and mental health needs, and with the challenges associated with living on no or limited income. Previous studies in socioeconomically deprived communities report that in the context of competing life demands, health was dealt with reactively and with low priority[46,47].

Fear of being ineligible for treatment due to lifestyle has not been well described in studies with lung cancer patients or those at high risk[44,48]. In contrast, participants in the current study described feeling disentitled to medical services in the context of their lifestyle and circumstances. The underlying concept of health service Candidacy[47] may explain why participants felt unworthy of seeking medical help and is likely to be of particular importance in our highly deprived sample. In addition to challenging life circumstances, interview and focus group participants reported fear of

1  
2  
3 1 being judged and ignored by health professionals due to their smoking habit or perceived social  
4 standing, contributing to feelings of unworthiness. Participants reported the desire to be a model  
5 2 patient and to not waste valuable GP time, which influenced medical help seeking. Although the  
6 3 desire to be a 'good citizen' has previously been reported[24,25], to our knowledge, the current  
7 4 study was the first to explore perceptions of appropriate consultation behaviour in a highly deprived  
8 5 sample. Our emerging findings related to Candidacy, combined with the desire to exhibit 'good'  
9 6 consultation behaviour, may contribute to normalisation of symptoms previously regarded as  
10 7 serious and therefore discourage help seeking. Consequently, disadvantaged populations are likely  
11 8 to focus on health in the short term, and ignore longer-term health issues which may lead to  
12 9 advanced stage lung cancer diagnosis.  
13 10  
14 11

15 12 We found that participants held seemingly contradictory views on their lung cancer susceptibility,  
16 13 reporting scepticism about the causal role of smoking in lung cancer alongside perceived inevitability  
17 14 of lung cancer. Beliefs about the link between smoking and lung cancer may reflect societal stigma  
18 15 towards smoking, where participants downplay the negative effects of smoking, possibly to  
19 16 legitimise medical help seeking for symptoms considered related to smoking. Perceived inevitability  
20 17 of lung cancer is likely to reflect high levels of exposure in social networks where there is high  
21 18 incidence and poor outcomes of lung cancer [10] and can to minimise normalisation of lung cancer  
22 19 symptoms and prompt help seeking[49]. However, contrary to previous studies, our sample  
23 20 reported feeling that lung cancer was inevitable, but normalised and ignored haemoptysis, possibly  
24 21 due to a combination of high fear and fatalism of lung cancer, difficult life circumstances and low  
25 22 perceived health service Candidacy. Furthermore, our findings raise questions of perceived social  
26 23 justice as influences on medical help seeking. High-risk individuals who believe that they cannot  
27 24 legitimately seek medical help because of their former or current lifestyle may therefore be resigned  
28 25 to the prospect of developing lung cancer.  
29 26  
30 27

31 28 A major strength of this study was the rigorous sampling procedure. We screened postcodes to  
32 29 ensure participants resided in the lowest quintile of deprivation, and measured multiple additional  
33 30 indicators of deprivation. Individual and area level indicators confirm that our sample was highly  
34 31 deprived, for instance most were unemployed and seeking benefits, and rented social housing. In  
35 32 addition, we recruited participants with no previous diagnosis of lung cancer, without mention of  
36 33 lung cancer until discussed by participants during the interview, or at the end of the interview. These  
37 34 recruitment and interview procedures meant we were able to explore previous and anticipated lung  
38 39 cancer symptom presentation in those who were symptomatic or asymptomatic. This strategy was  
39 40  
40 41  
41 42  
42 43  
43 44  
44 45  
45 46  
46 47  
47 48  
48 49  
49 50  
50 51  
51 52  
52 53  
53 54  
54 55  
55 56  
56 57  
57 58  
58 59  
59 60  
60

1 employed to overcome the methodological limitations associated with studying either retrospective  
2 or anticipated symptom presentation in isolation[15]. However, our qualitative study was unable to  
3 establish causal links between barriers and help seeking, nor can we generalise or compare the  
4 findings to high socioeconomic groups; instead, we conducted an in-depth study to explore how best  
5 to engage high risk, highly deprived individuals in early lung cancer detection. Although we carefully  
6 sampled participants and collected additional demographic measures to validate our sampling  
7 frame, some GP practices were asked to recruit by specific smoking status rather than the whole  
8 range of smoking status, potentially introducing bias to our sample. In addition, we were unable to  
9 conduct a focus group in Scotland due to low response, which is a potential limitation of the study.  
10 Finally, focus group participants were recruited opportunistically, with the potential that participants  
11 were more favourably disposed to an intervention.

### 13 **Practice and policy implications**

15 With a comorbid lung condition and smoking history, those who are high risk for lung cancer will, in  
16 the main, be symptomatic. To avoid normalisation, it is important to highlight the significance of  
17 changing and multiple symptoms. High risk individuals should be empowered to seek timely medical  
18 help and made to feel welcome, not judged or blamed for their current or former lifestyle. For  
19 instance, interventions targeted at disadvantaged populations could be conducted outside of the  
20 traditional healthcare setting. Our findings highlight the importance of an intervention where  
21 participants would be invited to attend, as opposed to presenting to the GP surgery, in order to  
22 eliminate concerns about wasting GP time and legitimise their attendance. Community based  
23 interventions have the potential to harness the relational aspects of help seeking, through  
24 interventions led by non-judgemental and welcoming facilitators. It is possible that previous mass  
25 media and social marketing lung cancer awareness interventions report low campaign reach to  
26 deprived groups [34,35] in part because they were not designed to motivate help seeking through  
27 intensive approaches to build trusting relationships and confidence. More research is required to  
28 understand how the relational aspects of help seeking could be operationalised in an intervention.

30 Over half of the current sample described mental health problems and/or difficult current or former  
31 life circumstances. Intervention developers and healthcare professionals in highly deprived  
32 communities should be aware of these wider social and contextual factors; they should receive  
33 training to recognise such circumstances and know how to appropriately signpost. Finally, we  
34 suggest that the current UK health system may encourage patients with a lung condition to focus on

1  
2  
3 1 short term management of their condition. GP prescribing of antibiotics and the use of rescue packs  
4  
5 2 (prescribed antibiotics for storage at home in the event of an exacerbation) may inadvertently  
6  
7 3 reinforce patients to detect and act on symptoms of a chest infection[50]. There is potential that this  
8  
9 4 current standard of care could be adapted to educate and encourage patients with a lung condition  
10  
11 5 to detect symptoms of lung cancer, thereby shifting the focus to longer term health. More research  
12  
13 6 is required to understand how to motivate highly deprived groups to consider health in the long  
14  
15 7 term, while recognising the wider social determinants of health[51].  
16  
17 8

## 18 9 **Conclusion**

19  
20 11 The challenges of living in an area of deprivation with social exclusion issues, combined with fear of  
21  
22 12 judgement by health professionals, contribute to denial and ignoring of lung cancer symptoms.  
23  
24 13 Multi-faceted community based interventions are required to, highlight lung cancer symptoms, the  
25  
26 14 importance of early diagnosis and empower people who are high risk for lung cancer to seek timely  
27  
28 15 medical help.  
29  
30 16  
31 17  
32 18  
33 19  
34 20  
35 21  
36 22  
37 23  
38 24  
39 25  
40 26  
41 27  
42 28  
43 29  
44 30  
45 31  
46 32  
47 33  
48 34  
49  
50  
51  
52  
53  
54  
55  
56  
57  
58  
59  
60



1  
2  
3 1 **Additional information**  
4  
5 2

6 3 **Ethics approval and consent to participate**  
7

8 4 The study received ethical approval from Southampton Central- Hampshire A Research Ethics  
9 5 Committee (16/SC/0589). Written informed consent was obtained from all participants who took  
10 6 part in the study.  
11  
12  
13 7

14 8 **Consent for publication**  
15

16 9 Not applicable  
17  
18 10

19 11 **Data sharing**  
20

21 12 Qualitative data is not publicly available for this study to maintain participant confidentiality.  
22  
23 13

24 14 **Competing interests**  
25

26 15 The authors confirm that there are no conflicts of interest.  
27  
28 16

29 17 **Funding**  
30

31 18 This work was supported by Cancer Research UK (grant reference number: C16377/A22034).  
32  
33 19

34 20 **Author contributorship**  
35

36 21 All authors (GMM, JH, KH, PM, RDN, GN, ST, AMT, KB) designed the study. GMM and JH conducted,  
37 22 coded and analysed the interviews and focus group data. All authors contributed to the  
38 23 interpretation of data. GMM drafted the manuscript and all authors contributed to the review and  
39 24 editing of the manuscript. All authors read and approved the final manuscript.  
40  
41  
42  
43 25

44 26 **Acknowledgements**  
45

46 27 We would like to thank everyone who helped with recruitment for this study, and all the participants  
47 28 who took part in the study; without these individuals this study would not have been possible. We  
48 29 would like to thank the Advisory Group (Anthony Byrne, Gareth Collier, Adrian Edwards, Dyfed  
49 30 Huws, David Lewis, Maura Matthews and Fiona Walter) and the study Administrator Lucy Watkins,  
50 31 for their ongoing support and advice throughout the study.  
51  
52  
53  
54 32

55 33

56 34

57 35

58 36

59 37

60 38

## References

1. Bray F, Ferlay J, Soerjomataram I, Siegel RL, Torre LA, Jemal A. Global cancer statistics 2018: GLOBOCAN estimates of incidence and mortality worldwide for 36 cancers in 185 countries. *CA: A Cancer Journal for Clinicians*. 2018;68(2):394-424. doi: 10.3232/ca180712.
2. Allemani C, Matsuda T, Di Carlo V, Harewood R, Matz M, Nikšić M, et al. Global surveillance of trends in cancer survival 2000-2014 (CONCORD-3): analysis of individual records for 37 025 patients diagnosed with one of 18 cancers from 322 population-based registries in 71 countries. *The Lancet*. 2018;391(10125):1023-75. doi: 10.1016/S0140-6736(18)30854-5.
3. McPhail S, Johnson S, Greenberg D, et al. Stage at diagnosis and early mortality from cancer in England. *BJC* 2015;112(1):108-15. doi: 10.1038/bjc.2015.49.
4. Barrett J, Hamilton W. Pathways to the diagnosis of lung cancer in the UK: a cohort study. *BMC Med Prac*. 2008;9(31). doi: 10.1186/1471-2296-9-31.
5. Mitchell ED, Rubin G, Macleod U. Understanding diagnosis of lung cancer in primary care: qualitative synthesis of significant event audit reports. *BJGP* 2013;63(606):37-46. doi: 10.3399/bjgp13X660760.
6. Lyratzopoulos G, Neal RD, Barbiere J, et al. Variation in number of general practitioner consultations before hospital referral for cancer: findings from the 2010 National Cancer Patient Experience Survey in England. *Lancet Oncol* 2012;13(4):353-65. doi: 10.1016/S1470-2045(12)70041-4.
7. Iyen-Omofoman B, Tata L, Baldwin DR, et al. Using socio-demographic and early clinical features in general practice to identify people with lung cancer earlier. *Thorax* 2012;68:451-9. doi: 10.1136/thorax-2011-201582.
8. Hipsley-Cox J, Coupland C. Identifying patients with suspected lung cancer in primary care: derivation and validation of an algorithm. *BJGP* 2011;61(592):715-23. doi: 10.3399/bjgp11X606627.
9. NICE. NICE guidelines for lung cancer: diagnosis and management. *NICE*. 2015. Available at: <https://www.nice.org.uk/guidance/cg121> [accessed 04.06.2018].
10. National Cancer Registration and Analysis Service. Cancer by deprivation in England: 1996-2011. 2014. Available at: [http://www.ncin.org.uk/about\\_ncin/cancer\\_by\\_deprivation\\_in\\_england](http://www.ncin.org.uk/about_ncin/cancer_by_deprivation_in_england) [accessed 04.06.2018].
11. Sekine Y, Katsura H, Koh E, et al. Early detection of COPD is important for lung cancer surveillance. *Eur Resp J* 2012;39(5):1230-40. doi: 10.1183/09031936.00126011.
12. Malhotra J, Malvezzi M, Negri E, et al. Risk factors for lung cancer worldwide. *Eur Resp J* 2016;48:899-902. doi: 10.1183/13993003.00359-2016.

- 1  
2  
3 1 13. Smith SM, Campbell NC, MacLeod U *et al*. Factors contributing to the time taken to consult  
4 with symptoms of lung cancer: a cross-sectional study. *Thorax* 2009;**64**(6):523-31.  
5 2  
6 3 14. Friedemann-Smith C, Whitaker K, Winstanley K, Wardle J. Smokers are less likely than non-  
7 smokers to seek help for a lung cancer 'alarm' symptom. *Thorax* 2016;**71**(7).  
8 4  
9 doi.org/10.1136/thoraxjnl-2015-208063  
10 5  
11 6 15. Brouselle A, Breton M, Benhadj L *et al*. Explaining time elapsed prior to cancer diagnosis:  
12 patients' perspectives. *BMC Health Serv Res* 2017;**17**(1):448. doi: 10.1186/s12913-017-2390-1.  
13 7  
14 16. McLachlan S, Mansell G, Sanders T *et al*. Symptom perceptions and help-seeking behaviour  
15 prior to lung and colorectal cancer diagnoses: a qualitative study. *Fam Pract*. 2015;**32**(5):568-77.  
16 9  
17 doi: 10.1093/fampra/cmz048.  
18 10  
19 17. Caswell G, Seymour J, Crosby V *et al*. Lung cancer diagnosed following an emergency  
20 admission: exploring patient and carer perspectives on delay in seeking help. *Sup Care Cancer*  
21 12  
22 2017;**25**(7):2259-66. doi: 10.1007/s00520-017-3633-8.  
23 13  
24 18. Brindle L, Pope C, Corner J, *et al*. Eliciting symptoms interpreted as normal by patients with  
25 early-stage lung cancer: could GP elicitation of normalised symptoms reduce delay in diagnosis?  
26 Cross-sectional interview study. *BMJ Open* 2012;**2**(6):1977. doi.org/10.1136/bmjopen-2012-001977.  
27 15  
28 16 19. Lyratzopoulos G, Vedsted P, Singh H. Understanding missed opportunities for more timely  
29 diagnosis of cancer in symptomatic patients after presentation. *BJC* 2015;**112**(1):84-91. doi:  
30 17  
31 10.1038/bjc.2015.47.  
32 18  
33 20 20. Emery JD, Walter FM, Gray V *et al*. Diagnosing cancer in the bush: a mixed-methods study of  
34 symptom appraisal and help-seeking behaviour in people with cancer from rural Western Australia.  
35 20  
36 *Fam Pract* 2013;**30**(5):541-50. doi: 10.1093/fampra/cms087.  
37 21  
38 21. Birt L, Hall N, Emery J *et al*. Responding to symptoms suggestive of lung cancer: a qualitative  
39 interview study. *BMJ Open* 2014;**11**(1);doi: 10.1136/bmjresp-2014-000067.  
40 23  
41 22. Chatwin J, Sanders C. The influence of social factors on help-seeking for people with lung  
42 cancer. *Eur J Cancer Care*. 2013;**22**(6):709-13. doi: 10.1111/ecc.12078.  
43 25  
44 23. Carter-Harris L. Lung Cancer Stigma as a Barrier to Medical Help-Seeking Behavior: Practice  
45 Implications. *J Am Assoc Nurse Pract* 2015;**27**(5):240-5. doi: 10.1002/2327-6924.12227.  
46 27  
47 24. Tod A, Craven J, Allmark P. Diagnostic delay in lung cancer: a qualitative study. *J Adv Nurs*  
48 2008;**61**(3):336-43. doi: 10.1111/j.1365-2648.2007.04542.x.  
49 28  
50 25. Tod A, Joanne R. Overcoming delay in the diagnosis of lung cancer: a qualitative study. *Nurs*  
51 *Standard* 2010;**24**(31):34-43. doi: 10.7748/ns2010.04.24.31.35.c7690.  
52 30  
53 26. Corner J, Hopkinson J, Roffe L. Experience of health changes and reasons for delay in seeking  
54 care: a UK study of the months prior to the diagnosis of lung cancer. *Thorax* 2006;**60**:1382-91.  
55 32  
56 33  
57 34  
58  
59  
60

- 1  
2  
3 1 27. Braybrook DE, Witty KR, Robertson S. Men and lung cancer: a review of the barriers and  
4 2 facilitators to male engagement in symptom reporting and screening. *J Men's Health* 2011;**8**(2):93-9.  
5 3 <https://doi.org/10.1016/j.jomh.2011.03.002>.  
6 4  
7 8 28. Chapple A, Ziebland S, McPherson A. Stigma, shame, and blame experienced by patients  
8 5 with lung cancer: qualitative study. *BMJ* 2004;**328**:1470. [doi.org/10.1136/bmj.38111.639734.7C](https://doi.org/10.1136/bmj.38111.639734.7C).  
9 6  
10 29. Murray SA, Kutzer Y, Habgood E *et al*. Reducing barriers to consulting a General Practitioner  
11 7 in patients at increased risk of lung cancer: a qualitative evaluation of the CHEST Australia  
12 8 intervention. *Fam Pract* 2017;**34**(6):740-6. [doi.org/10.1093/fampra/cmz057](https://doi.org/10.1093/fampra/cmz057).  
13 9  
14 30. Marlow LA, Waller J, Wardle J. Does lung cancer attract greater stigma than other cancer  
15 10 types? *Lung Cancer* 2015;**88**(1):104-7. [doi: 10.1016/j.lungcan.2015.01.024](https://doi.org/10.1016/j.lungcan.2015.01.024).  
16 11  
17 31. Quaife S, McEwen A, James S, Wardle J. Smoking is associated with pessimistic and avoidant  
18 12 beliefs about cancer: results from the International Cancer Benchmarking Partnership. *BJC*. 2015  
19 13 **112**(11):1799-804. [doi: 10.1038/bjc.2015.148](https://doi.org/10.1038/bjc.2015.148).  
20 14  
21 32. Quaife S, Marlow L, McEwen A, Wardle J. Attitudes towards lung cancer screening in  
22 15 socioeconomically deprived and heavy smoking communities: informing screening communication.  
23 16 *HEX* 2017;**20**(4):563-73. [doi: 10.1111/hex.12481](https://doi.org/10.1111/hex.12481).  
24 17  
25 33. Mor V, Masterson-Allen S, Goldberg R, *et al*. Pre-diagnostic symptom recognition and help  
26 18 seeking among cancer patients. *J Community Health* 1990;**15**(4):253-66.  
27 19  
28 34. Moffat J, Bentley A, Ironmonger L, Boughey A, Radford G, Duffy S. The impact of national  
29 20 cancer awareness campaigns for bowel and lung cancer symptoms on sociodemographic inequalities  
30 21 in immediate key symptom awareness and GP attendances. *British Journal Of Cancer*. 2015;**112**:S14.  
31 22  
32 35. Kennedy MPT, Cheyne L, Darby M, Plant P, Milton R, Robson JM, *et al*. Lung cancer stage-shift  
33 23 following a symptom awareness campaign. *Thorax*. 2018.  
34 24  
35 36. Smith S, Fielding S, Murchie P, Johnston M, Wyke S, Powell R, *et al*. Reducing the time before  
36 25 consulting with symptoms of lung cancer: a randomised controlled trial in primary care. *The British*  
37 26 *Journal of General Practice*. 2013;**63**(606):e47-e54.  
38 27  
39 37. Tong A, Sainsbury P, Craig J. Consolidated criteria for reporting qualitative research (COREQ):  
40 28 a 32-item checklist for interviews and focus groups. *Int J Quality Health Care* 2007;**19**(6):349-57.  
41 29  
42 38. Leventhal H, Brissette I, Leventhal E. The common-sense model of self-regulation of health  
43 30 and illness. In: *The Self-regulation of Health and Illness Behaviour*. *Routledge*. 2003:42-65.  
44 31  
45 39. Francis JJ, Johnston M, Robertson C *et al*. What is an adequate sample size? Operationalising  
46 32 data saturation for theory-based interview studies. *Psych Health* 2010;**25**(10):1229-45. [doi:](https://doi.org/10.1080/08870440903194015)  
47 33 [10.1080/08870440903194015](https://doi.org/10.1080/08870440903194015).  
48 34  
49 40. Ritchie LD, Lewis J. *Qualitative Research Practice: A Guide for Social Science Students and*  
50 35 *Researchers*. Sage: London. 2003.  
51 36  
52  
53  
54  
55  
56  
57  
58  
59  
60

- 1  
2  
3 1 41. Ward D.J., Furber C., Tierney S., Swallow V. (2013) Using Framework Analysis in nursing  
4 2 research: a worked example. *Journal of Advanced Nursing* 69(11), 2423–2431. 10.1111/jan.12127  
5 3  
6 42. Anderson R, Paarup B, Vedsted P, *et al.* 'Containment' as an analytical framework for  
7 3 understanding patient delay: a qualitative study of cancer patients' symptom interpretation  
8 4 processes. *Soc Sci Med* 2010;**71**(2):378-85. doi: 10.1016/j.socscimed.2010.03.044.  
9 5  
10 43. Chan W, Clark A, Dervedde U *et al.* Symptoms, delay to presentation and survival in lung  
11 6 cancer. *Thorax* 2016;**71**(3):80-1.  
12 7  
13 44. Corner J, Hopkinson J, Fitzsimmons D, *et al.* Is late diagnosis of lung cancer inevitable?  
14 8 Interview study of patients' recollections of symptoms before diagnosis. *Thorax* 2005;**60**:314-9.  
15 9 doi.org/10.1136/thx.2004.029264.  
16 10  
17 45. Dobson C, Russell A, Brown S, Rubin G. The role of social context in symptom appraisal and  
18 11 help-seeking among people with lung or colorectal symptoms: A qualitative interview study. *Eur J*  
19 12 *Cancer Care* 2018;**27**(2):e12815. doi: 10.1111/ecc.12815.  
20 13  
21 46. Smits S, McCutchan G, Wood F *et al.* Development of a Behavior Change Intervention to  
22 14 Encourage Timely Cancer Symptom Presentation Among People Living in Deprived Communities  
23 15 Using the Behavior Change Wheel. *Annals Beh Med.* 2016;**52**(6):474-488. doi: 10.1007/s12160-016-  
24 16 9849-x.  
25 17  
26 47. Dixon-Woods M, Cavers D, Agarwal S *et al.* Conducting a critical interpretive synthesis of the  
27 18 literature on access to healthcare by vulnerable groups. *BMC Med Res Method* 2006;**6**(35).  
28 19 doi.org/10.1186/1471-2288-6-35.  
29 20  
30 48. Smith SM, Murchie P, Devereux G, Johnston M, Lee AJ, Macleod U, *et al.* Developing a complex  
31 21 intervention to reduce time to presentation with symptoms of lung cancer. *The British Journal of*  
32 22 *General Practice.* 2012;**62**(602):e605-e15.  
33 23  
34 49. Macdonald S, Watt G, Macleod U. In search of the cancer candidate: can lay epidemiology  
35 24 help? *Soc Health Illness* 2013;**35**(4):575-91. doi: 10.1111/j.1467-9566.2012.01513.x.  
36 25  
37 50. NICE. NICE guidelines for lung cancer: diagnosis and management. *NICE.* 2015. Available at:  
38 26 <https://www.nice.org.uk/guidance/cg121> [accessed 04.06.2018].  
39 27  
40 51. Barton H, Grant M. A health map for the local human habitat. *J Royal Soc Promotion Health.*  
41 28 2006;**126**(6):252-3.  
42 29  
43 30  
44 31  
45  
46  
47  
48  
49  
50  
51  
52  
53  
54  
55  
56  
57  
58  
59  
60

**Supplementary File 1. Consolidated criteria for reporting qualitative studies (COREQ): 32-item checklist with page numbers to indicate section of the article [34]**

| Checklist item                                 | Questions to consider                                                                                                                                           | Page number in article |
|------------------------------------------------|-----------------------------------------------------------------------------------------------------------------------------------------------------------------|------------------------|
| <b>Domain 1: Research team and reflexivity</b> |                                                                                                                                                                 |                        |
| <b>Personal Characteristics</b>                |                                                                                                                                                                 |                        |
| 1. Interviewer/facilitator                     | Which author/s conducted the interview or focus group?                                                                                                          | 8                      |
| 2. Credentials                                 | What were the researcher's credentials? <i>E.g. PhD, MD</i>                                                                                                     | 8                      |
| 3. Occupation                                  | What was their occupation at the time of the study?                                                                                                             | 8                      |
| 4. Gender                                      | Was the researcher male or female?                                                                                                                              | 8                      |
| 5. Experience and training                     | What experience or training did the researcher have?                                                                                                            | 8                      |
| <b>Relationship with participants</b>          |                                                                                                                                                                 |                        |
| 6. Relationship established                    | Was a relationship established prior to study commencement?                                                                                                     | 7                      |
| 7. Participant knowledge of the interviewer    | What did the participants know about the researcher? <i>e.g. personal goals, reasons for doing the research</i>                                                 | 7                      |
| 8. Interviewer characteristics                 | What characteristics were reported about the interviewer/facilitator? <i>e.g. Bias, assumptions, reasons and interests in the research topic</i>                | 8                      |
| <b>Domain 2: study design</b>                  |                                                                                                                                                                 |                        |
| <b>Theoretical framework</b>                   |                                                                                                                                                                 |                        |
| 9. Methodological orientation and Theory       | What methodological orientation was stated to underpin the study? <i>e.g. grounded theory, discourse analysis, ethnography, phenomenology, content analysis</i> | 8-9                    |
| <b>Participant selection</b>                   |                                                                                                                                                                 |                        |
| 10. Sampling                                   | How were participants selected? <i>e.g. purposive, convenience, consecutive, snowball</i>                                                                       | 5-6                    |
| 11. Method of approach                         | How were participants approached? <i>e.g. face-to-face, telephone, mail, email</i>                                                                              | 6-7                    |
| 12. Sample size                                | How many participants were in the study?                                                                                                                        | 5, 6, 10, 16           |
| 13. Non-participation                          | How many people refused to participate or dropped out? Reasons?                                                                                                 | 9                      |
| <b>Setting</b>                                 |                                                                                                                                                                 |                        |
| 14. Setting of data collection                 | Where was the data collected? <i>e.g. home, clinic, workplace</i>                                                                                               | 8                      |
| 15. Presence of non-participants               | Was anyone else present besides the participants and researchers?                                                                                               | 8                      |
| 16. Description of sample                      | What are the important characteristics of the sample? <i>e.g. demographic data, date</i>                                                                        | 9-10, 16               |
| <b>Data collection</b>                         |                                                                                                                                                                 |                        |
| 17. Interview guide                            | Were questions, prompts, guides provided by the authors? Was it pilot tested?                                                                                   | Appendix 2-4           |

|                                        |                                                                                                                                          |              |
|----------------------------------------|------------------------------------------------------------------------------------------------------------------------------------------|--------------|
| 18. Repeat interviews                  | Were repeat interviews carried out? If yes, how many?                                                                                    | 6            |
| 19. Audio/visual recording             | Did the research use audio or visual recording to collect the data?                                                                      | 6, 8         |
| 20. Field notes                        | Were field notes made during and/or after the interview or focus group?                                                                  | 8            |
| 21. Duration                           | What was the duration of the interviews or focus group?                                                                                  | 8            |
| 22. Data saturation                    | Was data saturation discussed?                                                                                                           | 7            |
| 23. Transcripts returned               | Were transcripts returned to participants for comment and/or correction?                                                                 |              |
| <b>Domain 3: analysis and findings</b> |                                                                                                                                          |              |
| <b>Data analysis</b>                   |                                                                                                                                          |              |
| 24. Number of data coders              | How many data coders coded the data?                                                                                                     | 8            |
| 25. Description of the coding tree     | Did authors provide a description of the coding tree?                                                                                    | 8-9          |
| 26. Derivation of themes               | Were themes identified in advance or derived from the data?                                                                              | 8-9          |
| 27. Software                           | What software, if applicable, was used to manage the data?                                                                               | 8-9          |
| 28. Participant checking               | Did participants provide feedback on the findings?                                                                                       | 8-9          |
| <b>Reporting</b>                       |                                                                                                                                          |              |
| 29. Quotations presented               | Were participant quotations presented to illustrate the themes / findings? Was each quotation identified? <i>e.g. participant number</i> | 14-16, 18-19 |
| 30. Data and findings consistent       | Was there consistency between the data presented and the findings?                                                                       | 11-19        |
| 31. Clarity of major themes            | Were major themes clearly presented in the findings?                                                                                     | 11-19        |
| 32. Clarity of minor themes            | Is there a description of diverse cases or discussion of minor themes?                                                                   | 11-19        |

## Supplementary File 2: Interview topic guide

### Interview prologue

- Introduce the researcher, ensure the participant is comfortable.
- Explain purpose of the interview:
  - *“We are interested in lung health.*
  - *We would like to know how people cope with lung symptoms and how they decide if they should go to the doctor or not.*
  - *Some of the questions I ask during the interview will be about smoking. I’m not here to tell you to stop smoking; I’m just interested if you have any experiences of smoking.*
  - *I’m not a clinician so I can’t give you any advice on symptoms, but I can tell you where you can go to get help”*
- Check understanding of interview purpose, role of researcher, and what will happen in the interview. Give opportunity for questions.
- Partners or family members will be welcome to join the interviews to explore relational influences on lung symptom awareness and help seeking, and the interview topic guide will be adapted accordingly.
- After establishing what is understood about the study, and answering any questions, explain that the interview will be recorded. Obtain consent for the interview and for the recording. If not already done, set up and switch on the recording equipment while the participant signs the consent form.

*Note to interviewer: the grey boxes signify the key topics to be explored during the interview. The questions listed below are examples of suggested prompts for each topic. You are not required to read these verbatim unless specified.*



**Overall aim of the qualitative interview:**

**-To explore how people with a history of smoking and respiratory conditions interpret and act on new or changing lung symptoms (how people cope with lung symptoms and how they decide to go to the doctor with symptoms)**

**-To explore the influences of perceived risk, fear, shame, stigma, family and friends on lung symptom presentation**

**1. Experiences of lung condition**

Establish what lung condition the participant has, how the lung condition affects them, the types of symptoms they experience and how they are usually managed.

*Rationale: introduce the participant to the format of a qualitative interview and make the participant feels comfortable. Establish details of their lung condition.*

**Potential prompts:**

- Can you tell me about your lung condition?
- Tell me about your experiences with X lung condition.
  - How long have you had X condition?
  - What sort of symptoms do you experience?
  - How long do the symptoms usually last?
- What do you think causes these symptoms?
- How do you usually manage your symptoms?
- How are your symptoms usually managed/ treated by your healthcare professional?
  - How effective do you think this is?

## 2. Symptom attribution task

Use as a tool for prompting an in-depth understanding of symptom attributions and confidence to interpret new or changing symptoms.

Include discussion around previous symptom experiences including: what action was taken, if and who they sought medical help from. Explore how their lung condition and smoking history might influence symptom attributions (i.e. do these mask symptoms?) and symptom presentation.

**Rationale:** to explore lung symptom attribution; confidence in recognising and articulating symptoms; previous symptom experience; planning when/how to act on symptoms; influence of smoking history on perceptions of lung symptoms

Ask participant to order symptom cards from symptoms that they would seek medical help quickest for and those they would seek help slowest for (arrow and boxes below will be stretched to A4 size, see page 10). Ask participant to write numbers on the symptom cards. 1= first, 11=last. If they change the order of the symptom, ensure the previous number is crossed out and the new number written on card. Write PID on the back of each symptom card. Take photos of the task.

Say the following phrase verbatim: "We know that people decide go to the doctor at different times with symptoms. I'm going to show you some pieces of card with symptoms on. I'd like you to rank them from the ones that you would go to the doctor with first through to the last on this sheet of paper."

Cut individual symptom cards (see page 12) for the following symptoms. Please rotate the order:

- Coughing up blood
- A cough that doesn't go away
- A long standing cough that gets worse
- Pain in your chest or shoulder
- Persistent breathlessness
- Persistent chest infections
- Persistent tiredness or lack of energy
- Loss of appetite or unexplained weight loss
- Ache or pain when breathing or coughing
- A hoarse voice
- Changes in the appearance of your fingers, such as becoming more curved or their ends becoming larger

See the **glossary of terms at the end of the topic guide** with standardised definitions and additional explanation of symptoms. If the participant does not understand what each symptom means, ask them what they think it means, then refer to the glossary of terms.

First to go to  
the doctor

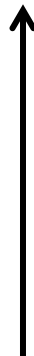

Last to go to  
the doctor

If the participant asks the interviewer what these symptoms are, first **ask the participant what they think they are**. If they ask again either suggest to move on and discuss what they could be after the interview (if appropriate) or say the symptoms have been taken from the NHS website for lung cancer.

*Note to interviewer:* Aim to complete the ordering of symptoms in the task first, and then ask questions in this section. However, if any of the following (2a, 2b, 2c, 2d) is brought up spontaneously by the participant whilst they are doing the card sorting exercise then explore these issues at that point. Then return to the card sorting exercise, followed by questions in the following section (2a, 2b, 2c, 2d).

Topics and prompts for symptom attribution task

Once the symptoms have been ordered, ask:

- Can you tell me why you put x first?
- Can you tell me why you put x last?

### **2a. Symptom experience**

To understand if the participant has experienced the symptom previously- what did they attribute the symptom to? What did they do? If they have not experienced the symptom before, what would they hypothetically do if they were to experience symptom in the future?

- Which of these symptoms have you had before?
  - What did you think the symptom(s) was/were?
  - Which symptom(s) did you go to the doctor with?
    - Why did you decide to go to the doctor with these symptoms?
    - What did the doctor say?
  - Which symptoms did you decide to not go to the doctor with?
    - Why did you decide not to go to the doctor with these symptoms?
- For the other symptoms we have not talked about, if you developed any of them what would you do?
  - How long do you think it would take you to go to the doctor with these symptoms?
  - Can you tell me why it would take you this amount of time to go to your doctor with this symptom?
  - What you think these symptoms could be?
- Are there any symptoms you wouldn't go to the doctor with?
  - Can you tell me why you wouldn't go to the doctor with these symptoms?

## **2b. Detecting change**

Explore how the participant has/would notice new or changing symptoms and their confidence to detect new and changing symptoms. Ask this section generally, but if the participant is struggling then ask them about confidence to detect new and changing symptoms in the context of previous symptoms experiences. i.e. earlier you mentioned you felt breathless for a long time, how confident did you feel to know that this was a new or changing symptom?

- How would you normally tell if any lung symptoms have changed/ are new/ or unusual for you?
  - What would you do if you think you noticed a change in a symptom?
  - How confident would you feel in recognising a change in your usual symptom(s)?
  - How confident would you feel recognising new symptoms?
  - How would you notice a change in any of these symptoms?

## **2c. Barriers**

Explore the influences of barriers and social influences on lung symptom presentation behavior

- Can you think of anything that would influence your decision to go to the doctor with any of these symptoms?
  - Probe barriers/enablers to going to the GP with a symptom:
    - Transport
    - Long wait times/ appointment policies
    - Worry about wasting the doctors time i.e. Some people have told us that they don't go to the doctor as they worry about wasting the doctors time. What do you think about this?
    - The influence of partner/ social influences (who suggested you go/ don't go to the doctor?)
    - How confident would you feel talking to the doctor about these symptoms?
      - How do you feel when you are talking to the doctor?

## **2d. Smoking**

Explore the influence of smoking habit on the ability to notice new or changing symptoms. If/how smoking habit acts as a barrier to seeking medical help. If vaping comes up say something like- that is really interesting, do you mind if I ask you some questions later about vaping if we have time? If they vape then still explore the influence of past smoking on symptom perceptions.

- Would you expect to have any of the symptoms we have talked about because you smoke or used to smoke?
  - Thinking about smoking, how do you think your [past] smoking would affect how you notice if a symptom has changed or is new/ unusual for you?
  - Does your doctor ever discuss smoking with you?
    - How does this make you feel?

### 3. Lung cancer

If appropriate, explore lung cancer knowledge, beliefs about lung cancer and perceived risk here. If brought up spontaneously by the participant earlier in the interview, explore lung cancer then (if appropriate) Confidence to detect a lung cancer symptom. The influences of smoking and perceived risk, shame and associated with lung cancer.

*Rationale:* to explore lung cancer symptom awareness; to explore perceived risk of lung cancer; to explore emotional consequences such as fear, fatalism, guilt, blame; perceived causes and effectiveness of lung cancer detection and treatment; the influence of smoking history on the formation of beliefs about lung cancer.

If it is OK with you, I'm going to ask you some questions about lung cancer. If you feel uncomfortable with any of my questions, please let me know and we can move on.

Potential prompts:

- Earlier you mentioned some of the symptoms that could be lung cancer. Can you think of any other symptoms that you think might be lung cancer?
- What else do you know about lung cancer?
- Can you tell me a little more about what you think about lung cancer as a disease?
  - Where do you think that feeling comes from?
  - What do you think other people's views are on lung cancer?
- What do you think causes lung cancer?
  - If yes and appropriate: How does that make you feel as a [past] smoker?
  - If appropriate: do you ever worry about lung cancer because you [used to] smoke?
  - How does that make you feel?
  - Is there anything in particular that makes you think your risk is high or low?
- How confident would you feel in recognising a symptom that could be lung cancer?
  - How does your [past] smoking affect your confidence in recognising a change in your body that could be lung cancer?
- What would you do if you had a symptom that you thought was lung cancer?

#### 4. Social influences

Explore influences of social networks on help seeking behavior and basis of cancer beliefs.

*Rationale:* to explore social norms, influences and stigma around help seeking; people who they know who have had lung cancer and the effects on beliefs and perceptions; how social networks might influence help-seeking

- If you had a symptom you thought might be lung cancer, would you tell anyone about it?
  - Who would you tell?
  - Why would you tell that person?
  - What do you think they would say to you if you told them about a symptom?
  - Would they encourage/discourage you to visit your doctor?
- Has anyone ever noticed a symptom of yours and suggest that you go to the doctor?
  - Probe: who/ what happened.
- We know that lung cancer isn't as common as other types of cancer like breast cancer. Do you know anyone who has ever been diagnosed with lung cancer?
- Can you tell me about the effects that [person] having lung cancer has had on you?
  - How has this affected your views about lung cancer?

#### 5. Closing questions

Final questions to end on a positive note

*Rationale:* to end the interview on a positive note

- If you were to offer anyone some advice on lung symptoms, what would it be?
- If the NHS were to make some changes to the services they offer to help people with lung symptoms get seen quicker, what would you suggest they change?
- Can you tell me about a positive experience of going to the doctor?

I know we've talked about a lot of things today, but would you like to tell me about anything else that we haven't talked about?

### Debrief

- Summarise the interview and address any questions or concerns.
- Check whether it is ok to contact them if there is anything that needs to be clarified after listening back to the conversation.
- Ensure that they know how to contact us for further help/information/to add further information
- Thank them for their time and give them the gift voucher.
- If the participant discloses symptoms during the interview suggest they seek medical help from their GP. Offer lung cancer leaflet and site specific helpline numbers.
- Have stop smoking service details available if they request it
- Offer to provide a summary of study findings

### Helpline numbers

#### Wales

- Tenovus Cancer Care support line on 0808 808 1010. The support line is open 8am-8pm, 7 days a week. Calls are free from a BT landline.

#### England and Scotland

- British Lung Foundation helpline on 03000 030555. This helpline is open 9am-5pm Monday to Friday. Calls cost the same as a local call.
- Roy Castle Lung Cancer Foundation helpline on 0333 323 7200. This helpline is open 9am-5pm Monday to Friday. Calls are free from a BT landline.

1  
2  
3 **Symptoms in the symptom task:**

4 **Coughing up blood**

5  
6  
7  
8 **A cough that doesn't go away**

9  
10  
11 **A long standing cough that gets worse**

12  
13  
14  
15  
16  
17 **Pain in your chest or shoulder**

18  
19  
20  
21  
22 **Persistent breathlessness**

23  
24  
25  
26  
27 **Persistent chest infections**

28  
29  
30  
31  
32 **Persistent tiredness or lack of energy**

33  
34  
35  
36  
37  
38 **Loss of appetite or unexplained weight  
39 loss**

40  
41  
42  
43  
44  
45  
46 **Ache or pain when breathing or  
coughing**

47  
48  
49  
50 **A hoarse voice**

51  
52  
53  
54  
55  
56  
57  
58 **Changes in the appearance of your  
fingers, such as becoming more curved  
or their ends becoming larger**



## **Glossary of terms**

### ***Coughing up blood***

If you notice that there is some blood coming up when you cough

### ***A cough that doesn't go away***

If you have a nagging cough that just doesn't seem to go away

### ***A long standing cough that gets worse***

You have had a cough for a long time but you think that it might have got worse

### ***Pain in your chest or shoulder***

A sharp or achy pain in either your chest or shoulder, or both

### ***Persistent breathlessness***

You feel like you can't catch your breath or become out of breath when doing tasks you used to be fine with

### ***Persistent chest infections***

If you have had a few chest infections in a row and they don't seem to be getting better or keep coming back

### ***Persistent tiredness or lack of energy***

If you have been feeling tired for a while or just feel like you don't have any energy

### ***Loss of appetite or unexplained weight loss***

If you have been losing weight without trying to and can't explain why or you just haven't been feeling up to eating the amount you normally would for a while

### ***Ache or pain when breathing or coughing***

If you have a sharp pain or achy feeling when you cough or breathe

### ***A hoarse voice***

A croaky or gravelly voice

### ***Changes in the appearance of your fingers, such as becoming more curved or their ends becoming larger***

If you notice that the ends of your fingers have changed shape

### ***Persistent definition***

Something that you notice you have had for a while and won't go away.

1  
2  
3  
4  
5  
6  
7  
8  
9  
10  
11  
12  
13  
14  
15  
16  
17  
18  
19  
20  
21  
22  
23  
24  
25  
26  
27  
28  
29  
30  
31  
32  
33  
34  
35  
36  
37  
38  
39  
40  
41  
42  
43  
44  
45  
46  
47  
48  
49  
50  
51  
52  
53  
54  
55  
56  
57  
58  
59  
60

First to go to the doctor

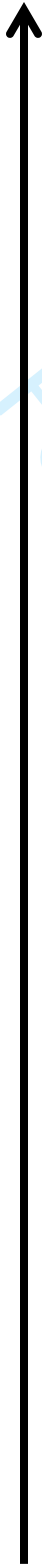

Last to go to the doctor

For peer review only

### Supplementary File 3: HPCP focus group topic guide

**Focus group aim:** To explore the needs and preferences from members of the public and local stakeholders (healthcare professionals/ community partners) for an intervention to support earlier lung cancer detection and diagnosis, targeted at high risk, harder to reach groups (over 40's, who are current/former smokers, living in areas of deprivation with serious lung comorbidity i.e. COPD).

#### Introduction

- Explain the aims of the focus group discussion. Emphasise that the focus group is not a test; we are interested in participants' preferences for an intervention for "lung health" to prompt earlier lung cancer symptom presentation, and how we could access people to take part in an intervention. All comments are welcomed: positive and negative.
  - 'We know that people who are high risk for lung cancer (people over the age of 40, living in deprived areas, who currently smoke or used to smoke and have a lung condition like COPD) are often diagnosed at a late stage, where treatment options are limited and a cure is less likely. This might be because they delay seeking medical advice with symptoms suggestive of lung cancer.  
We are considering if we should develop something that will give people who are high risk for lung cancer information about symptoms and when/ where they should go and seek medical help from.  
As healthcare professionals and people who work in deprived communities, we would like to know what you think about if we should do this. If you think this is a good idea, we would also like to know how best we can access this target group and invite them to take part in an intervention about lung health. Your ideas and suggestions are really valuable to us because of your wealth of experience, so all comments are welcomed (both positive and negative)'.
- Explain the voluntary nature of the study and that the focus group will be recorded with permission. If not already done, set up and switch on the recording equipment while participants sign the consent form.
- Before starting the focus group, remind participants about confidentiality and ask participants not to talk over each other. Go around the circle and ask participants to introduce themselves for the transcription.

**Rationale:** to explore whether the findings resonate with patients and members of the public in their local community

## Part1. Phase 1 interview findings

### Discussion of Phase 1 interview findings

Provide a short overview of key findings from Phase 1 interviews regarding barriers and enablers to lung cancer awareness and early symptom presentation in the target group. Ask the group to share their thoughts on the interview findings, and whether they resonate with them.

'We have been interviewing people across the UK who are high risk for lung cancer- people over the age of 40 who have a lung condition like COPD, who currently smoke or used to smoke and live in deprived areas. We wanted to understand how people think about symptoms of lung cancer, how and when people decide to go to the doctor with lung symptoms and the barriers to going to the doctor with these symptoms.

We found that people are completely fixated on detecting chest infections and look out for symptoms of a chest infection most days. They were really good at knowing when they had a chest infection and going to the doctor quickly to get antibiotics because they know it can be treated.

We also found that people tend to deny or ignore health problems that might affect them in the future, like lung cancer so may not go to the doctor with some serious symptoms. We think this is because they think that although lung cancer is inevitable, they also think that it cannot be cured so don't go and see the doctor

We want to develop something that can help people get these important symptoms of lung cancer seen to quicker by a medical professional, but we are not really sure how to do this. We would like to know what you think.'

- How can we do this?
- What do you think of these findings?
- To what extent do these findings resonate with you?

**Rationale:** to seek views on how to access the target group for an intervention and explore preferences for an intervention to support earlier presentation, including mode of delivery, target group, content and stop smoking information

### Preferences on intervention content

- What sorts of things do you think people would like to know / what skills would they like to learn?
  - What do you think would be most useful to people?
  - What information would be the highest priority/most important for them?
  - Should we avoid any information?
  - Do you think it is best to focus on symptoms or health beliefs?

### Preferences on intervention format

- How can we support people to seek medical help quickly with lung cancer symptoms? [what format]
  - Probe: a group one-off educational session to promote “lung health” in the local community; a leaflet/DVD; a lung health check; event in the community; posters in the local community
  - Do you think people want education or to learn ‘skills for health’?
    - What sort of skills do you think people would like to know?
- Who do you think would be best to lead or facilitate an intervention about lung health/ encourage people to seek medical help quickly with lung cancer symptoms?
  - Probe: patient representative, lay advisor, community partner, healthcare professional (GP, practice nurse, smoking cessation counsellor, respiratory nurse specialist...?)
- When would be best to support people to manage their lung health?
  - What do you think about using the point at which they are diagnosed with a lung condition as a ‘teachable moment’ to do an intervention about lung cancer?
  - What about during a regular check-up appointment with the nurse i.e. six monthly COPD clinic reviews?
- What do you think about a brief intervention with health care professionals in addition to a public facing intervention?
  - What would be useful to you as healthcare professionals?
- The intention is that this intervention would be implemented across the UK. How do you think everything we have talked about today might need to differ based on where someone lives (i.e. different countries) or the person in the intervention?
  - How could we incorporate an intervention into the different models of care across regions/countries?
- How do you think this intervention could fit with other current or planned health promotion activities?

### Accessing intervention participants

- Where could we approach our target group in an intervention about lung cancer/lung health?
  - Probe: through community pharmacies, primary care, community nurses, existing groups for people with lung conditions?
    - Probe: on utilising family / social networks to encourage participation of MoP?
  - Are you aware of any existing groups for people who fall into our target group?
    - What do you think about “piggybacking” onto these existing community groups or existing care plans with the nurse?
    - How do you think people would react to this?

### Smoking cessation

- ‘We know that people really don’t like it when the doctor tells them to stop smoking and some people felt like they were treated differently by the doctors because they smoked. Sometimes this put people off going to the doctor with lung symptoms. On the other hand some people feel that it is only fair to be told to stop smoking. When we design something about lung cancer, we don’t know if we should include something to help people to stop smoking or not.’
- What do you think about including stop smoking information in the intervention?
  - How do you think smokers might react to including stop-smoking information?
  - Can you think of ways we might be able to include stop-smoking information without putting smokers off?
  - What do you think about using signposting to stop smoking services instead of providing information about smoking cessation during the session?
- What do you think about using the intervention to cover things that are not related to lung health i.e. mental health or other factors that could be related to lung health?
  - How should we approach this?

### Debrief

‘Thank you for taking part in this study. We hope to use the findings from this focus group to develop an intervention based on the findings from the interviews and your recommendations to encourage earlier lung symptom presentation in those who are high risk for lung cancer. Anything you said will be treated as confidential. The voice-recording will be stored securely. Any quotes used in published research will not have your name or anything that could identify you. Do you have any questions? [answer any questions] Here are my contact details if you have any further questions.’

### Supplementary File 4: Members of the public focus group topic guide

**Focus group aim:** To explore the needs and preferences from members of the public and local stakeholders for an intervention to support earlier lung cancer detection and diagnosis. The intervention will be targeted at high risk, harder to reach groups (over 40's, who are current/former smokers, living in areas of deprivation with serious lung comorbidity i.e. COPD).

#### Introduction

- Explain the aims of the focus group. Emphasise that the focus group is not a test; we are interested in participants' preferences for an intervention for "lung health" to prompt earlier lung symptom presentation, and how we could access people to take part in an intervention. All comments are welcomed: positive and negative.
  - *'We know that some people sometimes might take a bit longer to go to the doctor with important lung symptoms. I am thinking about developing something that will highlight important lung symptoms, and encourage people to go to speak to someone who is medically trained about their symptoms. I would like to know what you think about best ways to do this. I would also like to know how you think we can find people for this. Your ideas and suggestions are really valuable to us, so all comments are welcomed (both positive and negative).'*
- Explain the voluntary nature of the study and that the focus group will be recorded with permission. If not already done, set up and switch on the recording equipment while participants sign the consent form.
- Before starting the focus group, remind participants about confidentiality and ask participants not to talk over each other. Go around the circle and ask participants to introduce themselves for the transcription.

**Rationale:** to explore whether the findings resonate with patients and members of the public in their local community

#### Discussion of Phase 1 interview findings

Provide a short overview of key findings from Phase 1 interviews regarding barriers and enablers to lung cancer awareness and early symptom presentation in the target group. Ask the group to share their thoughts on the interview findings, and whether they resonate with them.

*'We did some interviews across the UK with people who smoke or used to smoke and have a lung condition like COPD. We found that people look out for symptoms of a chest infection most days. They were really good at knowing when they had a chest infection and going to the doctor to get antibiotics. We also found that people try not to think about health problems that might affect them in the future, so may not go to the doctor with some symptoms that could be serious.*

People really didn't like it when the doctor told them to stop smoking and some people felt like they were treated differently by the doctors because they smoked. Sometimes this put people off going to the doctor with lung symptoms.

We also found that people often had a favourite doctor at their GP practice and would wait up to three weeks for an appointment even if they thought a symptom was important. People don't like

going to doctors that they don't know because they felt that they did listen as much as their favourite doctor. But sometimes it was necessary to go to a doctor they don't know to get an appointment the same day.

We want to develop something that can help people get important lung symptoms seen to quicker by a medical professional, but we are not really sure how to do this or who should do this. We would like to know what you think.'

- What do you think of these findings?
- In what ways do you feel the same as what we found?
- In what ways do you feel different to what we found?

**Rationale:** to seek views on how to access the target group for an intervention and explore preferences for an intervention to support earlier presentation, including mode of delivery, target group, content and stop smoking information

## **Part 2. Needs and preferences for an intervention**

### ***Preferences on intervention format***

- In what ways could we support people to manage their lung health?
  - Probe: a group one-off educational session to promote "lung health" in the local community; a leaflet/DVD; a lung health check; event in the community; posters in the local community
- Who do you think would be best to lead an intervention about lung health?
  - Probe: lung cancer survivor, lay advisor, community partner, healthcare professional
- If a health care professional was to lead the intervention, who would be best to lead a lung health intervention?
- Who is your favourite healthcare professional?
- When would be best to support people to manage their lung health?
  - What about when someone is diagnosed with a lung condition?
  - What about in one of your regular check-up appointments with the nurse i.e. six-monthly COPD clinic review?

### ***Preferences on intervention content***

- **What would you like to know? OR what skills would you like to learn?**
  - What would be most useful or important for you?
  - Can you think of anything that we should avoid or anything that is not as important?
- What do you think about including information to help people to stop smoking?
  - How would you react to stop-smoking information?
  - Can you think of ways we might be able to include stop-smoking information without putting smokers off?
  - What do you think about telling people where they can get help to stop smoking if they want to, instead of giving people information about stop smoking?



### **Accessing intervention participants**

- Where could we approach people who smoke/used to smoke and have lung symptoms?
  - Probe: through community pharmacies, primary care, community nurses, existing groups for people with lung conditions/ utilising family and social networks / snowballing approaches?
- Are you aware of any community groups for these types of people?
  - How do you think people from these groups would react to being approached for a lung health intervention?

### **Debrief**

'Thank you for taking part in this study. We hope to use the findings from this focus group to develop something to encourage people to go to the doctor with important lung symptoms. Anything you said will be treated as confidential. The voice-recording will be stored securely. Any quotes used in published research will not have your name or anything that could identify you. Do you have any questions? [*answer any questions*] Here are my contact details if you have any further questions.'

# BMJ Open

## Engaging high-risk groups in early lung cancer diagnosis: a qualitative study of symptom presentation and intervention preferences amongst the UK's most deprived communities

|                                 |                                                                                                                                                                                                                                                                                                                                                                                                                                                                                                                                                                                                                                                                                             |
|---------------------------------|---------------------------------------------------------------------------------------------------------------------------------------------------------------------------------------------------------------------------------------------------------------------------------------------------------------------------------------------------------------------------------------------------------------------------------------------------------------------------------------------------------------------------------------------------------------------------------------------------------------------------------------------------------------------------------------------|
| Journal:                        | <i>BMJ Open</i>                                                                                                                                                                                                                                                                                                                                                                                                                                                                                                                                                                                                                                                                             |
| Manuscript ID                   | bmjopen-2018-025902.R2                                                                                                                                                                                                                                                                                                                                                                                                                                                                                                                                                                                                                                                                      |
| Article Type:                   | Research                                                                                                                                                                                                                                                                                                                                                                                                                                                                                                                                                                                                                                                                                    |
| Date Submitted by the Author:   | 18-Jan-2019                                                                                                                                                                                                                                                                                                                                                                                                                                                                                                                                                                                                                                                                                 |
| Complete List of Authors:       | <p>McCutchan, GM; Cardiff University, Division of Population Medicine<br/> Hiscock, Julia; Bangor University, North Wales Centre for Primary Care Research<br/> Hood, Kerenza<br/> Murchie, Peter; University of Aberdeen, Division of Applied Health Science<br/> Neal, Richard; University of Leeds<br/> Newton, Gareth; Cardiff University, Division of Population Medicine, Patient and Public Involvement<br/> Thomas, Sara; Public Health Wales, Cwm Taf Public Health Team<br/> Thomas, Ann Maria; Cardiff University, Division of Population Medicine, Patient and Public Involvement<br/> Brain, Kate; Cardiff University, Division of Population Medicine, School of Medicine</p> |
| <b>Primary Subject Heading</b>: | Oncology                                                                                                                                                                                                                                                                                                                                                                                                                                                                                                                                                                                                                                                                                    |
| Secondary Subject Heading:      | Respiratory medicine, Qualitative research, Public health, Health policy, Smoking and tobacco                                                                                                                                                                                                                                                                                                                                                                                                                                                                                                                                                                                               |
| Keywords:                       | PRIMARY CARE, PUBLIC HEALTH, QUALITATIVE RESEARCH, RESPIRATORY MEDICINE (see Thoracic Medicine), lung cancer, socioeconomic status                                                                                                                                                                                                                                                                                                                                                                                                                                                                                                                                                          |
|                                 |                                                                                                                                                                                                                                                                                                                                                                                                                                                                                                                                                                                                                                                                                             |

SCHOLARONE™  
Manuscripts

1  
2  
3 1 **Title page**  
4  
5 2

6 3 **Title:** Engaging high-risk groups in early lung cancer diagnosis: a qualitative study of symptom  
7  
8 4 presentation and intervention preferences amongst the UK's most deprived communities  
9

10 5  
11 6 **Authors:** Dr Grace M McCutchan<sup>1§</sup>, Dr Julia Hiscock<sup>2</sup>, Prof Kerenza Hood<sup>3</sup>, Prof Peter Murchie<sup>4</sup>, Prof  
12 7 Richard D Neal<sup>5</sup>, Mr Gareth Newton<sup>1</sup>, Mrs Sara Thomas<sup>6</sup>, Mrs Ann-Maria Thomas<sup>1</sup>, Prof Kate Brain<sup>1</sup>  
13  
14 8

15 9  
16 9 **Affiliations:**

17 10 <sup>1</sup>Division of Population Medicine, School of Medicine, Cardiff University, Cardiff, UK

18 11 <sup>2</sup>North Wales Centre for Primary Care Research, Bangor University, Wrexham, UK

19 12 <sup>3</sup>Centre for Trials Research, School of Medicine, Cardiff University, Cardiff, UK

20 13 <sup>4</sup>Division of Applied Health Sciences, Section of Academic Primary Care, University of Aberdeen,  
21 14 Aberdeen, UK

22 15 <sup>5</sup>Leeds Institute of Health Sciences, Faculty of Medicine and Health, University of Leeds, Leeds, UK

23 16 <sup>6</sup>Cwm Taf Public Health Team, Public Health Wales, Keir Hardy University Health Park, Merthyr  
24 17 Tydfil, UK.  
25 18

26 19 **§Corresponding author:** Grace McCutchan. Postal address: Division of Population Medicine, Cardiff  
27 20 University, 1st Floor, Neuadd Meirionnydd, Heath Park, Cardiff, CF14 4YS. Email:  
28 21 mccutchanGM@cardiff.ac.uk. Telephone: +44 (0)2920 687639.  
29 22  
30 23  
31 24

32 25  
33 26  
34 27  
35 28  
36 29  
37 30  
38 31  
39 32  
40 24 **Word count: 5994**  
41 25  
42 26  
43 27  
44 28  
45 29  
46 30  
47 31  
48 32  
49 33  
50 34  
51 35  
52  
53  
54  
55  
56  
57  
58  
59  
60

## **Abstract**

### **Objectives**

People at high-risk for lung cancer - current/former smokers, aged 40+ years, with serious lung comorbidity (i.e. Chronic Obstructive Pulmonary Disease) and living in highly deprived areas - are more likely to delay symptom presentation. This qualitative study aimed to understand the influences on early presentation with lung cancer symptoms in high-risk individuals and intervention preferences.

### **Methods**

Semi-structured qualitative interviews with 37 high-risk individuals (without a cancer diagnosis), identified through seven GP practices in socioeconomically deprived areas of England, Scotland and Wales (most deprived 20%). A symptom attribution task was used to explore lung symptom perception and help-seeking, developed using Leventhal's Common Sense Model. Four focus groups with 18 high-risk individuals and 16 local stakeholders (healthcare professionals and community partners) were conducted to explore preferences for an intervention to promote early lung cancer symptom presentation. Data were synthesised using Framework analysis.

### **Results**

Individual and area level indicators of deprivation confirmed that interview participants were highly deprived.

**Interviews.** Preoccupation with managing 'treatable' short-term conditions (chest infections), led to avoidance of acting on 'inevitable and incurable' longer-term conditions (lung cancer). Feeling judged and unworthy of medical help because of their perceived social standing or lifestyle deterred medical help seeking, particularly when difficult life circumstances and traumatic events led to tobacco and alcohol addiction.

**Focus groups.** Participants recommended multi-faceted interventions in community venues, with information about lung cancer symptoms and the benefits of early diagnosis, led by a trained and non-judgemental facilitator.

## Conclusions

This study was novel in engaging a high-risk population to gain an in-depth understanding of the broader contextual influences on lung cancer symptom presentation. Perceived lack of health service entitlement and complex lives facilitated avoidance of recognising and presenting with lung cancer symptoms. Community-based interventions have the potential to empower disadvantaged populations to seek medical help for lung symptoms.

**Key words:** Lung cancer, deprived, qualitative, early diagnosis, medical help seeking, barriers.

## Strengths and limitations of the study

- This was the first study to use in-depth qualitative methods to explore how to engage high risk individuals from socioeconomically deprived areas in early lung cancer diagnosis.
- A major strength of this study was the proactive and rigorous sampling procedures used to ensure that our sample was at high risk for lung cancer.
- Assessment of individual and area level indicators of deprivation confirmed that interview participants were highly deprived; all participants resided in the 20% most deprived areas of the three UK nations, and most participants were unemployed/seeking benefits and/or rented social housing.
- To overcome the methodological limitations associated with studying anticipated or retrospectively recalled cancer symptom presentation, we recruited participants with no previous diagnosis of lung cancer and did not mention lung cancer in the interview study materials or during completion of the symptom attribution task.
- Opportunistic recruitment of focus group participants who may have been more favourably disposed to an intervention was a potential study limitation.

## 1 INTRODUCTION

2 Lung cancer is the leading cause of cancer mortality worldwide [1]. Outcomes are among the  
3 poorest for all cancers, with only 13% of lung cancer patients surviving five or more years in the UK  
4 [2]. Diagnosis of lung cancer at an early stage can enable curative surgical resection, meaning over  
5 80% of patients will survive one year or more when diagnosed at Stage I[3]. Delayed medical help  
6 seeking for symptoms and the high proportion of lung cancer diagnoses through emergency  
7 departments may partly explain why lung cancer is commonly diagnosed at an advanced, incurable  
8 stage[4]. Due to low specificity of lung cancer symptoms and similarity to other acute and comorbid  
9 respiratory conditions, patients face difficulty in knowing when to seek medical help[5,6].

10  
11 Multiple symptoms and risk factors for lung cancer including older age, smoking, the presence of a  
12 lung comorbidity and socioeconomic deprivation increase the likelihood that a patient presenting to  
13 their GP with symptoms indicative of lung cancer will receive a cancer diagnosis[7-9]. Lung cancer is  
14 more common and mortality higher in areas of high socioeconomic deprivation; it has been  
15 estimated that each year, socioeconomic inequalities account for 11,700 excess cases of lung cancer  
16 and 9,900 potentially avoidable lung cancer deaths in England[10]. High prevalence of smoking, lung  
17 comorbid conditions and asbestos exposure, all of which are well documented risk factors for lung  
18 cancer, contribute to high lung cancer incidence and mortality in deprived communities[11, 12].

19  
20 The presence of lung comorbidity such as chronic obstructive pulmonary disease (COPD) and history  
21 of smoking have been associated with a lower likelihood of presenting with lung cancer symptoms  
22 early[13,14]. In the lead up to lung cancer diagnosis, vague symptoms may go unnoticed or not  
23 considered a legitimate symptom to seek medical attention for, or be misattributed to smoking,  
24 aging or other comorbid conditions such as heart disease or COPD, thereby prolonging help  
25 seeking[5,13,15-26]. In addition, stigma attached to lung cancer[23,27-30] and fear of lung cancer  
26 diagnosis can deter medical help seeking for symptoms, particularly among smokers[23-25,29,31-  
27 33], leading to advanced stage disease at diagnosis[19]. To date, research has mainly been  
28 conducted with lung cancer patients from a range of socioeconomic groups with varying levels of  
29 lung cancer risk, retrospectively exploring the barriers to symptom presentation. Evidence is lacking  
30 about how individuals who are at high risk, and without a diagnosis of lung cancer, attribute  
31 potential lung cancer symptoms and decide to seek medical help.

32  
33 Strategies to prompt earlier help seeking for lung cancer symptoms are required. However, evidence  
34 is limited regarding optimal methods for promoting earlier presentation through interventions

1  
2  
3 1 targeted at high risk, highly deprived groups. Mass media[34] and community based social  
4  
5 2 marketing[35] lung cancer campaigns report limited reach to the most deprived groups. A nurse-led  
6  
7 3 primary care intervention for older adults with a long smoking history or recent cessation reported  
8  
9 4 increased and sustained intentions to seek help with lung cancer symptoms[36]. However, the  
10  
11 5 intervention was not targeted at highly deprived groups. Novel methods to support high risk groups  
12  
13 6 to engage in early lung cancer diagnosis are required.  
14  
15 7

15 8 The current study used a combination of interviews and focus groups to explore potential barriers to  
16  
17 9 early lung cancer diagnosis and strategies to encourage early help seeking with individuals who are  
18  
19 10 the high risk for lung cancer. Qualitative interviews were used to gain an in-depth understanding of  
20  
21 11 the processes and motivations involved in symptom attribution and medical help seeking for  
22  
23 12 potential lung cancer symptoms in high risk, highly deprived individuals. We targeted  
24  
25 13 socioeconomically deprived areas across three nations of the UK to approach potential participants,  
26  
27 14 and used rigorous sampling procedures to ensure that our sample were high risk for lung cancer. The  
28  
29 15 focus groups were conducted in highly deprived areas with stakeholders who lived or worked in  
30  
31 16 these communities. To our knowledge, this was the first study to explore the influences on early lung  
32  
33 17 cancer diagnosis and intervention preferences targeted at high risk groups living in the most  
34  
35 18 deprived areas of the UK.  
36  
37 19

## 35 20 **METHODS**

36  
37 21 The Consolidated Criteria for Reporting Qualitative Research (COREQ)[37] criteria were used to  
38  
39 22 guide reporting (Supplementary File 1). We used a combination of interviews and focus groups  
40  
41 23 because the interviews were framed around lung health (not lung cancer), whereas the focus groups  
42  
43 24 were framed around preferences for a lung cancer intervention. In addition, key interview findings  
44  
45 25 were presented in the focus groups for consolidation and to facilitate discussion about intervention  
46  
47 26 preferences.  
48  
49 27

### 48 28 **Participant recruitment and sampling**

49  
50 29 **Interviews.** Thirty-seven interview participants were recruited through seven primary care general  
51  
52 30 medical practices (GP) in South Wales (Cwm Taf: three practices), England (Liverpool: one practice)  
53  
54 31 and Scotland (Aberdeen: three practices). Using routinely published index of multiple deprivation  
55  
56 32 (IMD) data for England, Scotland and Wales, GP practices with the highest proportion of their  
57  
58 33 patients that reside in the most deprived quintile were contacted. Practice managers were asked to  
59  
60 34 screen GP practice databases purposively for eligible study participants: men and women over the

1 age of 40, who were current or former smokers, with a lung condition (COPD including chronic  
2 bronchitis and emphysema, interstitial lung disease or occupational lung disease). To overcome  
3 methodological limitations associated with retrospective recall, we recruited participants with no  
4 previous diagnosis of lung cancer. Participants were initially recruited from GP practices in Cwm Taf,  
5 where practice managers were asked to screen databases for current and former smokers, with no  
6 parameter set for number of years since quit attempt. Due to an initially high response rate from  
7 former smokers in Cwm Taf, subsequent participants in Aberdeen and Liverpool were sampled  
8 purposively according to smoking history. One GP practice in Aberdeen was asked to recruit current  
9 smokers and recent quitters (within ten years). Two GP practices in Aberdeen and one GP practice in  
10 Liverpool recruited current smokers only.

11  
12 To ensure that participants from highly deprived areas were invited to take part in the study,  
13 individual postcodes were screened by the research team. Eligible patients from the initial database  
14 screen were assigned a pseudo-anonymised participant identifier (PID). PID and postcode were  
15 checked against IMD score, and those that resided in the most deprived IMD quintile were eligible  
16 for the study. The final list of potentially eligible participants was checked by the GP for ability to  
17 provide informed consent, considered by the GP to be a risk to the interviewer or themselves and  
18 general health status (i.e. very seriously ill). Participants were excluded if they were diagnosed with  
19 lung cancer, were terminally ill or did not have capacity to consent.

20  
21 **Focus groups.** Eighteen participants for the focus groups with members of the public were recruited  
22 opportunistically through primary care or local community groups. Participant recruitment through  
23 primary care employed the same methods as those used to invite the interview participants.  
24 Pseudonymised participant identifiers were checked to ensure that those who took part in the focus  
25 groups had not already participated in the interviews. Additional participants were recruited  
26 opportunistically through local community respiratory support groups and non-health related groups  
27 in the local community centre. Local community group organisers in areas of high deprivation were  
28 contacted and asked for help to recruit members of the public in our target group. Local health  
29 service planning groups and health board staff facilitated recruitment of 12 participants for the  
30 healthcare professional and community partner (HPCP) focus groups.



## 1           2           3           4           5           6           7           8           9           10           11           12           13           14           15           16           17           18           19           20           21           22           23           24           25           26           27           28           29           30           31           32           33           34           35           36           37           38           39           40           41           42           43           44           45           46           47           48           49           50           51           52           53           54           55           56           57           58           59           60

### 1           2           3           4           5           6           7           8           9           10           11           12           13           14           15           16           17           18           19           20           21           22           23           24           25           26           27           28           29           30           31           32           33           34

Written consent and permission to audio-record were obtained on the day of the interviews and focus groups.

**Interviews.** Eligible participants were invited by letter with more detailed study information attached, with a reminder at two weeks to non-respondents. Those who returned the study reply slip via a FREEPOST envelope were contacted by the interviewer (GM or JH) to arrange a suitable time and date for the interview, to outline the study and answer any questions.

Interviews were conducted using a semi-structured topic guide to facilitate a discussion about illness perceptions and coping strategies; development was guided by the Common Sense Model[38] (Supplementary File 2). The interview was framed the interview around lung health, rather than lung cancer. The interview aimed to explore experiences of their lung condition, symptom attribution, symptom experience and help seeking behaviour, the influence of smoking history on new or changing symptoms, and if appropriate, lung cancer awareness and beliefs.

A symptom sorting task was used to provide participants with a concrete visual task to increase engagement with the interview in the context of potential low literacy. The task formed a basis for discussion about symptom attribution and experience, where participants were asked to order 11 symptoms from those they would go to the doctor with first, through to the last. The 11 symptoms were selected from the NICE guidance for referral of suspected lung cancer (<https://www.nice.org.uk/guidance/cg121>). The symptoms were re-worded to simplify the language in line with wording found on the NHS Choices website for lung cancer symptoms and any reference to time scale of symptoms was removed (Supplementary File 2, p.9). For example, a cough that lasts for 3 weeks or more was amended to 'persistent cough', and haemoptysis was amended to 'coughing up blood'. The presentation order of the symptoms was rotated between interviews.

To explore potential lung cancer symptom attribution outside of a cancer context, there was no mention of cancer in the interview study information packs or when participants completed the symptom sorting task. If appropriate, participants were asked questions to explore lung cancer awareness and beliefs at the end of the interview or when participants discussed lung cancer unprompted.

1 Demographic data were collected using a short questionnaire, including three additional measures  
2 of socioeconomic group: age, gender, smoking status (quantity and duration), home ownership,  
3 occupation and educational attainment. Interviews were conducted until data saturation (no new  
4 themes emerging[39]).

5  
6 **Focus groups.** High risk members of the public, and healthcare professionals (i.e. GP, nurse,  
7 community pharmacist/community partners working in areas of deprivation with people with  
8 smoking history and/or lung conditions were sent information about the study and invited to take  
9 part in focus groups. Focus group participants were explicitly informed that the study was about the  
10 development of an intervention about lung cancer. A mutually convenient time, date and location  
11 for the focus groups was agreed. The focus groups were conducted using a semi-structured topic  
12 guide to explore preferences for an intervention to promote earlier lung cancer diagnosis. Separate  
13 topic guides were used for the public and professional groups (Supplementary file 3 and 4).  
14 Participants were given a verbal summary of the key findings from the qualitative interviews, and  
15 asked to discuss preferences for a potential lung cancer intervention targeted at high risk, highly  
16 deprived individuals. Topics for discussion were: preferred format of an intervention,  
17 recommendations for intervention content, preferred location and facilitator for intervention  
18 delivery, and recommendations for the inclusion of smoking cessation advice.

### 19 20 **Setting**

21 Most interviews (n=34) took place face-to-face in participant's own homes, with three taking place in  
22 a café, local community centre or over the telephone, and lasted between 46 and 146 minutes  
23 (mean 83 minutes). Family members were present for three interviews but did not participate in the  
24 study. Focus groups took place in primary care settings (n=2) or local community centres (n=2).  
25 Members of the public who took part in the interviews or focus groups were compensated with a  
26 £10 shopping. Healthcare professionals and community partners were not reimbursed for their time.

27  
28 Interviews and focus groups in England were conducted by JH (PhD), a trained and experienced  
29 female qualitative Research Fellow and Medical Sociologist. The Welsh and Scottish interviews and  
30 focus groups were conducted by GM (PhD), a female Health Psychologist and trained qualitative  
31 Research Associate.

## 1 **Data analysis**

2 Interviews and focus groups were audio-recorded and transcribed verbatim. Anonymised transcripts  
3 were analysed in detail using the Framework method[40]. Framework analysis is a well-respected  
4 and commonly used approach to qualitative data analysis. It was considered particularly suitable for  
5 this study due to its transparency and the team work involved[41]. Framework enabled the sharing  
6 of synthesised data charts among team members to facilitate participation in analysis and  
7 interpretation workshops.

8 The data were analysed in five stages: familiarisation, identification of a thematic framework,  
9 indexing, charting, and interpretation. A separate index was created on Microsoft Excel for the  
10 interview and focus group data; however, wherever possible, overlap was coded using the same  
11 indexing terms, for example 'barriers to symptom presentation' was commonly discussed in both the  
12 interview and focus groups. The index was developed by two researchers (GM and JH). Themes were  
13 generated independently and consolidated through discussion in nine interpretation workshops over  
14 a nine month period by GM and JH. The different perspectives of the researchers as noted above  
15 was a benefit during analysis and interpretation. Field notes were recorded for each interview and  
16 focus group, and incorporated into discussion during the analysis workshops. Although not formally  
17 incorporated into the analysis plan, the positioning of each symptom in the attribution task was  
18 considered during interpretive workshops. Interpretive themes were generated by JH and GM, and  
19 developed with all authors in monthly management meetings. Transcripts and study findings were  
20 not checked by participants; however, all participants were mailed a summary of the study findings.

## 21 **Ethical approval**

22 The study received ethical approval from Southampton Central- Hampshire A Research Ethics  
23 Committee (16/SC/0589).

24  
25  
26 **Patient and public involvement.** Patient and public representatives (AMT and GN) were involved in  
27 the design of the study and interpretation of study findings in monthly management group  
28 meetings. All study materials and topic guides were developed with lay input (AMT and GN) and  
29 written to a reading age of 10 years due to potentially low literacy. Reading age was calculated using  
30 the Automated Readability Index ([www.readabilityformulas.com](http://www.readabilityformulas.com)).

## RESULTS

### Interviews

Of the 397 invited to take part in the study, 78 people returned the study reply slip and declined to participate in the study; reasons for refusal were unknown. Thirty-seven participants agreed to take part in the study. The majority of the sample were female, current smokers, and with a mean age of 65 years (Table 1). Most had a diagnosis of COPD. All 37 participants resided in the lowest quintile of deprivation for their respective country, of whom 15 were in the most deprived decile. Most participants had left school before age 15 with no formal qualifications, lived in social housing, and claimed disability benefit or job seekers allowance.

**Table 1. Qualitative interview sample characteristics**

| Sample characteristics                               | Total n=37   |
|------------------------------------------------------|--------------|
| <b>Gender</b>                                        |              |
| Male                                                 | 16           |
| Female                                               | 21           |
| <b>Age, years</b>                                    |              |
| Mean (range)                                         | 64.7 (48-84) |
| <b>Smoking status</b>                                |              |
| Current smoker                                       | 18           |
| Occasional smoker                                    | 3            |
| Former smoker, recent quitter (within five years)    | 5            |
| Former smoker (quit over five years ago)             | 11           |
| <b>Deprivation decile</b>                            |              |
| <b>Welsh Index of Multiple Deprivation (WIMD)</b>    |              |
| Decile 1 (most deprived 10%)                         | 5            |
| Decile 2 (most deprived 11-20%)                      | 10           |
| <b>Scottish Index of Multiple Deprivation (SIMD)</b> |              |
| Decile 1 (most deprived 10%)                         | 4            |
| Decile 2 (most deprived 11-20%)                      | 12           |
| <b>English Index of Multiple Deprivation (IMD)</b>   |              |
| Decile 1 (most deprived 10%)                         | 6            |
| <b>Self-reported lung condition</b>                  |              |
| COPD                                                 | 26           |
| Chronic bronchitis                                   | 2            |
| Chronic emphysema                                    | 2            |
| Occupational lung disease                            | 1            |
| Unsure of diagnosis                                  | 4            |
| Missing                                              | 2            |
| <b>Educational attainment</b>                        |              |
| Left school at/before age 15                         | 29           |
| Completed CSEs, O-Levels or equivalent               | 5            |
| Completed A levels or equivalent                     | 1            |
| Completed further education but not degree           | 1            |

|                                               |    |
|-----------------------------------------------|----|
| Missing                                       | 1  |
| <b>Employment</b>                             |    |
| Employed full-time                            | 2  |
| Employed part-time                            | 1  |
| Casual work                                   | 1  |
| Job seekers or disability benefit             | 17 |
| Retired                                       | 16 |
| <b>Home/living arrangement</b>                |    |
| Own flat/house                                | 14 |
| Rent from local authority/housing association | 21 |
| Rent privately                                | 1  |
| Missing                                       | 1  |

Key themes were: strategies involved in symptom detection and help seeking behaviour, maintaining short term health, avoidance of acting on longer term health, the desire to be a model patient, and the importance of the relationship with their healthcare professional. See Table 2 for illustrative quotes.

### ***Symptom detection strategies and help seeking***

Symptoms discussed during the task were viewed as “part and parcel” (male, 68, England, current smoker) of their lung condition, other pre-existing comorbidities or smoking habit, and were consequently normalised and perceived not to require medical help. Changes to vague or respiratory-type lung cancer symptoms were only taken seriously when remarked on by friends and family or when they impacted on daily life.

Symptoms that could indicate a chest infection were reportedly constantly monitored. Participants discussed using sophisticated strategies such as noticing changes in the colour and consistency of their phlegm or subtle audible changes in their cough to actively detect chest infections. Such strategies were considered important to facilitate early detection and treatment for chest infections through their primary care provider or with rescue packs (emergency packs of steroids and antibiotics that can be kept at home), due to lung condition.

Constant monitoring of phlegm for control of lung condition meant that participants could and would notice haemoptysis, but few reported actively looking for haemoptysis on a regular basis. Disparity between actual and anticipated medical help seeking was reported for haemoptysis. Most participants had not previously experienced haemoptysis, but would anticipate seeking medical help immediately due to the potentially serious nature of blood. However, some participants who had

1 previously or were currently experiencing haemoptysis attributed the presence of blood to non-  
2 cancer causes such as their stomach ulcer or a previous flu jab. One participant ascribed the blood in  
3 their cough to lung cancer. Some of the participants with experience of haemoptysis did not seek  
4 medical help.

### 5 6 ***Focus on maintaining short term health***

7  
8 Participants reported seeking medical help quickly when symptoms were easy to detect, were  
9 attributed to what was perceived as a treatable cause and represented an immediate health threat  
10 i.e. a chest infection due to lung condition. Participants could often request an appointment the  
11 same day as permitted by their GP surgery policies. Prompt help seeking was reportedly due to fear  
12 of not being able to breathe and the potentially life-threatening nature of chest infections, and is  
13 likely to reflect the need to maintain good health in the short term.

14  
15 The focus on maintaining short term health may reflect low general expectations of health, where  
16 some participants disclosed surprise at living beyond 60 years of age. In addition, due to fear of  
17 potentially hearing bad news, some participants expressed a preference to not ask questions during  
18 a consultation or yearly review with the nurse. Participants discussed prioritising day-by-day living  
19 over longer term planning, thereby focusing on health in the short term.

### 20 21 ***Avoidance of acting on longer term health***

22  
23 Most participants discussed scepticism about the link between lung cancer and smoking. Conversely,  
24 participants thought that lung cancer was inevitable due to their current or former lifestyle,  
25 including smoking history, working conditions, their lung condition and the reported incidence of  
26 lung cancer in their community. For many participants, the topic of lung cancer arose spontaneously.  
27 Lung cancer was discussed in the context of perceived inevitability when reflecting on their general  
28 lung health and during completion of the symptom task when recalling friends/family with lung  
29 cancer. Beliefs about inevitability were often coupled with highly negative fearful and fatalistic  
30 beliefs about lung cancer, with no cure and eventual death. Such claims were evidenced by knowing  
31 a high proportion of friends and family who were diagnosed with lung cancer and often died. A few  
32 participants discussed that a cure for lung cancer involved luck or was 'some miracle' (male, 56,  
33 Wales, occasional smoker), reflecting a perceived lack of control over early diagnosis and treatment.  
34 Consequently, actual or anticipated medical help seeking for lung cancer symptoms was motivated

1  
2  
3 1 by pain, or to seek a diagnosis and prognosis to notify family members. However, some participants  
4  
5 2 anticipated refusal of treatment or would even contemplate suicide.  
6  
7 3

8 4 We found differences in how participants with and without dependent family reported responding  
9  
10 5 to symptoms of lung cancer. Female participants with dependent children or grandchildren  
11  
12 6 discussed a motivation to visit the doctor with symptoms suggestive of lung cancer, in order to  
13  
14 7 receive a prognosis to enable childcare arrangements after death. Women with dependent children  
15  
16 8 who held more positive beliefs about lung cancer treatment reported the need to seek help for  
17  
18 9 treatment to 'stay healthy' and prolong life. Participants with no dependent family were more likely  
19  
20 10 to ignore lung cancer symptoms, or anticipate seeking medical help if in pain but refuse treatment.  
21  
22 11

### 22 12 ***The model patient***

23  
24  
25 14 Participants discussed a sense of lack of entitlement to health services due to smoking habit, where  
26  
27 15 respiratory-type symptoms of lung cancer were perceived as self-inflicted. For some, this was  
28  
29 16 reinforced by an actual or expected 'smoking lecture' each time they sought help from healthcare  
30  
31 17 professionals; the lecture made participants feel ostracised, particularly when smoking was used as a  
32  
33 18 coping mechanism and contributed to not feeling worthy of seeking medical help. Some participants  
34  
35 19 perceived that they may be treated differently by health professionals because they live in an area of  
36  
37 20 deprivation, and discussed a potential power imbalance during consultations.  
38  
39 21

40 22 Conversely, participants reported high criticism towards people who were perceived to waste,  
41  
42 23 exploit and overuse NHS resources. They cited drug addicts, illegitimate benefits claimers, older  
43  
44 24 people wanting social interaction, and people with coughs and colds as over users of the health  
45  
46 25 service. Such beliefs may reflect a downward comparison to other more stigmatised service users to  
47  
48 26 legitimise their own help seeking. In order to be considered a model and non-problem patient,  
49  
50 27 participants discussed legitimising their own help seeking by only consulting when absolutely  
51  
52 28 necessary - and often after trying their 'own cures' i.e. cough medicine from the pharmacist - to not  
53  
54 29 burden the doctors. Infrequent attenders or 'good service users' discussed feeling a sense of  
55  
56 30 superiority for being a model patient.  
57  
58 31  
59 32  
60 33  
61 34

## 1 **Relationship with the healthcare professional**

2  
3  
4  
5  
6  
7  
8  
9  
10  
11  
12  
13  
14  
15  
16  
17  
18  
19  
20  
21  
22  
23  
24  
25  
26  
27  
28  
29  
30  
31  
32  
33  
34  
35  
36  
37  
38  
39  
40  
41  
42  
43  
44  
45  
46  
47  
48  
49  
50  
51  
52  
53  
54  
55  
56  
57  
58  
59  
60

1  
2  
3  
4  
5  
6  
7  
8  
9  
10  
11  
12  
13  
14  
15  
16  
17  
18  
19  
20  
21  
22  
23  
24  
25  
26  
27  
28  
29  
30  
31  
32  
33  
34  
35  
36  
37  
38  
39  
40  
41  
42  
43  
44  
45  
46  
47  
48  
49  
50  
51  
52  
53  
54  
55  
56  
57  
58  
59  
60

Some participants disclosed traumatic events in their lives including physical and sexual abuse, leading to tobacco dependence and alcohol addiction. In addition, more than half of the sample described symptoms of depression and anxiety. Therefore, the reported relationship with their healthcare professional was important when considering whether to present with lung symptoms. Participants discussed the need to feel understood and not judged by their healthcare professional, with their personal history taken into account in the context of health behaviour such as smoking.

Those who discussed feeling comfortable, safe and not judged by their chosen healthcare professional felt encouraged to present with symptoms. Some participants reported that they were prepared to wait up to three weeks for an appointment with their preferred healthcare professional to discuss worrisome and potentially serious symptoms that could indicate lung cancer. Many participants reported problems with maintaining continuity of care, highlighting problems with the stretched National Health Service.

**Table 2. Illustrative quotes (qualitative interviews)**

| Theme                                                                                      | Quote                                                                                                                                                                                                                                                                                                                                                                                                                                                                                                                                                                                |
|--------------------------------------------------------------------------------------------|--------------------------------------------------------------------------------------------------------------------------------------------------------------------------------------------------------------------------------------------------------------------------------------------------------------------------------------------------------------------------------------------------------------------------------------------------------------------------------------------------------------------------------------------------------------------------------------|
| <b>Symptom detection strategies and help seeking</b><br>Friends and family notice symptoms | <i>"My daughter might [notice changes to symptoms] cos she mentions it now and then...she'll give me a dig and she'll say 'your breathing's annoying me'. Cos it's heavy breathing so. Then again there's something wrong"</i> (Male, 48, Scotland, former smoker)                                                                                                                                                                                                                                                                                                                   |
| Sophisticated symptom detection strategies/ monitoring of chest infections                 | <i>"If [phlegm is] white and bubbly it's not a chest infection. It's only when it goes green so you can tell yourself exactly how close you are to getting an infection... There's just two different kinds of green spittle, if it's fluorescent green then you've got an infection, normal antibiotics won't work with me, if it's the lighter green I'm fine with that one... it's handy to look out for, because you can get the right medication at the right time...because if anything happens to me, there's no one for my kids."</i> (Female, 48, Scotland, current smoker) |
| Normalisation of haemoptysis                                                               | <i>"Coughing up blood, I do actually get some of that I don't know why, but it could be because of the ulcer thing and that...There again then well I do get like nosebleeds, and then I'm thinking the blood maybe coming inside and coming down, you swallow it see. So then that will come back up won't it"</i> (Male, 62, Wales, former smoker)                                                                                                                                                                                                                                 |



|                                                                                                                                                                                                                                                                                                                                                                                                 |                                                                                                                                                                                                                                                                                                                                                                                                                                                                                                                                                                                                                                                                                                                                                                                                                                                                                                                                                                                                                                                                                                                                                                                                                                                                                                                                                                                                                                                                                                                                                                                                                                                                                                                                                                                                                                                                                                                                                                                                                                                                                                                                                                                                                                                                                            |
|-------------------------------------------------------------------------------------------------------------------------------------------------------------------------------------------------------------------------------------------------------------------------------------------------------------------------------------------------------------------------------------------------|--------------------------------------------------------------------------------------------------------------------------------------------------------------------------------------------------------------------------------------------------------------------------------------------------------------------------------------------------------------------------------------------------------------------------------------------------------------------------------------------------------------------------------------------------------------------------------------------------------------------------------------------------------------------------------------------------------------------------------------------------------------------------------------------------------------------------------------------------------------------------------------------------------------------------------------------------------------------------------------------------------------------------------------------------------------------------------------------------------------------------------------------------------------------------------------------------------------------------------------------------------------------------------------------------------------------------------------------------------------------------------------------------------------------------------------------------------------------------------------------------------------------------------------------------------------------------------------------------------------------------------------------------------------------------------------------------------------------------------------------------------------------------------------------------------------------------------------------------------------------------------------------------------------------------------------------------------------------------------------------------------------------------------------------------------------------------------------------------------------------------------------------------------------------------------------------------------------------------------------------------------------------------------------------|
| <p><b>Focus on maintaining health in the short term</b></p> <p>Fear of bad news during a consultation</p>                                                                                                                                                                                                                                                                                       | <p><i>"I get worried about having chest infection, I get more worried about today or tomorrow rather than the future. The future that's going ahead for us anyway. Lung cancer's not an issue really"</i> (male, 50, Scotland, former smoker)</p> <p><i>"I'm very poor in asking questions cos I don't want to know the results. Simple as that...no I don't ask when they say the oxygen [saturation] is alright I just think well it's alright and it's one thing less I haven't got to worry about"</i> (Female, 69, Wales, former smoker)</p>                                                                                                                                                                                                                                                                                                                                                                                                                                                                                                                                                                                                                                                                                                                                                                                                                                                                                                                                                                                                                                                                                                                                                                                                                                                                                                                                                                                                                                                                                                                                                                                                                                                                                                                                          |
| <p><b>Avoidance of long term health outcomes</b></p> <p>Scepticism about the link between smoking and lung cancer</p> <p>Perceived inevitability of lung cancer/ anticipate suicide</p> <p>Avoidance of lung cancer due to social and contextual factors</p> <p>Lung cancer fatalism/ anticipated refusal of treatment</p> <p>Response to lung cancer symptom/ female with dependent family</p> | <p><i>"You hear occasions where people who don't smoke, who've never smoked. Well how do they get their lung cancer?...I've got [lung cancer] in my head, I'm probably going to get it, if I haven't already got it because of the lifestyle I've had. Where I've worked and everything else, what I've worked with."</i> (Male, 68, England, current smoker)</p> <p><i>"[Lung cancer] is really, really on the forefront on the mind...I just think 'oh god, please don't let me get cancer'...I think if I was to get cancer, I've sometimes said to myself, I'd commit suicide. I would take a pill or something."</i> (Female, 81, Scotland, current smoker)</p> <p><i>"[Lung cancer] worries me but I've got proper problems to worry about [carer for disabled son, problems with social services and benefits claims, insecurity of current council owned housing and problems with area of residence with 'junkies']. I won't worry about it until it's actually here. If I started worrying about eventualities I'd never get anywhere"</i> (Female, 48, Scotland, current smoker)</p> <p><i>"Until anything happened and I'm actually told that I've got [lung cancer], there's nothing I can do about it. I'm really a believer of what's in your cards is already written. So I don't look at anything like that...But if they told me it was cancer, I would go ok then, but I wouldn't take any of the treatments... if it's my time, it's my time. It just doesn't, I don't think I've got any more fight in me for all that. I think that would be the last straw for me. So I just live every day as it comes now, I don't really plan much. So I'm just living in the day, you know. Cos whatever happens, happens anyway."</i> (Female, 49, Scotland, current smoker)</p> <p><i>"I don't think they can treat [lung cancer]. You've just got to accept it haven't you...I would go to the doctor [with a symptom], I think I would like to know how long I had. Not for me but for [my son] you know. For him...If it was just me I wouldn't want to know, but because I've got him, [I would] definitely...When I seen the blood I did think to myself, I flushed it away right away...I seen the blood and I thought no, and I thought I've got to, you know,</i></p> |

|                                                            |                                                                                                                                                                                                                                                                                                                         |
|------------------------------------------------------------|-------------------------------------------------------------------------------------------------------------------------------------------------------------------------------------------------------------------------------------------------------------------------------------------------------------------------|
|                                                            | <i>because of [my son]. The only way I would want to know is because of him. If I was by myself I would just say, don't want to know...Can't just think about myself I've got to think about him as well."</i> (Female, 68, Scotland, current smoker)                                                                   |
| <b>The model patient</b>                                   |                                                                                                                                                                                                                                                                                                                         |
| Perception of healthcare professionals attitude to smokers | <i>"You feel as though you're an alien because you smoke, you feel as so they just look at you and say 'urghh', you know"</i> (Female, 52, Scotland, current smoker)                                                                                                                                                    |
| Critical of people who waste NHS resources                 | <i>"I can guarantee if I went this Monday and go next Monday the same people are sitting there. I'm being honest, they're a drain on society on the NHS, but that's the way they live...these people that go there are not really ill, I think they're just seeking attention"</i> (Male, 78, England, current smoker). |
| <b>Relationship with healthcare professional</b>           |                                                                                                                                                                                                                                                                                                                         |
| Disclosure of highly sensitive personal problem            | <i>"Some people are friendly and not stony faced...if [the HCP] can't even start a conversation with the simplest of ice breakers then how can people tell about pooping themselves when they're coughing up"</i> (Female, 48, Scotland, current smoker)                                                                |
| Good relationship with GP                                  | <i>"I'm alright with [one GP], you could tell her anything, I've shocked her sometimes"</i> (Female, 51, England, current smoker)                                                                                                                                                                                       |

**Focus groups**

Two public focus groups were conducted in Wales and England. Most participants were female and former smokers, and all participants were diagnosed with a lung condition. Two professional focus groups were conducted in Wales. Most participants were female, and were medical professionals (Table 3).

**Table 3. Focus group characteristics**

| Members of the public                               | N participants   | Healthcare professionals and community partners | N participants   |
|-----------------------------------------------------|------------------|-------------------------------------------------|------------------|
| <b>Group 1, England</b>                             | <b>total n=7</b> | <b>Group 3, Wales</b>                           | <b>total n=5</b> |
| <i>Gender</i>                                       |                  | <i>Gender</i>                                   |                  |
| Female                                              | 6                | Female                                          | 2                |
| Male                                                | 1                | Male                                            | 3                |
| <i>Smoking status</i>                               |                  | <i>Occupation</i>                               |                  |
| Current smoker                                      | 3                | Community nurse                                 | 1                |
| Former smoker                                       | 3                | Support group facilitator                       | 1                |
| Never smoker                                        | 1                | Community partner                               | 1                |
| <i>Self-reported lung condition</i>                 |                  | Third sector representative                     | 1                |
| COPD                                                | 7                | Public health representative                    | 1                |
| Recruited through Primary Care and community groups |                  | Recruited through the Health Board              |                  |

| <b>Group 2, Wales</b>               | <b>total n=9</b> | <b>Group 4, Wales</b>                            | <b>total n=7</b> |
|-------------------------------------|------------------|--------------------------------------------------|------------------|
| <i>Gender</i>                       |                  | <i>Gender</i>                                    |                  |
| Female                              | 5                | Female                                           | 6                |
| Male                                | 4                | Male                                             | 1                |
| <i>Smoking status</i>               |                  | <i>Occupation</i>                                |                  |
| Current smoker                      | 3                | Practice manager                                 | 1                |
| Former smoker                       | 4                | Pharmacist                                       | 1                |
| Never smoker                        | 2                | GP                                               | 2                |
| <i>Self-reported lung condition</i> |                  | Practice nurse                                   | 2                |
| COPD                                | 9                | Medical student                                  | 1                |
| Recruited through community groups  |                  | Recruited through the Health Board/ Primary Care |                  |

Key themes discussed were: barriers to early lung cancer diagnosis, and preferences regarding the format and content of an intervention for the early detection of lung cancer. See Table 4 for illustrative quotes.

### **Barriers to lung cancer symptom presentation**

The public and stakeholder focus groups confirmed our interview findings, where fear of wasting the doctor's time with trivial symptoms and fear of being judged or lectured about smoking was perceived to deter medical help seeking for potential lung cancer symptoms. In addition, the health professional group supported our findings that patients with lung conditions tend to be preoccupied by chest infections. However, we found potential disparity between the patient-reported experience of the GP's approach to smoking and the healthcare professional reported approach to smoking cessation. Healthcare professionals in Wales discussed new guidance that discourages health professionals from 'lecturing' patients, suggesting the patient reported experience may be based on previous healthcare interactions, and they consequently anticipate a lecture. Alternatively, healthcare professionals may be unaware of new guidance, or not adhere to new guidance and consequently continue to 'lecture' patients about smoking.

### **Potential format of an intervention to support earlier lung cancer diagnosis**

All groups discussed a preference for community based interventions, away from a traditional healthcare setting, for example a community event, talk in a community venue or health check bus, similar to breast screening mobile units. The anonymous and relaxed nature of such an intervention meant that intervention participants would feel they were not wasting GP time; rather it would act as a signal that their attendance at the event was desired. Participants compared this to a visit to the

1 doctor, where they discussed a feeling of wasting the GP's time because they were not invited to  
 2 attend. It was considered important that the intervention facilitator was knowledgeable or trained,  
 3 non-judgemental, easy to talk to and approachable, highlighting the importance of relational aspects  
 4 of a lung cancer intervention. Participants suggested a nurse, pharmacist, trained patient  
 5 representative or community worker.

### 6 **Intervention content**

7  
 8  
 9 The public groups requested more information about the symptoms of lung cancer. However, the  
 10 healthcare professional groups felt that current lung cancer symptom information was too broad,  
 11 leading to dismissal and potential avoidance of lung cancer information because people with  
 12 smoking history or comorbid lung conditions experience most of the symptoms daily. To overcome  
 13 this problem, the healthcare professionals groups discussed the need for more specific symptom  
 14 information, emphasising changes to normal symptoms and coupled with information about risk  
 15 factors for lung cancer.

16  
 17 To modify negative beliefs about lung cancer, the health professionals groups suggested using  
 18 positive stories to communicate messages about the importance of lung cancer early diagnosis and  
 19 highlight the potential for survival outcomes with early stage detection.

20  
 21 The inclusion of smoking cessation information in a lung cancer intervention was considered  
 22 important by all groups. However, the manner in which smoking cessation could be approached was  
 23 discussed as key to effective promotion of smoking cessation. Participants suggested highlighting the  
 24 benefits of stopping smoking in a gentle and relaxed manner to encourage choice to quit.

25 **Table 4. Illustrative quotes (focus groups)**

| Theme                                                                                 | Quote                                                                                                                                                                                                                                                                                                                                                                                                                          |
|---------------------------------------------------------------------------------------|--------------------------------------------------------------------------------------------------------------------------------------------------------------------------------------------------------------------------------------------------------------------------------------------------------------------------------------------------------------------------------------------------------------------------------|
| <b>Barriers to lung cancer symptom presentation</b>                                   |                                                                                                                                                                                                                                                                                                                                                                                                                                |
| Fixation on chest infections                                                          | <i>"People tend to be fixated on a [chest] infection and they want their next rescue pack ready cos almost as if it's inevitable; it's going to happen in the next month or so." (Focus group 4)</i>                                                                                                                                                                                                                           |
| Difference in perception around healthcare professional approach to patients' smoking | <i>"I think there is a gulf between what people believe their GP would say to them if they do actually talk about [smoking] as opposed to what that conversation actually is in reality....But certainly as far as the formal training coming out of public health, if they are doing that then there is, that's not a lecture...But that's what people fear is going to be what they're going to be told" (Focus group 3)</i> |

|                                                                                                                                            |                                                                                                                                                                                                                                                                                                                                                                                                                                                                                                                                                                                                                                                                                                                                                                                                                                                                                                                                                                                                                                                                                                                                                                                                             |
|--------------------------------------------------------------------------------------------------------------------------------------------|-------------------------------------------------------------------------------------------------------------------------------------------------------------------------------------------------------------------------------------------------------------------------------------------------------------------------------------------------------------------------------------------------------------------------------------------------------------------------------------------------------------------------------------------------------------------------------------------------------------------------------------------------------------------------------------------------------------------------------------------------------------------------------------------------------------------------------------------------------------------------------------------------------------------------------------------------------------------------------------------------------------------------------------------------------------------------------------------------------------------------------------------------------------------------------------------------------------|
| <p><b>Potential format of an intervention to support earlier lung cancer diagnosis</b></p>                                                 | <p><i>Participant 2: “So what I’m saying is, you know them mobile buses... in the shopping area, where people go shops, or outside the hospital... So they set them up and people are walking past, and even though they can’t be bothered to go to the doctors, and they look and they think I’ll just pop in</i></p> <p><i>Participant 1: Cos you wouldn’t hesitate you know, you’d just go in.</i></p> <p><i>Participant 2: You’re just a person, they don’t know and they’re just seeing what’s there, or what’s there or what’s the problem with you. If there’s no problem</i></p> <p><i>Participant 3: People think you don’t want to think you’re, feel as if you’re wasting the doctor’s time” (Focus group 1)</i></p>                                                                                                                                                                                                                                                                                                                                                                                                                                                                             |
| <p><b>Intervention content</b></p> <p>More specific symptom advice</p> <p>Messages to combat negative beliefs</p> <p>Smoking cessation</p> | <p><i>Participant 1: “Yeah I think when you say ‘cough’ it’s a bit broad and it’s a bit...You know, you’ve had a cough for two weeks, off you go.</i></p> <p><i>Participant 3: It’d be useful if it was a change in your regular cough” (Focus group 4)</i></p> <p><i>“Positive messages, particularly around lung cancer because everybody, you know it’s like a death knell isn’t it? And actually it’s not, it doesn’t have to be. You know you’re talking here about early diagnosis which is a big deal isn’t it” (Focus group 3)</i></p> <p><i>“You’ve got to include [smoking cessation information]...I think it’s how you deliver the message...not in such a way you feel ashamed for smoking. I’ve noticed [the nurse] has got a way of telling patients how to stop smoking, she does it in a, not in a ‘well you should stop smoking’, that kind of way. She’ll say ‘have you ever thought about giving it up. You know it would improve your chest a bit’. And I’ve seen [the nurse do it] more in a non-lecturey basis, more of a, ‘have you ever thought about it?’ Relaxed, warmer manner. So I’m not lecturing you, it’s your choice. You know it’s bad for you.” (Focus group 4)</i></p> |

## 1 DISCUSSION

2 Our study was the first to explore the influences on lung cancer symptom presentation in high risk,  
3 highly deprived groups across three nations of the UK. Preferences for an intervention targeted at  
4 high-risk groups were ascertained through focus groups. We found evidence from the interviews and  
5 focus groups that individuals who are at high risk for lung cancer tend to be preoccupied by  
6 maintaining health in the short term. Prioritising the daily management of their lung condition led to  
7 avoiding consideration of longer term health problems such as lung cancer, to gain a sense of control  
8 over health in the context of difficult personal circumstances. Health beliefs were found to underpin  
9 behaviour in relation to medical help seeking, where perceptions of 'inevitable but curable' chest  
10 infections led to immediate help seeking. However, 'inevitable but incurable' lung cancer led to  
11 inaction when faced with potentially serious symptoms and anticipated refusal of treatment.  
12 Interview participants felt that the relationship with the healthcare professional was key when  
13 considering medical help seeking. The importance of the relational interaction between provider and  
14 patient was mirrored in the focus groups, where participants felt that a non-judgemental  
15 intervention facilitator was important. Multi-faceted community-based interventions, away from the  
16 traditional healthcare setting, were preferred by participants.

17  
18 Previous empirical studies report prolonged lung cancer symptom presentation due to  
19 misattribution[5,13,15-26,33, 42] and in our study, we found evidence that participants normalised  
20 their symptoms indicative of lung cancer to smoking habit, and lung and other comorbid conditions.  
21 In contrast to previous studies that report haemoptysis as a facilitator to prompt medical help  
22 seeking[13,25,27,43-45], current participants with experience of haemoptysis reported described  
23 avoidant coping, and normalisation when blood was noticed. Dismissal and normalisation of  
24 haemoptysis may be specific to socioeconomically deprived groups. Our highly deprived sample  
25 reported daily struggles with complex physical and mental health needs, and with the challenges  
26 associated with living on no or limited income. Previous studies in socioeconomically deprived  
27 communities report that in the context of competing life demands, health was dealt with reactively  
28 and with low priority[46,47].

29  
30 Fear of being ineligible for treatment due to lifestyle has not been well described in studies with lung  
31 cancer patients or those at high risk[44,48]. In contrast, participants in the current study described  
32 feeling disenthralled to medical services in the context of their lifestyle and circumstances. The  
33 underlying concept of health service candidacy (perceived eligibility for healthcare)[47] may explain  
34 why participants felt unworthy of seeking medical help and is likely to be of particular importance in

1  
2  
3 1 our highly deprived sample. In addition to challenging life circumstances, interview and focus group  
4 2 participants reported fear of being judged and ignored by health professionals due to their smoking  
5 3 habit or perceived social standing, contributing to feelings of unworthiness. Participants reported  
6 4 the desire to be a model patient and to not waste valuable GP time, which influenced medical help  
7 5 seeking. Although the desire to be a 'good citizen' has previously been reported[24,25], to our  
8 6 knowledge, the current study was the first to explore perceptions of appropriate consultation  
9 7 behaviour in a highly deprived sample. Our emerging findings related to candidacy, combined with  
10 8 the desire to exhibit 'good' consultation behaviour, may contribute to normalisation of symptoms  
11 9 previously regarded as serious and therefore discourage help seeking. Consequently, disadvantaged  
12 10 populations are likely to focus on health in the short term, and ignore longer-term health issues  
13 11 which may lead to advanced stage lung cancer diagnosis.  
14 12

15 13 We found that participants held seemingly contradictory views on their lung cancer susceptibility,  
16 14 reporting scepticism about the causal role of smoking in lung cancer alongside perceived inevitability  
17 15 of lung cancer. Beliefs about the link between smoking and lung cancer may reflect societal stigma  
18 16 towards smoking, where participants downplay the negative effects of smoking, possibly to  
19 17 legitimise medical help seeking for symptoms considered related to smoking. Perceived inevitability  
20 18 of lung cancer is likely to reflect high levels of exposure in social networks where there is high  
21 19 incidence and poor outcomes of lung cancer [10], which should minimise normalisation of lung  
22 20 cancer symptoms and prompt help seeking[49]. Contrary to previous studies, current participants  
23 21 reported feeling that lung cancer was inevitable while simultaneously normalising and ignoring  
24 22 haemoptysis, possibly due to a combination of high fear and fatalism about lung cancer, difficult life  
25 23 circumstances and low perceived health service candidacy. High-risk individuals who believe that  
26 24 they cannot legitimately seek medical help because of their former or current lifestyle may therefore  
27 25 be resigned to the prospect of developing lung cancer.  
28 26

29 27 A major strength of this study was the rigorous sampling procedure. We screened postcodes to  
30 28 ensure participants resided in the lowest quintile of deprivation, and measured multiple additional  
31 29 indicators of deprivation. Individual and area level indicators confirm that our sample was highly  
32 30 deprived, for instance most were unemployed and seeking benefits, and rented social housing. In  
33 31 addition, we recruited participants with no previous diagnosis of lung cancer, without mention of  
34 32 lung cancer until discussed by participants during the interview, or at the end of the interview. These  
35 33 recruitment and interview procedures meant we were able to explore previous and anticipated lung  
36 34 cancer symptom presentation in those who were symptomatic or asymptomatic. This strategy was  
37 35  
38 36  
39 37  
40 38  
41 39  
42 40  
43 41  
44 42  
45 43  
46 44  
47 45  
48 46  
49 47  
50 48  
51 49  
52 50  
53 51  
54 52  
55 53  
56 54  
57 55  
58 56  
59 57  
60 58

1 employed to overcome the methodological limitations associated with studying either retrospective  
2 or anticipated symptom presentation in isolation[15]. However, our qualitative study was unable to  
3 establish causal links between barriers and help seeking, nor can we generalise or compare the  
4 findings to high socioeconomic groups; instead, we conducted an in-depth study to explore how best  
5 to engage high risk, highly deprived individuals in early lung cancer diagnosis. Although we carefully  
6 sampled participants and collected additional demographic measures to validate our sampling  
7 frame, some GP practices were asked to recruit by specific smoking status rather than the whole  
8 range of smoking status, potentially introducing bias to our sample. In addition, we were unable to  
9 conduct a focus group in Scotland due to low response, which is a potential limitation of the study.  
10 Finally, focus group participants were recruited opportunistically, with the potential that participants  
11 were more favourably disposed to an intervention.

### 12 13 **Practice and policy implications**

14  
15 With a comorbid lung condition and smoking history, those who are high risk for lung cancer will, in  
16 the main, be symptomatic. To avoid normalisation of symptoms, it is important to highlight the  
17 significance of changing and multiple symptoms. High risk individuals should be empowered to seek  
18 timely medical help and made to feel welcome, not judged or blamed for their current or former  
19 lifestyle. For instance, interventions targeted at disadvantaged populations could be conducted  
20 outside of the traditional healthcare setting. Our findings highlight the importance of an intervention  
21 where participants would be invited to attend, as opposed to presenting to the GP surgery, in order  
22 to eliminate concerns about wasting GP time and legitimise their attendance. Community based  
23 interventions have the potential to harness the relational aspects of help seeking, through  
24 interventions led by non-judgemental and welcoming facilitators. It is possible that previous mass  
25 media and social marketing lung cancer awareness interventions report low campaign reach to  
26 deprived groups [34,35] in part because they were not designed to motivate help seeking through  
27 intensive approaches to build trusting relationships and confidence. More research is required to  
28 understand how the relational aspects of help seeking could be operationalised in an intervention.

29  
30 Over half of the current sample described mental health problems and/or difficult current or former  
31 life circumstances. Intervention developers and healthcare professionals in highly deprived  
32 communities should be aware of these wider social and contextual factors; they should receive  
33 training to recognise such circumstances and know how to appropriately signpost. Finally, we  
34 suggest that the current UK health system may encourage patients with a lung condition to focus on



1  
2  
3 1 short term management of their condition. GP prescribing of antibiotics and the use of rescue packs  
4  
5 2 (prescribed antibiotics for storage at home in the event of an exacerbation) may inadvertently  
6  
7 3 reinforce patients to detect and act on symptoms of a chest infection[50]. There is potential that this  
8  
9 4 current standard of care could be adapted to educate and encourage patients with a lung condition  
10  
11 5 to detect symptoms of lung cancer, thereby shifting the focus to longer term health. More research  
12  
13 6 is required to understand how to motivate highly deprived groups to consider health in the long  
14  
15 7 term, while recognising the wider social determinants of health[51].  
16  
17 8

## 18 9 **Conclusion**

19  
20 11 The challenges of living in an area of deprivation with social exclusion issues, combined with fear of  
21  
22 12 judgement by health professionals, contribute to avoidance and ignoring of lung cancer symptoms.  
23  
24 13 Multi-faceted community based interventions are required to highlight lung cancer symptoms, the  
25  
26 14 importance of early diagnosis and empower people who are high risk for lung cancer to seek timely  
27  
28 15 medical help.  
29  
30 16  
31 17  
32 18  
33 19  
34 20  
35 21  
36 22  
37 23  
38 24  
39 25  
40 26  
41 27  
42 28  
43 29  
44 30  
45 31  
46 32  
47 33  
48 34  
49  
50  
51  
52  
53  
54  
55  
56  
57  
58  
59  
60

1  
2  
3 1  
4  
5 2 **Additional information**  
6  
7 3

8 4 **Ethics approval and consent to participate**

9  
10 5 The study received ethical approval from Southampton Central- Hampshire A Research Ethics  
11 6 Committee (16/SC/0589). Written informed consent was obtained from all participants who took  
12 7 part in the study.  
13  
14 8

15 9  
16 9 **Consent for publication**

17  
18 10 Not applicable  
19  
20 11

21 12 **Data sharing**

22  
23 13 Qualitative data is not publicly available for this study to maintain participant confidentiality.  
24  
25 14

26 15 **Competing interests**

27  
28 16 The authors confirm that there are no conflicts of interest.  
29  
30 17

31 18 **Funding**

32  
33 19 This work was supported by Cancer Research UK (grant reference number: C16377/A22034).  
34  
35 20

36 21 **Author contributorship**

37  
38 22 All authors (GMM, JH, KH, PM, RDN, GN, ST, AMT, KB) designed the study. GMM and JH conducted,  
39 23 coded and analysed the interviews and focus group data. All authors contributed to the  
40 24 interpretation of data. GMM drafted the manuscript and all authors contributed to the review and  
41 25 editing of the manuscript. All authors read and approved the final manuscript.  
42  
43  
44  
45 26

46 27 **Acknowledgements**

47  
48 28 We would like to thank everyone who helped with recruitment for this study, and all the participants  
49 29 who took part in the study; without these individuals this study would not have been possible. We  
50 30 would like to thank the Advisory Group (Anthony Byrne, Gareth Collier, Adrian Edwards, Dyfed  
51 31 Huws, David Lewis, Maura Matthews and Fiona Walter) and the study Administrator Lucy Watkins,  
52 32 for their ongoing support and advice throughout the study.  
53  
54  
55  
56  
57 33  
58 34  
59  
60

## References

1. Bray F, Ferlay J, Soerjomataram I, Siegel RL, Torre LA, Jemal A. Global cancer statistics 2018: GLOBOCAN estimates of incidence and mortality worldwide for 36 cancers in 185 countries. *CA: A Cancer Journal for Clinicians*. 2018;0(0).
2. Allemani C, Matsuda T, Di Carlo V, Harewood R, Matz M, Nikšić M, et al. Global surveillance of trends in cancer survival 2000–2014 (CONCORD-3): analysis of individual records for 37 513 025 patients diagnosed with one of 18 cancers from 322 population-based registries in 71 countries. *The Lancet*. 2018;391(10125):1023-75.
3. McPhail S, Johnson S, Greenberg D, et al. Stage at diagnosis and early mortality from cancer in England. *BJC* 2015;112(1):108-15. doi: 10.1038/bjc.2015.49.
4. Barrett J, Hamilton W. Pathways to the diagnosis of lung cancer in the UK: a cohort study. *BMC Med Prac*. 2008;9(31). doi: 10.1186/1471-2296-9-31.
5. Mitchell ED, Rubin G, Macleod U. Understanding diagnosis of lung cancer in primary care: qualitative synthesis of significant event audit reports. *BJGP* 2013;63(606):37-46. doi: 10.3399/bjgp13X660760.
6. Lyratzopoulos G, Neal RD, Barbiere J, et al. Variation in number of general practitioner consultations before hospital referral for cancer: findings from the 2010 National Cancer Patient Experience Survey in England. *Lancet Oncol* 2012;13(4):353-65. doi: 10.1016/S1470-2045(12)70041-4.
7. Iyen-Omofoman B, Tata L, Baldwin DR, et al. Using socio-demographic and early clinical features in general practice to identify people with lung cancer earlier. *Thorax* 2012;68:451-9.
8. Hipsley-Cox J, Coupland C. Identifying patients with suspected lung cancer in primary care: derivation and validation of an algorithm. *BJGP* 2011;61(592):715-23. doi: 10.3399/bjgp11X606627.
9. NICE. NICE guidelines for lung cancer: diagnosis and management. *NICE*. 2015. Available at: <https://www.nice.org.uk/guidance/cg121> [accessed 04.06.2018].
10. National Cancer Registration and Analysis Service. Cancer by deprivation in England: 1996-2011. 2014. Available at: [http://www.ncin.org.uk/about\\_ncin/cancer\\_by\\_deprivation\\_in\\_england](http://www.ncin.org.uk/about_ncin/cancer_by_deprivation_in_england) [accessed 04.06.2018].
11. Sekine Y, Katsura H, Koh E, et al. Early detection of COPD is important for lung cancer surveillance. *Eur Resp J* 2012;39(5):1230-40. doi: 10.1183/09031936.00126011.
12. Malhotra J, Malvezzi M, Negri E, et al. Risk factors for lung cancer worldwide. *Eur Resp J* 2016;48:899-902. doi: 10.1183/13993003.00359-2016.

- 1  
2  
3 1 13. Smith SM, Campbell NC, MacLeod U *et al*. Factors contributing to the time taken to consult  
4 with symptoms of lung cancer: a cross-sectional study. *Thorax* 2009;**64**(6):523-31.  
5 2  
6 3 14. Friedemann-Smith C, Whitaker K, Winstanley K, Wardle J. Smokers are less likely than non-  
7 smokers to seek help for a lung cancer 'alarm' symptom. *Thorax* 2016;**71**(7).  
8 4  
9 doi.org/10.1136/thoraxjnl-2015-208063  
10 5  
11 6 15. Brouselle A, Breton M, Benhadj L *et al*. Explaining time elapsed prior to cancer diagnosis:  
12 patients' perspectives. *BMC Health Serv Res* 2017;**17**(1):448. doi: 10.1186/s12913-017-2390-1.  
13 7  
14 16. McLachlan S, Mansell G, Sanders T *et al*. Symptom perceptions and help-seeking behaviour  
15 prior to lung and colorectal cancer diagnoses: a qualitative study. *Fam Pract*. 2015;**32**(5):568-77.  
16 9  
17 doi: 10.1093/fampra/cmz048.  
18 10  
19 17. Caswell G, Seymour J, Crosby V *et al*. Lung cancer diagnosed following an emergency  
20 admission: exploring patient and carer perspectives on delay in seeking help. *Sup Care Cancer*  
21 12  
22 2017;**25**(7):2259-66. doi: 10.1007/s00520-017-3633-8.  
23 13  
24 18. Brindle L, Pope C, Corner J, *et al*. Eliciting symptoms interpreted as normal by patients with  
25 early-stage lung cancer: could GP elicitation of normalised symptoms reduce delay in diagnosis?  
26 Cross-sectional interview study. *BMJ Open* 2012;**2**(6):1977. doi.org/10.1136/bmjopen-2012-001977.  
27 15  
28 16 19. Lyratzopoulos G, Vedsted P, Singh H. Understanding missed opportunities for more timely  
29 diagnosis of cancer in symptomatic patients after presentation. *BJC* 2015;**112**(1):84-91. doi:  
30 17  
31 10.1038/bjc.2015.47.  
32 18  
33 20 20. Emery JD, Walter FM, Gray V *et al*. Diagnosing cancer in the bush: a mixed-methods study of  
34 symptom appraisal and help-seeking behaviour in people with cancer from rural Western Australia.  
35 20  
36 21 *Fam Pract* 2013;**30**(5):541-50. doi: 10.1093/fampra/cms087.  
37 21  
38 22 21. Birt L, Hall N, Emery J *et al*. Responding to symptoms suggestive of lung cancer: a qualitative  
39 interview study. *BMJ Open* 2014;**11**(1);doi: 10.1136/bmjresp-2014-000067.  
40 23  
41 22. Chatwin J, Sanders C. The influence of social factors on help-seeking for people with lung  
42 24  
43 25 22. Chatwin J, Sanders C. The influence of social factors on help-seeking for people with lung  
44 cancer. *Eur J Cancer Care*. 2013;**22**(6):709-13. doi: 10.1111/ecc.12078.  
45 26  
46 27 23. Carter-Harris L. Lung Cancer Stigma as a Barrier to Medical Help-Seeking Behavior: Practice  
47 Implications. *J Am Assoc Nurse Pract* 2015;**27**(5):240-5. doi: 10.1002/2327-6924.12227.  
48 28  
49 29 24. Tod A, Craven J, Allmark P. Diagnostic delay in lung cancer: a qualitative study. *J Adv Nurs*  
50 29  
51 2008;**61**(3):336-43. doi: 10.1111/j.1365-2648.2007.04542.x.  
52 30  
53 31 25. Tod A, Joanne R. Overcoming delay in the diagnosis of lung cancer: a qualitative study. *Nurs*  
54 *Standard* 2010;**24**(31):34-43. doi: 10.7748/ns2010.04.24.31.35.c7690.  
55 32  
56 33 26. Corner J, Hopkinson J, Roffe L. Experience of health changes and reasons for delay in seeking  
57 care: a UK study of the months prior to the diagnosis of lung cancer. *Thorax* 2006;**60**:1382-91.  
58 34  
59  
60

- 1  
2  
3 1 27. Braybrook DE, Witty KR, Robertson S. Men and lung cancer: a review of the barriers and  
4 2 facilitators to male engagement in symptom reporting and screening. *J Men's Health* 2011;**8**(2):93-9.  
5 3 <https://doi.org/10.1016/j.jomh.2011.03.002>.  
6 4  
7 8 28. Chapple A, Ziebland S, McPherson A. Stigma, shame, and blame experienced by patients  
8 5 with lung cancer: qualitative study. *BMJ* 2004;**328**:1470. [doi.org/10.1136/bmj.38111.639734.7C](https://doi.org/10.1136/bmj.38111.639734.7C).  
9 6  
10 29. Murray SA, Kutzer Y, Habgood E *et al*. Reducing barriers to consulting a General Practitioner  
11 7 in patients at increased risk of lung cancer: a qualitative evaluation of the CHEST Australia  
12 8 intervention. *Fam Pract* 2017;**34**(6):740-6. [doi.org/10.1093/fampra/cmz057](https://doi.org/10.1093/fampra/cmz057).  
13 9  
14 30. Marlow LA, Waller J, Wardle J. Does lung cancer attract greater stigma than other cancer  
15 10 types? *Lung Cancer* 2015;**88**(1):104-7. doi: 10.1016/j.lungcan.2015.01.024.  
16 11  
17 31. Quaife S, McEwen A, James S, Wardle J. Smoking is associated with pessimistic and avoidant  
18 12 beliefs about cancer: results from the International Cancer Benchmarking Partnership. *BJC*. 2015  
19 13 **112**(11):1799-804. doi: 10.1038/bjc.2015.148.  
20 14  
21 32. Quaife S, Marlow L, McEwen A, Wardle J. Attitudes towards lung cancer screening in  
22 15 socioeconomically deprived and heavy smoking communities: informing screening communication.  
23 16 *HEX* 2017;**20**(4):563-73. doi: 10.1111/hex.12481.  
24 17  
25 33. Mor V, Masterson-Allen S, Goldberg R, *et al*. Pre-diagnostic symptom recognition and help  
26 18 seeking among cancer patients. *J Community Health* 1990;**15**(4):253-66.  
27 19  
28 34. Moffat J, Bentley A, Ironmonger L, Boughey A, Radford G, Duffy S. The impact of national  
29 20 cancer awareness campaigns for bowel and lung cancer symptoms on sociodemographic inequalities  
30 21 in immediate key symptom awareness and GP attendances. *British Journal Of Cancer*. 2015;**112**:S14.  
31 22  
32 35. Kennedy MPT, Cheyne L, Darby M, Plant P, Milton R, Robson JM, *et al*. Lung cancer stage-shift  
33 23 following a symptom awareness campaign. *Thorax*. 2018.  
34 24  
35 36. Smith S, Fielding S, Murchie P, Johnston M, Wyke S, Powell R, *et al*. Reducing the time before  
36 25 consulting with symptoms of lung cancer: a randomised controlled trial in primary care. *The British*  
37 26 *Journal of General Practice*. 2013;**63**(606):e47-e54.  
38 27  
39 37. Tong A, Sainsbury P, Craig J. Consolidated criteria for reporting qualitative research (COREQ):  
40 28 a 32-item checklist for interviews and focus groups. *Int J Quality Health Care* 2007;**19**(6):349-57.  
41 29  
42 38. Leventhal H, Brissette I, Leventhal E. The common-sense model of self-regulation of health  
43 30 and illness. In: *The Self-regulation of Health and Illness Behaviour*. *Routledge*. 2003:42-65.  
44 31  
45 39. Francis JJ, Johnston M, Robertson C *et al*. What is an adequate sample size? Operationalising  
46 32 data saturation for theory-based interview studies. *Psych Health* 2010;**25**(10):1229-45. doi:  
47 33 [10.1080/08870440903194015](https://doi.org/10.1080/08870440903194015).  
48 34  
49 40. Ritchie LD, Lewis J. *Qualitative Research Practice: A Guide for Social Science Students and*  
50 35 *Researchers*. Sage: London. 2003.  
51 36  
52  
53  
54  
55  
56  
57  
58  
59  
60

- 1  
2  
3 1 41. Ward D.J., Furber C., Tierney S., Swallow V. (2013) Using Framework Analysis in nursing  
4 2 research: a worked example. *Journal of Advanced Nursing* 69(11), 2423–2431. 10.1111/jan.12127  
5 3  
6 3 42. Anderson R, Paarup B, Vedsted P, *et al.* 'Containment' as an analytical framework for  
7 4 understanding patient delay: a qualitative study of cancer patients' symptom interpretation  
8 5 processes. *Soc Sci Med* 2010;**71**(2):378-85. doi: 10.1016/j.socscimed.2010.03.044.  
9 6  
10 6 43. Chan W, Clark A, Dervedde U *et al.* Symptoms, delay to presentation and survival in lung  
11 7 cancer. *Thorax* 2016;**71**(3):80-1.  
12 8  
13 8 44. Corner J, Hopkinson J, Fitzsimmons D, *et al.* Is late diagnosis of lung cancer inevitable?  
14 9 Interview study of patients' recollections of symptoms before diagnosis. *Thorax* 2005;**60**:314-9.  
15 10 doi.org/10.1136/thx.2004.029264.  
16 11  
17 11 45. Dobson C, Russell A, Brown S, Rubin G. The role of social context in symptom appraisal and  
18 12 help-seeking among people with lung or colorectal symptoms: A qualitative interview study. *Eur J*  
19 13 *Cancer Care* 2018;**27**(2):e12815. doi: 10.1111/ecc.12815.  
20 14  
21 14 46. Smits S, McCutchan G, Wood F *et al.* Development of a Behavior Change Intervention to  
22 15 Encourage Timely Cancer Symptom Presentation Among People Living in Deprived Communities  
23 16 Using the Behavior Change Wheel. *Annals Beh Med.* 2016;**52**(6):474-488. doi: 10.1007/s12160-016-  
24 17 9849-x.  
25 18  
26 18 47. Dixon-Woods M, Cavers D, Agarwal S *et al.* Conducting a critical interpretive synthesis of the  
27 19 literature on access to healthcare by vulnerable groups. *BMC Med Res Method* 2006;**6**(35).  
28 20 doi.org/10.1186/1471-2288-6-35.  
29 21  
30 21 48. Smith SM, Murchie P, Devereux G, Johnston M, Lee AJ, Macleod U, *et al.* Developing a complex  
31 22 intervention to reduce time to presentation with symptoms of lung cancer. *The British Journal of*  
32 23 *General Practice.* 2012;**62**(602):e605-e15.  
33 24  
34 24 49. Macdonald S, Watt G, Macleod U. In search of the cancer candidate: can lay epidemiology  
35 25 help? *Soc Health Illness* 2013;**35**(4):575-91. doi: 10.1111/j.1467-9566.2012.01513.x.  
36 26  
37 26 50. NICE. NICE guidelines for lung cancer: diagnosis and management. *NICE.* 2015. Available at:  
38 27 <https://www.nice.org.uk/guidance/cg121> [accessed 04.06.2018].  
39 28  
40 28 51. Barton H, Grant M. A health map for the local human habitat. *J Royal Soc Promotion Health.*  
41 29 2006;**126**(6):252-3.  
42 30  
43 31  
44  
45  
46  
47  
48  
49  
50  
51  
52  
53  
54  
55  
56  
57  
58  
59  
60

**Supplementary File 1. Consolidated criteria for reporting qualitative studies (COREQ): 32-item checklist with page numbers to indicate section of the article [34]**

| Checklist item                                 | Questions to consider                                                                                                                                           | Page number in article |
|------------------------------------------------|-----------------------------------------------------------------------------------------------------------------------------------------------------------------|------------------------|
| <b>Domain 1: Research team and reflexivity</b> |                                                                                                                                                                 |                        |
| <b>Personal Characteristics</b>                |                                                                                                                                                                 |                        |
| 1. Interviewer/facilitator                     | Which author/s conducted the interview or focus group?                                                                                                          | 8                      |
| 2. Credentials                                 | What were the researcher's credentials? <i>E.g. PhD, MD</i>                                                                                                     | 8                      |
| 3. Occupation                                  | What was their occupation at the time of the study?                                                                                                             | 8                      |
| 4. Gender                                      | Was the researcher male or female?                                                                                                                              | 8                      |
| 5. Experience and training                     | What experience or training did the researcher have?                                                                                                            | 8                      |
| <b>Relationship with participants</b>          |                                                                                                                                                                 |                        |
| 6. Relationship established                    | Was a relationship established prior to study commencement?                                                                                                     | 7                      |
| 7. Participant knowledge of the interviewer    | What did the participants know about the researcher? <i>e.g. personal goals, reasons for doing the research</i>                                                 | 7                      |
| 8. Interviewer characteristics                 | What characteristics were reported about the interviewer/facilitator? <i>e.g. Bias, assumptions, reasons and interests in the research topic</i>                | 8                      |
| <b>Domain 2: study design</b>                  |                                                                                                                                                                 |                        |
| <b>Theoretical framework</b>                   |                                                                                                                                                                 |                        |
| 9. Methodological orientation and Theory       | What methodological orientation was stated to underpin the study? <i>e.g. grounded theory, discourse analysis, ethnography, phenomenology, content analysis</i> | 8-9                    |
| <b>Participant selection</b>                   |                                                                                                                                                                 |                        |
| 10. Sampling                                   | How were participants selected? <i>e.g. purposive, convenience, consecutive, snowball</i>                                                                       | 5-6                    |
| 11. Method of approach                         | How were participants approached? <i>e.g. face-to-face, telephone, mail, email</i>                                                                              | 6-7                    |
| 12. Sample size                                | How many participants were in the study?                                                                                                                        | 5, 6, 10, 16           |
| 13. Non-participation                          | How many people refused to participate or dropped out? Reasons?                                                                                                 | 9                      |
| <b>Setting</b>                                 |                                                                                                                                                                 |                        |
| 14. Setting of data collection                 | Where was the data collected? <i>e.g. home, clinic, workplace</i>                                                                                               | 8                      |
| 15. Presence of non-participants               | Was anyone else present besides the participants and researchers?                                                                                               | 8                      |
| 16. Description of sample                      | What are the important characteristics of the sample? <i>e.g. demographic data, date</i>                                                                        | 9-10, 16               |
| <b>Data collection</b>                         |                                                                                                                                                                 |                        |
| 17. Interview guide                            | Were questions, prompts, guides provided by the authors? Was it pilot tested?                                                                                   | Appendix 2-4           |

|                                        |                                                                                                                                          |              |
|----------------------------------------|------------------------------------------------------------------------------------------------------------------------------------------|--------------|
| 18. Repeat interviews                  | Were repeat interviews carried out? If yes, how many?                                                                                    | 6            |
| 19. Audio/visual recording             | Did the research use audio or visual recording to collect the data?                                                                      | 6, 8         |
| 20. Field notes                        | Were field notes made during and/or after the interview or focus group?                                                                  | 8            |
| 21. Duration                           | What was the duration of the interviews or focus group?                                                                                  | 8            |
| 22. Data saturation                    | Was data saturation discussed?                                                                                                           | 7            |
| 23. Transcripts returned               | Were transcripts returned to participants for comment and/or correction?                                                                 |              |
| <b>Domain 3: analysis and findings</b> |                                                                                                                                          |              |
| <b>Data analysis</b>                   |                                                                                                                                          |              |
| 24. Number of data coders              | How many data coders coded the data?                                                                                                     | 8            |
| 25. Description of the coding tree     | Did authors provide a description of the coding tree?                                                                                    | 8-9          |
| 26. Derivation of themes               | Were themes identified in advance or derived from the data?                                                                              | 8-9          |
| 27. Software                           | What software, if applicable, was used to manage the data?                                                                               | 8-9          |
| 28. Participant checking               | Did participants provide feedback on the findings?                                                                                       | 8-9          |
| <b>Reporting</b>                       |                                                                                                                                          |              |
| 29. Quotations presented               | Were participant quotations presented to illustrate the themes / findings? Was each quotation identified? <i>e.g. participant number</i> | 14-16, 18-19 |
| 30. Data and findings consistent       | Was there consistency between the data presented and the findings?                                                                       | 11-19        |
| 31. Clarity of major themes            | Were major themes clearly presented in the findings?                                                                                     | 11-19        |
| 32. Clarity of minor themes            | Is there a description of diverse cases or discussion of minor themes?                                                                   | 11-19        |



## Supplementary File 2: Interview topic guide

### Interview prologue

- Introduce the researcher, ensure the participant is comfortable.
- Explain purpose of the interview:
  - *“We are interested in lung health.*
  - *We would like to know how people cope with lung symptoms and how they decide if they should go to the doctor or not.*
  - *Some of the questions I ask during the interview will be about smoking. I’m not here to tell you to stop smoking; I’m just interested if you have any experiences of smoking.*
  - *I’m not a clinician so I can’t give you any advice on symptoms, but I can tell you where you can go to get help”*
- Check understanding of interview purpose, role of researcher, and what will happen in the interview. Give opportunity for questions.
- Partners or family members will be welcome to join the interviews to explore relational influences on lung symptom awareness and help seeking, and the interview topic guide will be adapted accordingly.
- After establishing what is understood about the study, and answering any questions, explain that the interview will be recorded. Obtain consent for the interview and for the recording. If not already done, set up and switch on the recording equipment while the participant signs the consent form.

*Note to interviewer: the grey boxes signify the key topics to be explored during the interview. The questions listed below are examples of suggested prompts for each topic. You are not required to read these verbatim unless specified.*

**Overall aim of the qualitative interview:**

-To explore how people with a history of smoking and respiratory conditions interpret and act on new or changing lung symptoms (how people cope with lung symptoms and how they decide to go to the doctor with symptoms)

-To explore the influences of perceived risk, fear, shame, stigma, family and friends on lung symptom presentation

**1. Experiences of lung condition**

Establish what lung condition the participant has, how the lung condition affects them, the types of symptoms they experience and how they are usually managed.

*Rationale: introduce the participant to the format of a qualitative interview and make the participant feels comfortable. Establish details of their lung condition.*

**Potential prompts:**

- Can you tell me about your lung condition?
- Tell me about your experiences with X lung condition.
  - How long have you had X condition?
  - What sort of symptoms do you experience?
  - How long do the symptoms usually last?
- What do you think causes these symptoms?
- How do you usually manage your symptoms?
- How are your symptoms usually managed/ treated by your healthcare professional?
  - How effective do you think this is?

## 2. Symptom attribution task

Use as a tool for prompting an in-depth understanding of symptom attributions and confidence to interpret new or changing symptoms.

Include discussion around previous symptom experiences including: what action was taken, if and who they sought medical help from. Explore how their lung condition and smoking history might influence symptom attributions (i.e. do these mask symptoms?) and symptom presentation.

**Rationale:** to explore lung symptom attribution; confidence in recognising and articulating symptoms; previous symptom experience; planning when/how to act on symptoms; influence of smoking history on perceptions of lung symptoms

Ask participant to order symptom cards from symptoms that they would seek medical help quickest for and those they would seek help slowest for (arrow and boxes below will be stretched to A4 size, see page 10). Ask participant to write numbers on the symptom cards. 1= first, 11=last. If they change the order of the symptom, ensure the previous number is crossed out and the new number written on card. Write PID on the back of each symptom card. Take photos of the task.

Say the following phrase verbatim: "We know that people decide go to the doctor at different times with symptoms. I'm going to show you some pieces of card with symptoms on. I'd like you to rank them from the ones that you would go to the doctor with first through to the last on this sheet of paper."

Cut individual symptom cards (see page 12) for the following symptoms. Please rotate the order:

- Coughing up blood
- A cough that doesn't go away
- A long standing cough that gets worse
- Pain in your chest or shoulder
- Persistent breathlessness
- Persistent chest infections
- Persistent tiredness or lack of energy
- Loss of appetite or unexplained weight loss
- Ache or pain when breathing or coughing
- A hoarse voice
- Changes in the appearance of your fingers, such as becoming more curved or their ends becoming larger

See the **glossary of terms at the end of the topic guide** with standardised definitions and additional explanation of symptoms. If the participant does not understand what each symptom means, ask them what they think it means, then refer to the glossary of terms.

First to go to  
the doctor

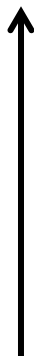

Last to go to  
the doctor

If the participant asks the interviewer what these symptoms are, first **ask the participant what they think they are**. If they ask again either suggest to move on and discuss what they could be after the interview (if appropriate) or say the symptoms have been taken from the NHS website for lung cancer.

*Note to interviewer:* Aim to complete the ordering of symptoms in the task first, and then ask questions in this section. However, if any of the following (2a, 2b, 2c, 2d) is brought up spontaneously by the participant whilst they are doing the card sorting exercise then explore these issues at that point. Then return to the card sorting exercise, followed by questions in the following section (2a, 2b, 2c, 2d).

Topics and prompts for symptom attribution task

Once the symptoms have been ordered, ask:

- Can you tell me why you put x first?
- Can you tell me why you put x last?

### **2a. Symptom experience**

To understand if the participant has experienced the symptom previously- what did they attribute the symptom to? What did they do? If they have not experienced the symptom before, what would they hypothetically do if they were to experience symptom in the future?

- Which of these symptoms have you had before?
  - What did you think the symptom(s) was/were?
  - Which symptom(s) did you go to the doctor with?
    - Why did you decide to go to the doctor with these symptoms?
    - What did the doctor say?
  - Which symptoms did you decide to not go to the doctor with?
    - Why did you decide not to go to the doctor with these symptoms?
- For the other symptoms we have not talked about, if you developed any of them what would you do?
  - How long do you think it would take you to go to the doctor with these symptoms?
  - Can you tell me why it would take you this amount of time to go to your doctor with this symptom?
  - What you think these symptoms could be?
- Are there any symptoms you wouldn't go to the doctor with?
  - Can you tell me why you wouldn't go to the doctor with these symptoms?

## **2b. Detecting change**

Explore how the participant has/would notice new or changing symptoms and their confidence to detect new and changing symptoms. Ask this section generally, but if the participant is struggling then ask them about confidence to detect new and changing symptoms in the context of previous symptoms experiences. i.e. earlier you mentioned you felt breathless for a long time, how confident did you feel to know that this was a new or changing symptom?

- How would you normally tell if any lung symptoms have changed/ are new/ or unusual for you?
  - What would you do if you think you noticed a change in a symptom?
  - How confident would you feel in recognising a change in your usual symptom(s)?
  - How confident would you feel recognising new symptoms?
  - How would you notice a change in any of these symptoms?

## **2c. Barriers**

Explore the influences of barriers and social influences on lung symptom presentation behavior

- Can you think of anything that would influence your decision to go to the doctor with any of these symptoms?
  - Probe barriers/enablers to going to the GP with a symptom:
    - Transport
    - Long wait times/ appointment policies
    - Worry about wasting the doctors time i.e. Some people have told us that they don't go to the doctor as they worry about wasting the doctors time. What do you think about this?
    - The influence of partner/ social influences (who suggested you go/ don't go to the doctor?)
    - How confident would you feel talking to the doctor about these symptoms?
      - How do you feel when you are talking to the doctor?

## **2d. Smoking**

Explore the influence of smoking habit on the ability to notice new or changing symptoms. If/how smoking habit acts as a barrier to seeking medical help. If vaping comes up say something like- that is really interesting, do you mind if I ask you some questions later about vaping if we have time? If they vape then still explore the influence of past smoking on symptom perceptions.

- Would you expect to have any of the symptoms we have talked about because you smoke or used to smoke?
  - Thinking about smoking, how do you think your [past] smoking would affect how you notice if a symptom has changed or is new/ unusual for you?
  - Does your doctor ever discuss smoking with you?
    - How does this make you feel?

### 3. Lung cancer

If appropriate, explore lung cancer knowledge, beliefs about lung cancer and perceived risk here. If brought up spontaneously by the participant earlier in the interview, explore lung cancer then (if appropriate) Confidence to detect a lung cancer symptom. The influences of smoking and perceived risk, shame and associated with lung cancer.

*Rationale:* to explore lung cancer symptom awareness; to explore perceived risk of lung cancer; to explore emotional consequences such as fear, fatalism, guilt, blame; perceived causes and effectiveness of lung cancer detection and treatment; the influence of smoking history on the formation of beliefs about lung cancer.

If it is OK with you, I'm going to ask you some questions about lung cancer. If you feel uncomfortable with any of my questions, please let me know and we can move on.

Potential prompts:

- Earlier you mentioned some of the symptoms that could be lung cancer. Can you think of any other symptoms that you think might be lung cancer?
- What else do you know about lung cancer?
- Can you tell me a little more about what you think about lung cancer as a disease?
  - Where do you think that feeling comes from?
  - What do you think other people's views are on lung cancer?
- What do you think causes lung cancer?
  - If yes and appropriate: How does that make you feel as a [past] smoker?
  - If appropriate: do you ever worry about lung cancer because you [used to] smoke?
  - How does that make you feel?
  - Is there anything in particular that makes you think your risk is high or low?
- How confident would you feel in recognising a symptom that could be lung cancer?
  - How does your [past] smoking affect your confidence in recognising a change in your body that could be lung cancer?
- What would you do if you had a symptom that you thought was lung cancer?

#### 4. Social influences

Explore influences of social networks on help seeking behavior and basis of cancer beliefs.

*Rationale:* to explore social norms, influences and stigma around help seeking; people who they know who have had lung cancer and the effects on beliefs and perceptions; how social networks might influence help-seeking

- If you had a symptom you thought might be lung cancer, would you tell anyone about it?
  - Who would you tell?
  - Why would you tell that person?
  - What do you think they would say to you if you told them about a symptom?
  - Would they encourage/discourage you to visit your doctor?
- Has anyone ever noticed a symptom of yours and suggest that you go to the doctor?
  - Probe: who/ what happened.
- We know that lung cancer isn't as common as other types of cancer like breast cancer. Do you know anyone who has ever been diagnosed with lung cancer?
- Can you tell me about the effects that [person] having lung cancer has had on you?
  - How has this affected your views about lung cancer?

#### 5. Closing questions

Final questions to end on a positive note

*Rationale:* to end the interview on a positive note

- If you were to offer anyone some advice on lung symptoms, what would it be?
- If the NHS were to make some changes to the services they offer to help people with lung symptoms get seen quicker, what would you suggest they change?
- Can you tell me about a positive experience of going to the doctor?

I know we've talked about a lot of things today, but would you like to tell me about anything else that we haven't talked about?

### Debrief

- Summarise the interview and address any questions or concerns.
- Check whether it is ok to contact them if there is anything that needs to be clarified after listening back to the conversation.
- Ensure that they know how to contact us for further help/information/to add further information
- Thank them for their time and give them the gift voucher.
- If the participant discloses symptoms during the interview suggest they seek medical help from their GP. Offer lung cancer leaflet and site specific helpline numbers.
- Have stop smoking service details available if they request it
- Offer to provide a summary of study findings

### Helpline numbers

#### Wales

- Tenovus Cancer Care support line on 0808 808 1010. The support line is open 8am-8pm, 7 days a week. Calls are free from a BT landline.

#### England and Scotland

- British Lung Foundation helpline on 03000 030555. This helpline is open 9am-5pm Monday to Friday. Calls cost the same as a local call.
- Roy Castle Lung Cancer Foundation helpline on 0333 323 7200. This helpline is open 9am-5pm Monday to Friday. Calls are free from a BT landline.



1  
2  
3 **Symptoms in the symptom task:**

4 **Coughing up blood**  
5  
6  
7

8  
9 **A cough that doesn't go away**  
10  
11

12  
13 **A long standing cough that gets worse**  
14  
15  
16  
17

18  
19 **Pain in your chest or shoulder**  
20  
21

22  
23 **Persistent breathlessness**  
24  
25  
26

27  
28 **Persistent chest infections**  
29  
30

31  
32 **Persistent tiredness or lack of energy**  
33  
34  
35

36  
37 **Loss of appetite or unexplained weight**  
38 **loss**  
39  
40  
41

42  
43 **Ache or pain when breathing or**  
44 **coughing**  
45  
46  
47

48  
49 **A hoarse voice**  
50  
51

52  
53 **Changes in the appearance of your**  
54 **fingers, such as becoming more curved**  
55 **or their ends becoming larger**  
56  
57  
58  
59  
60

## **Glossary of terms**

### ***Coughing up blood***

If you notice that there is some blood coming up when you cough

### ***A cough that doesn't go away***

If you have a nagging cough that just doesn't seem to go away

### ***A long standing cough that gets worse***

You have had a cough for a long time but you think that it might have got worse

### ***Pain in your chest or shoulder***

A sharp or achy pain in either your chest or shoulder, or both

### ***Persistent breathlessness***

You feel like you can't catch your breath or become out of breath when doing tasks you used to be fine with

### ***Persistent chest infections***

If you have had a few chest infections in a row and they don't seem to be getting better or keep coming back

### ***Persistent tiredness or lack of energy***

If you have been feeling tired for a while or just feel like you don't have any energy

### ***Loss of appetite or unexplained weight loss***

If you have been losing weight without trying to and can't explain why or you just haven't been feeling up to eating the amount you normally would for a while

### ***Ache or pain when breathing or coughing***

If you have a sharp pain or achy feeling when you cough or breathe

### ***A hoarse voice***

A croaky or gravelly voice

### ***Changes in the appearance of your fingers, such as becoming more curved or their ends becoming larger***

If you notice that the ends of your fingers have changed shape

### ***Persistent definition***

Something that you notice you have had for a while and won't go away.

1  
2  
3  
4  
5  
6  
7  
8  
9  
10  
11  
12  
13  
14  
15  
16  
17  
18  
19  
20  
21  
22  
23  
24  
25  
26  
27  
28  
29  
30  
31  
32  
33  
34  
35  
36  
37  
38  
39  
40  
41  
42  
43  
44  
45  
46  
47  
48  
49  
50  
51  
52  
53  
54  
55  
56  
57  
58  
59  
60

First to go to the doctor



Last to go to the doctor

For peer review only

### Supplementary File 3: HPCP focus group topic guide

**Focus group aim:** To explore the needs and preferences from members of the public and local stakeholders (healthcare professionals/ community partners) for an intervention to support earlier lung cancer detection and diagnosis, targeted at high risk, harder to reach groups (over 40's, who are current/former smokers, living in areas of deprivation with serious lung comorbidity i.e. COPD).

#### Introduction

- Explain the aims of the focus group discussion. Emphasise that the focus group is not a test; we are interested in participants' preferences for an intervention for "lung health" to prompt earlier lung cancer symptom presentation, and how we could access people to take part in an intervention. All comments are welcomed: positive and negative.
  - 'We know that people who are high risk for lung cancer (people over the age of 40, living in deprived areas, who currently smoke or used to smoke and have a lung condition like COPD) are often diagnosed at a late stage, where treatment options are limited and a cure is less likely. This might be because they delay seeking medical advice with symptoms suggestive of lung cancer.  
We are considering if we should develop something that will give people who are high risk for lung cancer information about symptoms and when/ where they should go and seek medical help from.  
As healthcare professionals and people who work in deprived communities, we would like to know what you think about if we should do this. If you think this is a good idea, we would also like to know how best we can access this target group and invite them to take part in an intervention about lung health. Your ideas and suggestions are really valuable to us because of your wealth of experience, so all comments are welcomed (both positive and negative)'.
- Explain the voluntary nature of the study and that the focus group will be recorded with permission. If not already done, set up and switch on the recording equipment while participants sign the consent form.
- Before starting the focus group, remind participants about confidentiality and ask participants not to talk over each other. Go around the circle and ask participants to introduce themselves for the transcription.

**Rationale:** to explore whether the findings resonate with patients and members of the public in their local community

## Part1. Phase 1 interview findings

### Discussion of Phase 1 interview findings

Provide a short overview of key findings from Phase 1 interviews regarding barriers and enablers to lung cancer awareness and early symptom presentation in the target group. Ask the group to share their thoughts on the interview findings, and whether they resonate with them.

'We have been interviewing people across the UK who are high risk for lung cancer- people over the age of 40 who have a lung condition like COPD, who currently smoke or used to smoke and live in deprived areas. We wanted to understand how people think about symptoms of lung cancer, how and when people decide to go to the doctor with lung symptoms and the barriers to going to the doctor with these symptoms.

We found that people are completely fixated on detecting chest infections and look out for symptoms of a chest infection most days. They were really good at knowing when they had a chest infection and going to the doctor quickly to get antibiotics because they know it can be treated.

We also found that people tend to deny or ignore health problems that might affect them in the future, like lung cancer so may not go to the doctor with some serious symptoms. We think this is because they think that although lung cancer is inevitable, they also think that it cannot be cured so don't go and see the doctor

We want to develop something that can help people get these important symptoms of lung cancer seen to quicker by a medical professional, but we are not really sure how to do this. We would like to know what you think.'

- How can we do this?
- What do you think of these findings?
- To what extent do these findings resonate with you?

**Rationale:** to seek views on how to access the target group for an intervention and explore preferences for an intervention to support earlier presentation, including mode of delivery, target group, content and stop smoking information

### Preferences on intervention content

- What sorts of things do you think people would like to know / what skills would they like to learn?
  - What do you think would be most useful to people?
  - What information would be the highest priority/most important for them?
  - Should we avoid any information?
  - Do you think it is best to focus on symptoms or health beliefs?

### Preferences on intervention format

- How can we support people to seek medical help quickly with lung cancer symptoms? [what format]
  - Probe: a group one-off educational session to promote “lung health” in the local community; a leaflet/DVD; a lung health check; event in the community; posters in the local community
  - Do you think people want education or to learn ‘skills for health’?
    - What sort of skills do you think people would like to know?
- Who do you think would be best to lead or facilitate an intervention about lung health/ encourage people to seek medical help quickly with lung cancer symptoms?
  - Probe: patient representative, lay advisor, community partner, healthcare professional (GP, practice nurse, smoking cessation counsellor, respiratory nurse specialist...?)
- When would be best to support people to manage their lung health?
  - What do you think about using the point at which they are diagnosed with a lung condition as a ‘teachable moment’ to do an intervention about lung cancer?
  - What about during a regular check-up appointment with the nurse i.e. six monthly COPD clinic reviews?
- What do you think about a brief intervention with health care professionals in addition to a public facing intervention?
  - What would be useful to you as healthcare professionals?
- The intention is that this intervention would be implemented across the UK. How do you think everything we have talked about today might need to differ based on where someone lives (i.e. different countries) or the person in the intervention?
  - How could we incorporate an intervention into the different models of care across regions/countries?
- How do you think this intervention could fit with other current or planned health promotion activities?

### Accessing intervention participants

- Where could we approach our target group in an intervention about lung cancer/lung health?
  - Probe: through community pharmacies, primary care, community nurses, existing groups for people with lung conditions?
    - Probe: on utilising family / social networks to encourage participation of MoP?
  - Are you aware of any existing groups for people who fall into our target group?
    - What do you think about “piggybacking” onto these existing community groups or existing care plans with the nurse?
    - How do you think people would react to this?

### Smoking cessation

- ‘We know that people really don’t like it when the doctor tells them to stop smoking and some people felt like they were treated differently by the doctors because they smoked. Sometimes this put people off going to the doctor with lung symptoms. On the other hand some people feel that it is only fair to be told to stop smoking. When we design something about lung cancer, we don’t know if we should include something to help people to stop smoking or not.’
- What do you think about including stop smoking information in the intervention?
  - How do you think smokers might react to including stop-smoking information?
  - Can you think of ways we might be able to include stop-smoking information without putting smokers off?
  - What do you think about using signposting to stop smoking services instead of providing information about smoking cessation during the session?
- What do you think about using the intervention to cover things that are not related to lung health i.e. mental health or other factors that could be related to lung health?
  - How should we approach this?

### Debrief

‘Thank you for taking part in this study. We hope to use the findings from this focus group to develop an intervention based on the findings from the interviews and your recommendations to encourage earlier lung symptom presentation in those who are high risk for lung cancer. Anything you said will be treated as confidential. The voice-recording will be stored securely. Any quotes used in published research will not have your name or anything that could identify you. Do you have any questions? [answer any questions] Here are my contact details if you have any further questions.’

## Supplementary File 4: Members of the public focus group topic guide

**Focus group aim:** To explore the needs and preferences from members of the public and local stakeholders for an intervention to support earlier lung cancer detection and diagnosis. The intervention will be targeted at high risk, harder to reach groups (over 40's, who are current/former smokers, living in areas of deprivation with serious lung comorbidity i.e. COPD).

### Introduction

- Explain the aims of the focus group. Emphasise that the focus group is not a test; we are interested in participants' preferences for an intervention for "lung health" to prompt earlier lung symptom presentation, and how we could access people to take part in an intervention. All comments are welcomed: positive and negative.
  - *'We know that some people sometimes might take a bit longer to go to the doctor with important lung symptoms. I am thinking about developing something that will highlight important lung symptoms, and encourage people to go to speak to someone who is medically trained about their symptoms. I would like to know what you think about best ways to do this. I would also like to know how you think we can find people for this. Your ideas and suggestions are really valuable to us, so all comments are welcomed (both positive and negative).'*
- Explain the voluntary nature of the study and that the focus group will be recorded with permission. If not already done, set up and switch on the recording equipment while participants sign the consent form.
- Before starting the focus group, remind participants about confidentiality and ask participants not to talk over each other. Go around the circle and ask participants to introduce themselves for the transcription.

**Rationale:** to explore whether the findings resonate with patients and members of the public in their local community

### Discussion of Phase 1 interview findings

Provide a short overview of key findings from Phase 1 interviews regarding barriers and enablers to lung cancer awareness and early symptom presentation in the target group. Ask the group to share their thoughts on the interview findings, and whether they resonate with them.

*'We did some interviews across the UK with people who smoke or used to smoke and have a lung condition like COPD. We found that people look out for symptoms of a chest infection most days. They were really good at knowing when they had a chest infection and going to the doctor to get antibiotics. We also found that people try not to think about health problems that might affect them in the future, so may not go to the doctor with some symptoms that could be serious.*

People really didn't like it when the doctor told them to stop smoking and some people felt like they were treated differently by the doctors because they smoked. Sometimes this put people off going to the doctor with lung symptoms.

We also found that people often had a favourite doctor at their GP practice and would wait up to three weeks for an appointment even if they thought a symptom was important. People don't like



going to doctors that they don't know because they felt that they did listen as much as their favourite doctor. But sometimes it was necessary to go to a doctor they don't know to get an appointment the same day.

We want to develop something that can help people get important lung symptoms seen to quicker by a medical professional, but we are not really sure how to do this or who should do this. We would like to know what you think.'

- What do you think of these findings?
- In what ways do you feel the same as what we found?
- In what ways do you feel different to what we found?

**Rationale:** to seek views on how to access the target group for an intervention and explore preferences for an intervention to support earlier presentation, including mode of delivery, target group, content and stop smoking information

## **Part 2. Needs and preferences for an intervention**

### ***Preferences on intervention format***

- In what ways could we support people to manage their lung health?
  - Probe: a group one-off educational session to promote "lung health" in the local community; a leaflet/DVD; a lung health check; event in the community; posters in the local community
- Who do you think would be best to lead an intervention about lung health?
  - Probe: lung cancer survivor, lay advisor, community partner, healthcare professional
- If a health care professional was to lead the intervention, who would be best to lead a lung health intervention?
- Who is your favourite healthcare professional?
- When would be best to support people to manage their lung health?
  - What about when someone is diagnosed with a lung condition?
  - What about in one of your regular check-up appointments with the nurse i.e. six-monthly COPD clinic review?

### ***Preferences on intervention content***

- **What would you like to know? OR what skills would you like to learn?**
  - What would be most useful or important for you?
  - Can you think of anything that we should avoid or anything that is not as important?
- What do you think about including information to help people to stop smoking?
  - How would you react to stop-smoking information?
  - Can you think of ways we might be able to include stop-smoking information without putting smokers off?
  - What do you think about telling people where they can get help to stop smoking if they want to, instead of giving people information about stop smoking?

### **Accessing intervention participants**

- Where could we approach people who smoke/used to smoke and have lung symptoms?
  - Probe: through community pharmacies, primary care, community nurses, existing groups for people with lung conditions/ utilising family and social networks / snowballing approaches?
- Are you aware of any community groups for these types of people?
  - How do you think people from these groups would react to being approached for a lung health intervention?

### **Debrief**

'Thank you for taking part in this study. We hope to use the findings from this focus group to develop something to encourage people to go to the doctor with important lung symptoms. Anything you said will be treated as confidential. The voice-recording will be stored securely. Any quotes used in published research will not have your name or anything that could identify you. Do you have any questions? [*answer any questions*] Here are my contact details if you have any further questions.'
